# Supplementary material for: 3D QSAR-based design and liquid phase combinatorial synthesis of 1,2-disubstituted benzimidazole-5-carboxylic acid and 3-substituted-5H-benzimidazo[1,2-d][1,4]benzodiazepin-6(7H)-one derivatives as anti-mycobacterial agents
Source: Royal Society of Chemistry journal article supplement (doi:10.1039/c9md00006b), 2019-01-01
Supplement: c9md00006b1.pdf [file c9md00006b1.pdf]

## Electronic Supplementary Information (ESI)

### **3D QSAR-based design and liquid phase combinatorial synthesis of 1,2-disubstituted benzimidazole-5-carboxylic acid and 3-substituted-5H-benzimidazo[1,2-d][1,4]benzodiazepin-6 (7H)-one derivatives as anti-mycobacterial agents**

**Nikum Sitwala<sup>a</sup>, Vivek K. Vyas<sup>a</sup>, Piyush Gedia<sup>a</sup>, Kinjal Patel<sup>a</sup>, Rania Bouzeyen<sup>b</sup>, Saqib Kidwai<sup>c</sup>, Ramandeep Singh<sup>c</sup>, Manjunath D. Ghate<sup>\*a</sup>**

<sup>a</sup>Department of Pharmaceutical Chemistry, Institute of Pharmacy, Nirma University, Ahmedabad 382481, Gujarat, India

<sup>b</sup>Institut Pasteur de Tunis, LTCII, LR11 IPT02, Tunis, 1002, Tunisia. Université Tunis El Manar, Tunis, 1068, Tunisia.

<sup>c</sup>Tuberculosis Research Laboratory, Vaccine and Infectious Disease Research Centre, Translational Health Science and Technology Institute, Faridabad-Gurugram Expressway, Haryana, India.

| Content                                                                                                                                                                                                                                                                                                                                                                                                                                                                                                                                                                                                                | Page no. |
|------------------------------------------------------------------------------------------------------------------------------------------------------------------------------------------------------------------------------------------------------------------------------------------------------------------------------------------------------------------------------------------------------------------------------------------------------------------------------------------------------------------------------------------------------------------------------------------------------------------------|----------|
| <b>Table-S1.</b> Structure of the compound with MIC and pMIC value used for 3D QSAR analysis                                                                                                                                                                                                                                                                                                                                                                                                                                                                                                                           | S4-S8    |
| <b>Fig.-S1.</b> Pharmacophore based-alignment of training and test set compounds                                                                                                                                                                                                                                                                                                                                                                                                                                                                                                                                       | S8       |
| <b>Table-S2.</b> Statistical data of PLS analysis                                                                                                                                                                                                                                                                                                                                                                                                                                                                                                                                                                      | S8       |
| <b>Fig.-S2.</b> Plots of experimental pMIC and predicted pMIC using CoMFA and CoMSIA models                                                                                                                                                                                                                                                                                                                                                                                                                                                                                                                            | S9       |
| <b>Fig.-S3.</b> CoMFA contour maps with compound <b>5</b> inside the maps. (A) Steric fields- favourable (green 80% contribution) and unfavourable (yellow 20% contribution). (B) Electrostatic fields- favourable (blue 80% contribution) and unfavourable (red 20% contribution).                                                                                                                                                                                                                                                                                                                                    | S9       |
| <b>Fig.-S4.</b> CoMSIA contour maps with Compound <b>5</b> was overlaid in each map. Favourable and unfavourable field regions were 80% and 20%, respectively (A) Hydrophobic fields- favourable ( <i>yellow</i> ) and unfavourable ( <i>grey</i> ) (B) H-bond donor fields- favourable ( <i>cyan</i> ) and unfavourable ( <i>purple</i> ) fields. (C) H-bond acceptor fields- favourable ( <i>magenta</i> ) and unfavourable ( <i>red</i> ). (D) Steric fields- favourable ( <i>green</i> ) and unfavourable ( <i>yellow</i> ). (E) Electrostatic fields- favourable ( <i>blue</i> ) and unfavourable ( <i>red</i> ). | S10      |
| <b>Table-S3.</b> Predicted pMIC based on generated CoMFA and CoMSIA models along with designed molecules.                                                                                                                                                                                                                                                                                                                                                                                                                                                                                                              | S11-S15  |
| <b>Fig.-S5.</b> Determination of structure of compound <b>7a</b> by X-ray crystallographic studies.                                                                                                                                                                                                                                                                                                                                                                                                                                                                                                                    | S16      |
| <b>Experimental details of crystal data of 7a</b>                                                                                                                                                                                                                                                                                                                                                                                                                                                                                                                                                                      | S16-S17  |
| Compounds characterization data of synthesised compounds <b>7a-o</b> (series-1)                                                                                                                                                                                                                                                                                                                                                                                                                                                                                                                                        | S17-S20  |
| Compounds Characterization data of synthesised compounds <b>16, 17a-i</b> (series-2)                                                                                                                                                                                                                                                                                                                                                                                                                                                                                                                                   | S21-S23  |
| FTIR, MASS, <sup>1</sup> HNMR, <sup>13</sup> C NMR and HPLC spectra and single crystal images of <b>7a</b>                                                                                                                                                                                                                                                                                                                                                                                                                                                                                                             | S24-S26  |
| FTIR, MASS, <sup>1</sup> HNMR, D <sub>2</sub> O exchange <sup>1</sup> HNMR, <sup>13</sup> C NMR and HPLC spectra of <b>7b</b>                                                                                                                                                                                                                                                                                                                                                                                                                                                                                          | S27-S29  |
| FTIR, MASS, <sup>1</sup> HNMR, D <sub>2</sub> O exchange <sup>1</sup> HNMR, <sup>13</sup> C NMR and HPLC spectra of <b>7c</b>                                                                                                                                                                                                                                                                                                                                                                                                                                                                                          | S30-S32  |
| FTIR, MASS, <sup>1</sup> HNMR, D <sub>2</sub> O exchange <sup>1</sup> HNMR, <sup>13</sup> C NMR and HPLC spectra of <b>7d</b>                                                                                                                                                                                                                                                                                                                                                                                                                                                                                          | S33-S35  |
| FTIR, MASS, <sup>1</sup> HNMR, D <sub>2</sub> O exchange <sup>1</sup> HNMR, <sup>13</sup> C NMR and HPLC spectra of <b>7e</b>                                                                                                                                                                                                                                                                                                                                                                                                                                                                                          | S36-S38  |
| FTIR, MASS, <sup>1</sup> HNMR, D <sub>2</sub> O exchange <sup>1</sup> HNMR, <sup>13</sup> C NMR and HPLC spectra of <b>7f</b>                                                                                                                                                                                                                                                                                                                                                                                                                                                                                          | S39-S41  |
| FTIR, MASS, <sup>1</sup> HNMR, D <sub>2</sub> O exchange <sup>1</sup> HNMR, <sup>13</sup> C NMR and HPLC spectra of <b>7g</b>                                                                                                                                                                                                                                                                                                                                                                                                                                                                                          | S42-S44  |
| FTIR, MASS, <sup>1</sup> HNMR, D <sub>2</sub> O exchange <sup>1</sup> HNMR, <sup>13</sup> C NMR and HPLC spectra of <b>7h</b>                                                                                                                                                                                                                                                                                                                                                                                                                                                                                          | S45-S47  |
| FTIR, MASS, <sup>1</sup> HNMR, D <sub>2</sub> O exchange <sup>1</sup> HNMR, <sup>13</sup> C NMR and HPLC spectra of <b>7i</b>                                                                                                                                                                                                                                                                                                                                                                                                                                                                                          | S48-S50  |
| FTIR, MASS, <sup>1</sup> HNMR, <sup>13</sup> C NMR and HPLC spectra of <b>7j</b>                                                                                                                                                                                                                                                                                                                                                                                                                                                                                                                                       | S51-S53  |
| FTIR, MASS, <sup>1</sup> HNMR, D <sub>2</sub> O exchange <sup>1</sup> HNMR, <sup>13</sup> C NMR and HPLC spectra of <b>7k</b>                                                                                                                                                                                                                                                                                                                                                                                                                                                                                          | S53-S56  |
| FTIR, MASS, <sup>1</sup> HNMR, D <sub>2</sub> O exchange <sup>1</sup> HNMR, <sup>13</sup> C NMR and HPLC spectra of <b>7l</b>                                                                                                                                                                                                                                                                                                                                                                                                                                                                                          | S56-S59  |
| FTIR, MASS, <sup>1</sup> HNMR, D <sub>2</sub> O exchange <sup>1</sup> HNMR, <sup>13</sup> C NMR and HPLC spectra of <b>7m</b>                                                                                                                                                                                                                                                                                                                                                                                                                                                                                          | S59-S62  |
| FTIR, MASS, <sup>1</sup> HNMR, D <sub>2</sub> O exchange <sup>1</sup> HNMR, <sup>13</sup> C NMR and HPLC spectra of <b>7n</b>                                                                                                                                                                                                                                                                                                                                                                                                                                                                                          | S62-S65  |

|                                                                                                                                |                |
|--------------------------------------------------------------------------------------------------------------------------------|----------------|
| FTIR, MASS, <sup>1</sup> HNMR, D <sub>2</sub> O exchange <sup>1</sup> HNMR, <sup>13</sup> C NMR and HPLC spectra of <b>7o</b>  | <b>S65-S68</b> |
| FTIR, MASS, <sup>1</sup> HNMR, D <sub>2</sub> O exchange <sup>1</sup> HNMR, <sup>13</sup> C NMR and HPLC spectra of <b>16</b>  | <b>S69-S71</b> |
| FTIR, MASS, <sup>1</sup> HNMR, <sup>13</sup> C NMR and HPLC spectra of <b>17a</b>                                              | <b>S72-S74</b> |
| FTIR, MASS, <sup>1</sup> HNMR, D <sub>2</sub> O exchange <sup>1</sup> HNMR, <sup>13</sup> C NMR and HPLC spectra of <b>17b</b> | <b>S74-S77</b> |
| FTIR, MASS, <sup>1</sup> HNMR, D <sub>2</sub> O exchange <sup>1</sup> HNMR, <sup>13</sup> C NMR and HPLC spectra of <b>17c</b> | <b>S77-S80</b> |
| FTIR, MASS, <sup>1</sup> HNMR, D <sub>2</sub> O exchange <sup>1</sup> HNMR, <sup>13</sup> C NMR and HPLC spectra of <b>17d</b> | <b>S80-S83</b> |
| FTIR, MASS, <sup>1</sup> HNMR, D <sub>2</sub> O exchange <sup>1</sup> HNMR, <sup>13</sup> C NMR and HPLC spectra of <b>17e</b> | <b>S83-S86</b> |
| FTIR, MASS, <sup>1</sup> HNMR, D <sub>2</sub> O exchange <sup>1</sup> HNMR, <sup>13</sup> C NMR and HPLC spectra of <b>17f</b> | <b>S86-S89</b> |
| FTIR, MASS, <sup>1</sup> HNMR, D <sub>2</sub> O exchange <sup>1</sup> HNMR, <sup>13</sup> C NMR and HPLC spectra of <b>17g</b> | <b>S89-S92</b> |
| FTIR, MASS, <sup>1</sup> HNMR, D <sub>2</sub> O exchange <sup>1</sup> HNMR, <sup>13</sup> C NMR and HPLC spectra of <b>17h</b> | <b>S92-S95</b> |
| FTIR, MASS, <sup>1</sup> HNMR, D <sub>2</sub> O exchange <sup>1</sup> HNMR and HPLC spectra of <b>17i</b>                      | <b>S95-S97</b> |

---

**Table-S1.** Structure of the compounds with MIC and pMIC value used for 3D QSAR analysis

| Sr No. | R <sup>1</sup> | R <sup>2</sup> | MIC( $\mu$ M) | pMIC   |
|--------|----------------|----------------|---------------|--------|
| Tr1    |                |                | 0.63          | 6.2000 |
| Tr2    |                |                | 6.25          | 5.2040 |
| Tr3    |                |                | 100           | 4.0000 |
| Tr4    |                |                | 50            | 4.3010 |
| Tr5    |                |                | 0.06          | 7.2218 |
| Tr6    |                |                | 0.16          | 6.7958 |
| Tr7    |                |                | 3.13          | 5.5040 |
| Tr8    |                |                | 1.56          | 5.8060 |
| Tr9    |                |                | 1.56          | 5.8060 |
| Tr10   |                |                | 0.31          | 6.5086 |
| Ts11*  |                |                | 12.5          | 4.9030 |
| Ts12*  |                |                | 1.56          | 5.8060 |
| Tr13   |                |                | 0.31          | 6.5080 |

|              |                                                                                     |                                                                                     |      |        |
|--------------|-------------------------------------------------------------------------------------|-------------------------------------------------------------------------------------|------|--------|
| <b>Ts14*</b> |    |    | 0.63 | 6.2000 |
| <b>Tr15</b>  |    |    | 25   | 4.6020 |
| <b>Tr16</b>  |    |    | 25   | 4.6020 |
| <b>Tr17</b>  |    |    | 100  | 4.0000 |
| <b>Ts18*</b> |    |    | 6.25 | 5.2041 |
| <b>Tr19*</b> |    |    | 12.5 | 4.9030 |
| <b>Tr20</b>  |    |    | 1.56 | 5.8060 |
| <b>Tr21</b>  |    |    | 12.5 | 4.9030 |
| <b>Tr22</b>  |   |   | 10.0 | 5.0000 |
| <b>Tr23</b>  |  |  | 100  | 4.0000 |
| <b>Tr24</b>  |  |  | 25   | 4.6020 |
| <b>Tr25</b>  |  |  | 12.5 | 4.9030 |
| <b>Tr26</b>  |  |  | 25   | 4.6020 |
| <b>Tr27</b>  |  |  | 6.25 | 5.2041 |
| <b>Tr28</b>  |  |  | 6.25 | 5.2041 |
| <b>Tr29</b>  |  |  | 3.13 | 5.5040 |
| <b>Ts30*</b> |  |  | 1.56 | 5.8068 |
| <b>Ts31*</b> |  |  | 12.5 | 4.9030 |

|              |                                                                                     |                                                                                     |      |        |
|--------------|-------------------------------------------------------------------------------------|-------------------------------------------------------------------------------------|------|--------|
| <b>Tr32</b>  | 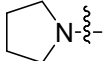   |    | 6.25 | 5.2041 |
| <b>Ts33*</b> |    |    | 12.5 | 4.9030 |
| <b>Ts34*</b> |    |    | 1.56 | 5.8068 |
| <b>Tr35</b>  |    |    | 0.31 | 6.5086 |
| <b>Tr36</b>  |    |    | 0.31 | 6.5086 |
| <b>Tr37</b>  |    |    | 0.16 | 6.7950 |
| <b>Tr38</b>  |    |    | 0.31 | 6.5086 |
| <b>Tr39</b>  |   |   | 0.16 | 6.7950 |
| <b>Tr40</b>  |  |  | 0.63 | 6.2000 |
| <b>Tr41</b>  |  |  | 1.56 | 5.8068 |
| <b>Ts42*</b> |  |  | 5.0  | 5.3010 |
| <b>Ts43*</b> |  |  | 6.25 | 5.2041 |
| <b>Tr44</b>  |  |  | 0.31 | 6.5086 |
| <b>Ts45*</b> |  |  | 3.13 | 5.4800 |
| <b>Tr46</b>  |  |  | 0.63 | 6.2000 |
| <b>Tr47</b>  |  |  | 0.31 | 6.5086 |
| <b>Tr48</b>  |  |  | 1.25 | 5.9030 |

|              |                                                                                     |                                                                                     |      |        |
|--------------|-------------------------------------------------------------------------------------|-------------------------------------------------------------------------------------|------|--------|
| <b>Tr49*</b> |    |    | 6.25 | 5.2041 |
| <b>Tr50</b>  |    |    | 0.63 | 6.2000 |
| <b>Tr51</b>  |    |    | 3.13 | 5.4800 |
| <b>Tr52</b>  |    |    | 1.56 | 5.8068 |
| <b>Tr53</b>  |    |    | 12.5 | 4.9030 |
| <b>Ts54*</b> |    |    | 12.5 | 4.9030 |
| <b>Tr55</b>  |    |    | 6.25 | 5.2041 |
| <b>Tr56</b>  |   |   | 12.5 | 4.9030 |
| <b>Ts57*</b> |  |  | 1.25 | 5.9030 |
| <b>Ts58*</b> |  |  | 1.25 | 5.9030 |
| <b>Ts59*</b> |  |  | 1.25 | 5.9030 |
| <b>Tr60</b>  |  |  | 7.9  | 5.1023 |
| <b>Ts61*</b> |  |  | 4.3  | 5.3660 |
| <b>Ts62*</b> |  |  | 7.4  | 5.1300 |
| <b>Ts63*</b> |  |  | 4.2  | 5.3767 |
| <b>Ts64*</b> |  |  | 14.1 | 4.8500 |
| <b>Ts65*</b> |  |  | 15.1 | 4.8210 |

|              |                                                                                   |                                                                                   |     |        |
|--------------|-----------------------------------------------------------------------------------|-----------------------------------------------------------------------------------|-----|--------|
| <b>Ts66*</b> | 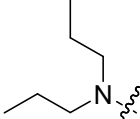 |  | 2.0 | 5.6989 |
| <b>Ts67*</b> |  |  | 3.8 | 5.4202 |
| <b>Tr68</b>  |  |  | 1.0 | 6      |
| <b>Tr69</b>  |  |  | 3.7 | 5.4317 |
| <b>Ts70*</b> |  |  | 2.3 | 5.6382 |

\* Test set molecules (Ts) Training set molecules (Tr)

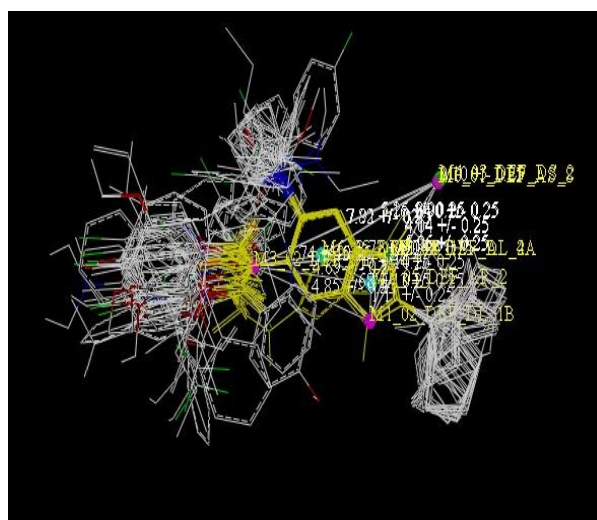

**Fig.-S1.** Pharmacophore based-alignment of training and test set compounds



**Table-S2.** Statistical data of PLS analysis

| Statistical Parameters    | CoMFA | CoMSIA |
|---------------------------|-------|--------|
| $q^2$                     | 0.727 | 0.640  |
| $r^2_{ncv}$               | 0.962 | 0.978  |
| $r^2_{cv}$                | 0.721 | 0.620  |
| $r^2_{bs}$                | 0.962 | 0.975  |
| N                         | 6     | 6      |
| $F_{test}$                | 161   | 132    |
| SEE                       | 0.176 | 0.152  |
| $R^2_{Pred}$              | 0.714 | 0.748  |
| <b>Field contribution</b> |       |        |
| Steric                    | 0.525 | 0.290  |
| Electrostatic             | 0.475 | 0.092  |
| Hydrophobic               | -     | 0.203  |
| H-bond donor              | -     | 0.265  |
| H-bond acceptor           | -     | 0.150  |

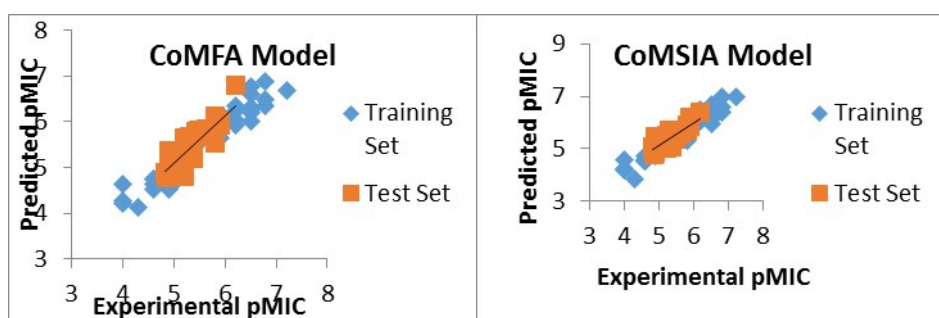

**Fig.-S2.** Plots of experimental pMIC and predicted pMIC using CoMFA and CoMSIA models

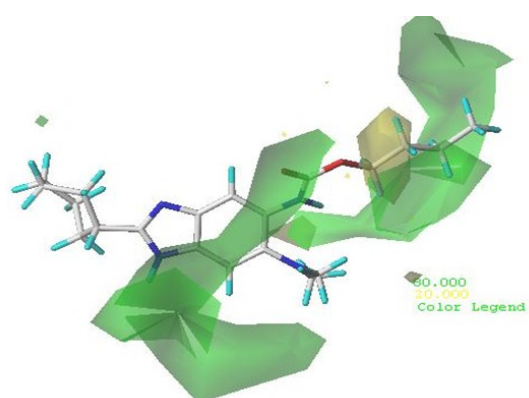

(A)

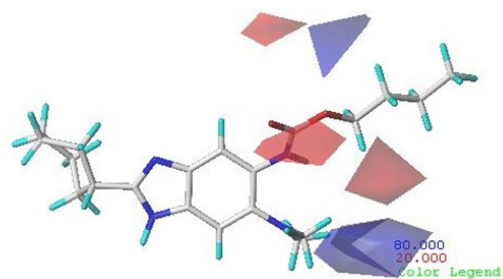

(B)

**Fig.-S3.** CoMFA contour maps with compound **Tr5** inside the maps. (A) Steric fields- favourable (green 80% contribution) and unfavourable (yellow 20% contribution). (B) Electrostatic fields- favourable (blue 80% contribution) and unfavourable (red 20% contribution).

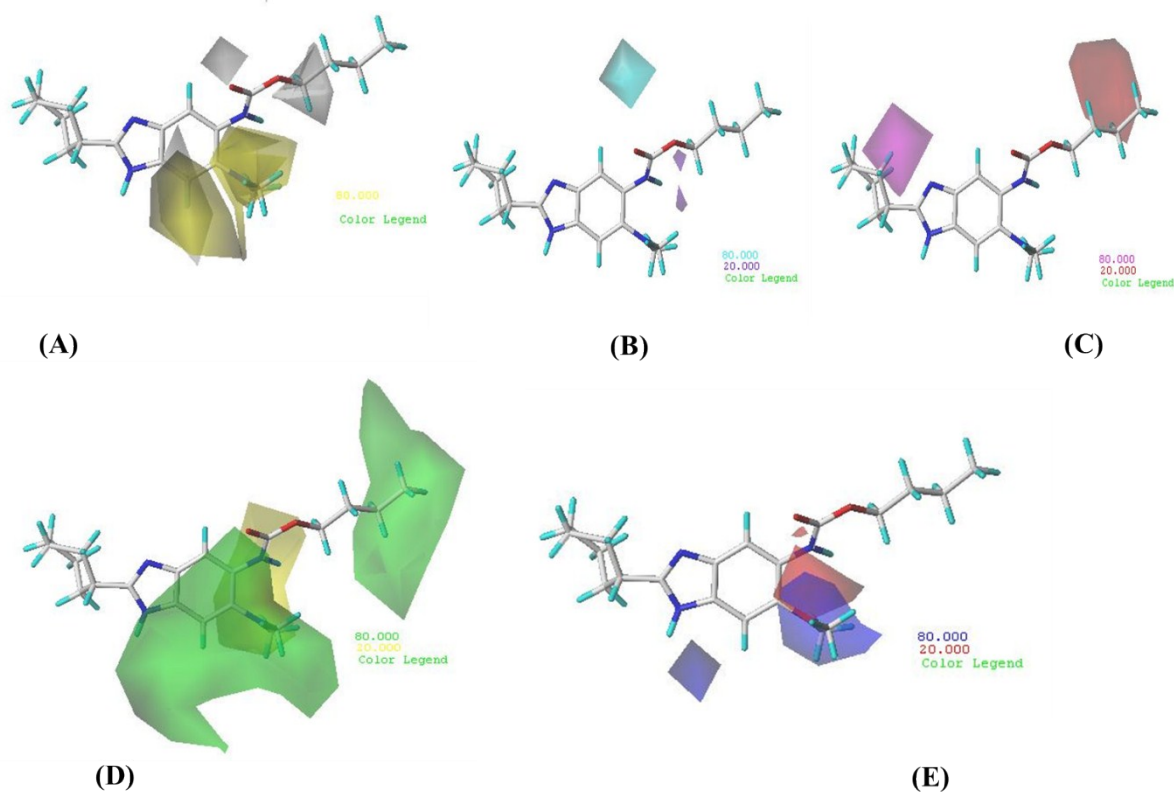

**Fig.-S4.** CoMSIA contour maps. Compound **Tr5** was overlaid in each map. Favourable and unfavourable field regions were 80% and 20%, respectively (A) Hydrophobic fields- favourable (*yellow*) and unfavourable (*grey*) (B) H-bond donor fields- favourable (*cyan*) and unfavourable (*purple*) fields. (C) H-bond acceptor fields- favourable (*magenta*) and unfavourable (*red*). (D) Steric fields- favourable (*green*) and unfavourable (*yellow*). (E) Electrostatic fields- favourable (*blue*) and unfavourable (*red*).

**Table-S3.** Predicted pMIC based on generated CoMFA and CoMSIA models along with designed molecules.

| 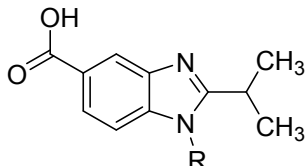<br><b>(D1 to D30)</b> |                                                                                     | <br><b>(D31 to D52)</b> |                       |                             |
|---------------------------------------------------------------------------------------------------------|-------------------------------------------------------------------------------------|------------------------------------------------------------------------------------------------------------|-----------------------|-----------------------------|
| Designed Compound number                                                                                | R                                                                                   | CoMFA Predicted pMIC                                                                                       | CoMSIA Predicted pMIC | Synthesised compound number |
| D1                                                                                                      |    | 7.352                                                                                                      | 7.523                 | <b>7a</b>                   |
| D2                                                                                                      |    | 7.753                                                                                                      | 7.521                 | <b>7b</b>                   |
| D3                                                                                                      |   | 7.451                                                                                                      | 7.329                 | <b>7c</b>                   |
| D4                                                                                                      |  | 7.983                                                                                                      | 7.017                 | <b>7d</b>                   |
| D5                                                                                                      |  | 7.326                                                                                                      | 7.419                 | <b>7e</b>                   |
| D6                                                                                                      |  | 7.451                                                                                                      | 6.946                 | <b>7f</b>                   |
| D7                                                                                                      |  | 7.345                                                                                                      | 7.451                 | <b>7g</b>                   |
| D8                                                                                                      |  | 6.981                                                                                                      | 6.819                 | <b>7h</b>                   |
| D9                                                                                                      |  | 6.318                                                                                                      | 6.417                 | <b>7i</b>                   |
| D10                                                                                                     |  | 6.989                                                                                                      | 6.861                 | <b>7j</b>                   |

|     |                                                                                     |       |       |           |
|-----|-------------------------------------------------------------------------------------|-------|-------|-----------|
| D11 | 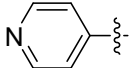   | 6.993 | 6.843 | <b>7k</b> |
| D12 |    | 6.872 | 6.792 | <b>7l</b> |
| D13 |    | 6.913 | 6.852 | <b>7m</b> |
| D14 |    | 6.912 | 6.854 | <b>7n</b> |
| D15 |    | 6.985 | 6.891 | <b>7o</b> |
| D16 |  | 5.014 | 4.923 | -----     |
| D17 |  | 3.865 | 3.726 | -----     |
| D18 |  | 4.167 | 3.972 | -----     |
| D19 |  | 4.235 | 4.186 | -----     |
| D20 |  | 3.768 | 3.762 | -----     |
| D21 |  | 4.461 | 4.185 | -----     |

|     |                                                                                     |       |       |       |
|-----|-------------------------------------------------------------------------------------|-------|-------|-------|
| D22 | 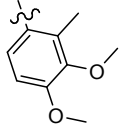   | 3.386 | 3.293 | ----- |
| D23 |    | 3.591 | 3.481 | ----- |
| D24 |    | 3.612 | 3.619 | ----- |
| D25 |    | 4.193 | 4.156 | ----- |
| D26 |    | 3.981 | 3.825 | ----- |
| D27 |   | 3.382 | 3.646 | ----- |
| D28 |  | 3.656 | 3.291 | ----- |
| D29 |  | 3.492 | 3.167 | ----- |
| D30 |  | 3.678 | 3.651 | ----- |

|     |                                                                                     |       |       |            |
|-----|-------------------------------------------------------------------------------------|-------|-------|------------|
| D31 |    | 7.966 | 7.815 | <b>16</b>  |
| D32 |    | 7.405 | 7.304 | <b>17a</b> |
| D33 |    | 7.502 | 7.618 | <b>17b</b> |
| D34 |    | 7.210 | 7.834 | <b>17c</b> |
| D35 |   | 6.321 | 6.983 | <b>17d</b> |
| D36 |  | 5.947 | 6.017 | <b>17e</b> |
| D37 |  | 7.046 | 6.993 | <b>17f</b> |
| D38 |  | 7.263 | 7.184 | <b>17g</b> |
| D39 |  | 7.776 | 7.861 | <b>17h</b> |
| D40 |  | 7.439 | 7.327 | <b>17i</b> |

|     |                                                                                     |       |       |       |
|-----|-------------------------------------------------------------------------------------|-------|-------|-------|
| D41 | 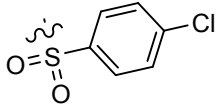   | 4.892 | 4.521 | ----- |
| D42 |    | 4.321 | 4.322 | ----- |
| D43 |    | 4.181 | 4.224 | ----- |
| D44 |    | 3.932 | 3.712 | ----- |
| D45 |    | 3.165 | 3.217 | ----- |
| D46 |    | 3.182 | 3.271 | ----- |
| D47 |    | 3.561 | 3.213 | ----- |
| D48 |    | 3.256 | 3.167 | ----- |
| D49 |   | 3.651 | 3.514 | ----- |
| D50 |  | 3.134 | 3.092 | ----- |
| D51 |  | 3.571 | 3.431 | ----- |
| D52 |  | 3.276 | 3.241 | ----- |



**Fig.-S5.** Determination of structure of compound **7a** by X-ray crystallographic studies.

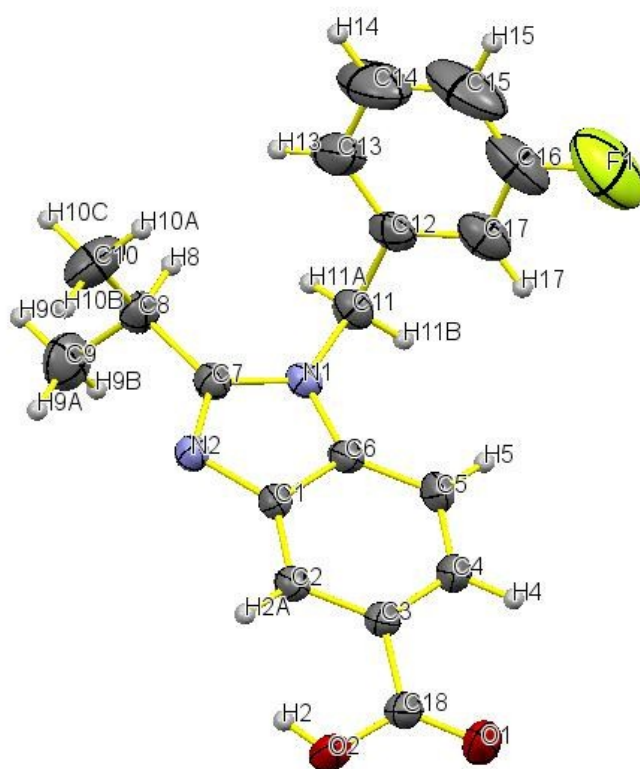

### Experimental details of crystal data of **7a**

|                      |                                                                                        |
|----------------------|----------------------------------------------------------------------------------------|
| Empirical Formula    | C <sub>18</sub> H <sub>17</sub> FN <sub>2</sub> O <sub>2</sub>                         |
| Formula Weight       | 312.34                                                                                 |
| Crystal Color, Habit | orange, block                                                                          |
| Crystal Dimensions   | 0.700 X 0.590 X 0.330 mm                                                               |
| Crystal System       | orthorhombic                                                                           |
| Lattice Type         | Primitive                                                                              |
| Lattice Parameters   | a = 10.0539(9) Å<br>b = 10.653(1) Å<br>c = 14.944(2) Å<br>V = 1600.5(3) Å <sup>3</sup> |

|                   |                                                     |
|-------------------|-----------------------------------------------------|
| Space Group       | P2 <sub>1</sub> 2 <sub>1</sub> 2 <sub>1</sub> (#19) |
| Z value           | 4                                                   |
| D <sub>calc</sub> | 1.296 g/cm <sup>3</sup>                             |
| F <sub>000</sub>  | 656.00                                              |
| m(MoKa)           | 0.932 cm <sup>-1</sup>                              |

### Compounds characterization data of synthesised compounds 7a-o (series-1)

#### *1-(3-Fluorobenzyl)-2-isopropyl-1H-benzo[d]imidazole-5-carboxylic acid (7a)*

Compound **7a** was synthesized as off-white amorphous solid in yield of 18%, mp – 205-207 °C; ESI-MS m/z: 313 (M+1); <sup>1</sup>H NMR (400 MHz, DMSO-d<sub>6</sub>) δ 1.26 (d, 6H, *J*=6.8Hz), 3.28 (m, 1H), 5.63 (s, 2H), 6.83 (d, 1H, *J*=8.0Hz), 6.95 (d, 1H, *J*=10.0Hz), 7.11 (td, 1H, *J*<sub>12</sub>=1.6Hz, *J*<sub>13</sub>=8.4Hz), 7.35 (q, 1H, *J*=8.0Hz), 7.55 (d, 1H, *J*=8.4Hz), 7.83 (d, 1H, *J*=8.4Hz), 8.23 (s, 1H), 12.81 (bs, 1H); <sup>13</sup>C-NMR (100 MHz, DMSO-d<sub>6</sub>) δ 22.0, 26.2, 45.9, 110.5, 113.6, 114.7, 120.8, 122.6, 123.8, 124.9, 131.3, 138.8, 140.3, 142.3, 161.5, 162.3, 168.4. HPLC: 98.86%. Single crystal XRD confirms structure.

#### *1-(4-Bromophenyl)-2-isopropyl-1H-benzo[d]imidazole-5-carboxylic acid (7b)*

Compound **7b** was synthesized as white amorphous solid in yield of 22%, mp – 210-211 °C; ESI-MS m/z: 359 (M+1) and 361 (M+3); <sup>1</sup>H NMR (400 MHz, DMSO-d<sub>6</sub>) δ 1.56 (d, 6H, *J*=6.8Hz), 4.64 (m, 1H), 7.62 (d, 2H, *J*=8.0Hz), 7.68 (d, 1H, *J*=8.4Hz), 7.76 (d, 2H, *J*=8.0Hz), 8.01 (d, 1H, *J*=8.4Hz), 8.33 (s, 1H); <sup>13</sup>C-NMR (100 MHz, DMSO-d<sub>6</sub>) δ 20.9, 48.5, 110.9, 120.8, 123.2, 124.3, 130.0, 131.4, 131.6, 133.5, 134.3, 142.8, 152.2, 170.8. HPLC: 100%.

#### *2-Isopropyl-1-(3-nitrophenyl)-1H-benzo[d]imidazole-5-carboxylic acid (7c)*

Compound **7c** was synthesized as yellow amorphous solid in yield of 14%, mp – 195-198 °C; ESI-MS m/z: 326 (M+1); <sup>1</sup>H NMR (400 MHz, DMSO-d<sub>6</sub>) δ 1.64 (d, 6H, *J*=7.2Hz), 4.73 (m, 1H), 7.89 (m, 2H), 7.97 (d, 1H, *J*=8.8Hz), 8.16 (d, 1H, *J*=8.0Hz), 8.31 (s, 1H), 8.43 (dd, 1H, *J*<sub>12</sub>=1.6Hz, *J*<sub>13</sub>=8.0Hz), 8.51 (s, 1H), 12.89 (bs, 1H); <sup>13</sup>C-NMR (100 MHz, DMSO-d<sub>6</sub>) δ 20.8, 49.1, 112.8, 121.8, 123.7, 124.3, 124.6, 124.7, 130.4, 131.6, 135.7, 136.5, 142.8, 147.8, 152.6, 167.6. HPLC: 97.59%.

*1-(4-Hydroxyphenyl)-2-isopropyl-1H-benzo[d]imidazole-5-carboxylic acid (7d)*

Compound **7d** was synthesized as off-white amorphous solid in yield of 20%, mp – 212-214 °C; ESI-MS m/z: 297 (M+1); <sup>1</sup>H NMR (400 MHz, DMSO-d<sub>6</sub>) δ 1.59 (d, 6H, *J*=6.8Hz), 4.73 (m, 1H), 6.98 (d, 2H, *J*=8.4Hz), 7.52 (d, 2H, *J*=8.4Hz), 7.89 (s, 2H), 8.26 (s, 1H), 10.14 (bs, 1H), 12.79 (bs, 1H); <sup>13</sup>C-NMR (100 MHz, DMSO-d<sub>6</sub>) δ 20.7, 48.6, 112.3, 115.4, 120.6, 120.8, 123.0, 124.1, 130.9, 136.4, 142.8, 155.2, 158.9, 167.8. HPLC: 100%.

*1-(2-Hydroxy-3-methoxyphenyl)-2-isopropyl-1H-benzo[d]imidazole-5-carboxylic acid (7e)*

Compound **7e** was synthesized as off-white amorphous solid in yield of 27%, mp – 210-211 °C; ESI-MS m/z: 327 (M+1); <sup>1</sup>H NMR (400 MHz, DMSO-d<sub>6</sub>) δ 1.53 (d, 6H, *J*=6.8Hz), 3.88 (s, 3H), 4.39 (m, 1H), 6.92 (m, 2H), 7.15 (d, 1H, *J*=7.2Hz), 7.88 (s, 2H), 8.26 (s, 1H), 9.88 (bs, 1H), 12.36 (bs, 1H); <sup>13</sup>C-NMR (100 MHz, DMSO-d<sub>6</sub>) δ 20.5, 48.9, 55.8, 112.0, 113.2, 117.8, 119.2, 120.9, 122.7, 123.0, 123.9, 136.0, 142.9, 145.1, 147.6, 153.0, 167.8. HPLC: 98.45%.

*1-(3,5-Dimethoxyphenyl-4-hydroxy)-2-isopropyl-1H-benzo[d]imidazole-5-carboxylic acid (7f)*

Compound **7f** was synthesized as off-white amorphous solid in yield of 24%, mp – 218-220 °C; ESI-MS m/z: 357 (M+1); <sup>1</sup>H NMR (400 MHz, DMSO-d<sub>6</sub>) δ 1.62 (d, 6H, *J*=6.4Hz), 3.87 (s, 6H), 4.87 (m, 1H), 6.94 (s, 2H), 7.89 (s, 2H), 8.29 (s, 1H), 9.01 (bs, 1H), 12.81 (bs, 1H); <sup>13</sup>C-NMR (100 MHz, DMSO-d<sub>6</sub>) δ 20.7, 48.7, 56.0, 106.9, 112.3, 119.7, 120.8, 123.0, 124.2, 136.5, 137.2, 142.8, 147.8, 155.4, 167.8. HPLC: 98.77%.

*1-(3,4-Dimethoxyphenyl)-2-isopropyl-1H-benzo[d]imidazole-5-carboxylic acid (7g)*

Compound **7g** was synthesized as off-white amorphous solid in yield of 27%, mp – 207-209 °C; ESI-MS m/z: 341 (M+1); <sup>1</sup>H NMR (400 MHz, DMSO-d<sub>6</sub>) δ 1.61 (d, 6H, *J*=6.8Hz), 3.86 (s, 3H), 3.87 (s, 3H), 4.79 (m, 1H), 7.14 (d, 1H, *J*=8.0Hz), 7.21 (m, 2H), 7.90 (s, 2H), 8.28 (s, 1H), 12.84 (bs, 1H); <sup>13</sup>C-NMR (100 MHz, DMSO-d<sub>6</sub>) δ 20.7, 48.7, 55.5, 55.5, 111.5, 112.3, 112.7, 120.9, 121.9, 122.3, 123.1, 124.2, 136.5, 142.8, 148.6, 150.0, 154.9, 167.8. HPLC: 100%.

*1-(4-(Dimethylamino)phenyl)-2-isopropyl-1H-benzo[d]imidazole-5-carboxylic acid (7h)*

Compound **7h** was synthesized as off-white amorphous solid in yield of 22%, mp – 191-192 °C; ESI-MS m/z: 323 (M+1); <sup>1</sup>H NMR (400 MHz, DMSO-d<sub>6</sub>) δ 1.58 (d, 6H, *J*=6.8Hz), 3.00 (s, 6H), 4.78 (m, 1H), 6.84 (d, 2H, *J*=8.4Hz), 7.49 (d, 2H, *J*=8.8Hz), 7.86 (s, 2H), 8.25 (s, 1H),

12.76 (bs, 1H); <sup>13</sup>C-NMR (100 MHz, DMSO-d<sub>6</sub>) δ 20.7, 29.3, 48.6, 111.1, 111.6, 112.1, 116.7, 120.5, 120.6, 122.7, 123.3, 123.9, 124.0, 130.2, 136.6, 143.0, 151.0, 155.7, 167.9. HPLC: 92.88%.

*1-(4-Cyanophenyl)-2-isopropyl-1H-benzo[d]imidazole-5-carboxylic acid (7i)*

Compound **7i** was synthesized as off-white amorphous solid in yield of 25%, mp – 198-200 °C; ESI-MS m/z: 306 (M+1); <sup>1</sup>H NMR (400 MHz, DMSO-d<sub>6</sub>) δ 1.62 (d, 6H, *J*=6.8Hz), 4.70 (m, 1H), 7.85 (m, 4H), 8.07 (d, 2H, *J*=7.6Hz), 8.31 (s, 1H), 12.86 (bs, 1H); <sup>13</sup>C-NMR (100 MHz, DMSO-d<sub>6</sub>) δ 20.8, 49.1, 112.5, 118.3, 121.4, 123.6, 124.6, 129.4, 129.9, 130.4, 132.6, 134.6, 136.5, 142.8, 153.1, 167.6. HPLC: 93.25%.

*2-Isopropyl-1-(pyridin-3-yl)-1H-benzo[d]imidazole-5-carboxylic acid (7j)*

Compound **7j** was synthesized as off-white amorphous solid in yield of 21%, mp – 208-211 °C; ESI-MS m/z: 282 (M+1); <sup>1</sup>H NMR (400 MHz, DMSO-d<sub>6</sub>) δ 1.60 (d, 6H, *J*=6.8Hz), 4.65 (m, 1H), 7.61 (m, 1H), 7.85 (q, 2H, *J*=8.8Hz), 8.11 (m, 1H), 8.25 (s, 1H), 8.77 (dd, 1H, *J*<sub>12</sub>=1.6Hz, *J*<sub>13</sub>=8.8Hz), 8.88 (d, 1H, *J*=1.6Hz); <sup>13</sup>C-NMR (100 MHz, DMSO-d<sub>6</sub>) δ 20.7, 49.0, 112.0, 121.1, 123.6, 126.6, 128.0, 135.6, 137.0, 142.9, 148.0, 149.6, 150.6, 151.6, 169.0. HPLC: 95.80%.

*2-Isopropyl-1-(pyridin-4-yl)-1H-benzo[d]imidazole-5-carboxylic acid (7k)*

Compound **7k** was synthesized as off-white amorphous solid in yield of 17%, mp – 207-209 °C; ESI-MS m/z: 282 (M+1); <sup>1</sup>H NMR (400 MHz, DMSO-d<sub>6</sub>) δ 1.59 (d, 6H, *J*=6.8Hz), 4.72 (m, 1H), 7.13 (d, 2H, *J*=8.4Hz), 7.62 (d, 2H, *J*=8.4Hz), 7.90 (s, 2H), 8.28 (s, 1H), 12.86 (bs, 1H); <sup>13</sup>C-NMR (100 MHz, DMSO-d<sub>6</sub>) δ 20.7, 48.7, 112.3, 114.1, 120.9, 122.3, 123.1, 124.2, 130.8, 136.4, 142.9, 154.8, 160.4, 167.8. HPLC: 100%.

*1-(2-Chlorophenyl)-2-isopropyl-1H-benzo[d]imidazole-5-carboxylic acid (7l)*

Compound **7l** was synthesized as off-white amorphous solid in yield of 29%, mp – 212-213 °C; ESI-MS m/z: 315 (M+1) and 317 (M+3); <sup>1</sup>H NMR (400 MHz, DMSO-d<sub>6</sub>) δ 1.47 (d, 6H, *J*=6.8Hz), 4.25 (m, 1H), 7.55 (m, 1H), 7.64 (m, 2H), 7.71 (d, 1H, *J*=8.0Hz), 7.95 (s, 2H), 8.32 (s, 1H), 12.87 (bs, 1H); <sup>13</sup>C-NMR (100 MHz, DMSO-d<sub>6</sub>) δ 20.7, 49.0, 112.3, 121.3, 123.5, 124.4, 127.4, 129.5, 129.9, 132.0, 133.1, 135.7, 142.8, 151.8, 167.7. HPLC: 100%.

*1-((1-(4-Fluorobenzoyl)piperidin-4-yl)methyl)-2-isopropyl-1H-benzo[d]imidazole-5-carboxylic acid (7m)*

Compound **7m** was synthesized as off-white amorphous solid in yield of 19%, mp – 178-181 °C; ESI-MS m/z: 424 (M+1); <sup>1</sup>H NMR (400 MHz, DMSO-d<sub>6</sub>) δ 1.22 (m, 1H), 1.34 (d, 6H, *J*=6.4Hz), 1.35 (m, 1H), 1.50 (m, 2H), 2.12 (m, 1H), 2.67 (m, 1H), 2.99 (m, 1H), 3.31 (m, 1H), 3.57 (m, 1H), 4.19 (d, 2H, *J*=7.2Hz), 4.48 (m, 1H), 7.27 (m, 2H), 7.44 (m, 2H), 7.68 (d, 1H, *J*=8.4Hz), 7.84 (d, 1H, *J*=8.4Hz), 8.18 (s, 1H), 12.76 (bs, 1H); <sup>13</sup>C-NMR (100 MHz, DMSO-d<sub>6</sub>) δ 13.9, 21.8, 25.5, 28.8, 29.4, 36.6, 41.3, 46.9, 47.7, 110.3, 115.4, 120.1, 122.9, 123.9, 127.3, 127.3, 129.1, 132.0, 132.6, 138.4, 141.7, 161.1, 162.0, 163.6, 166.3, 167.9. HPLC: 99.14%.

*2-Isopropyl-1-((1-(4-methoxybenzoyl)piperidin-4-yl)methyl)-1H-benzo[d]imidazole-5-carboxylic acid (7n)*

Compound **7n** was synthesized as off-white amorphous solid in yield of 15%, mp – 183-184 °C; ESI-MS m/z: 436 (M+1); <sup>1</sup>H NMR (400 MHz, DMSO-d<sub>6</sub>) δ 1.33 (d, 6H, *J*=6.8Hz), 1.35 (m, 2H), 1.48 (m, 2H), 2.10 (m, 1H), 2.69 (m, 1H), 2.92 (m, 1H), 3.31 (m, 1H), 3.80 (s, 3H), 3.85 (m, 1H), 4.18 (d, 2H, *J*=6.8Hz), 4.45 (m, 1H), 6.98 (d, 2H, *J*=8.4Hz), 7.34 (d, 2H, *J*=8.4Hz), 7.68 (d, 1H, *J*=8.4Hz), 7.84 (d, 1H, *J*=8.0Hz), 8.18 (s, 1H), 12.75 (bs, 1H); <sup>13</sup>C-NMR (100 MHz, DMSO-d<sub>6</sub>) δ 21.8, 25.5, 29.2, 36.7, 47.8, 55.1, 64.8, 110.3, 113.5, 120.1, 122.9, 123.9, 128.1, 128.7, 131.3, 138.4, 141.7, 160.0, 162.0, 167.9, 168.8. HPLC: 96.49%.

*2-Isopropyl-1-((1-(4-methylbenzoyl)piperidin-4-yl)methyl)-1H-benzo[d]imidazole-5-carboxylic acid (7o)*

Compound **7o** was synthesized as off-white amorphous solid in yield of 18%, mp – 177-178 °C; ESI-MS m/z: 420 (M+1); <sup>1</sup>H NMR (400 MHz, DMSO-d<sub>6</sub>) δ 1.34 (d, 8H, *J*=6.0Hz), 1.49 (m, 2H), 2.11 (m, 1H), 2.33 (s, 3H), 2.64 (m, 1H), 2.96 (m, 1H), 3.28 (m, 2H), 4.19 (d, 2H, *J*=6.8Hz), 4.49 (m, 1H), 7.23 (q, 4H, *J*=8.0Hz), 7.68 (d, 1H, *J*=8.4Hz), 7.85 (d, 1H, *J*=8.0Hz), 8.19 (s, 1H); <sup>13</sup>C-NMR (100 MHz, DMSO-d<sub>6</sub>) δ 20.8, 21.0, 22.0, 25.5, 28.9, 29.5, 36.6, 41.2, 46.8, 47.7, 60.1, 69.7, 72.3, 110.3, 120.1, 122.9, 124.0, 126.7, 128.8, 133.3, 138.3, 138.9, 141.7, 162.0, 168.0, 168.9. HPLC: 98.70%.

## Compounds characterization data of synthesised compounds 16, 17a-i (series-2)

### *3-Amino-5H-benzimidazo[1,2-D][1,4]benzodiazepin-6(7H)-one (16)*

Compound **16** was synthesized as yellow amorphous solid in yield of 25%, mp – 163-165°C; ESI-MS m/z: 265 (M+1); <sup>1</sup>H-NMR (400 MHz, DMSO-d<sub>6</sub>) δ 4.82 (s, 2H), 5.89 (s, 2H), 6.38 (d, 1H, *J*=1.6Hz), 6.53 (dd, 1H, *J*<sub>12</sub>=2Hz, *J*<sub>13</sub>=8.8Hz), 7.20 (m, 2H), 7.62 (m, 1H), 7.71 (m, 2H), 10.39 (s, 1H); <sup>13</sup>C-NMR (100 MHz, DMSO-d<sub>6</sub>) δ 46.7, 104.7, 107.9, 109.5, 111.1, 118.4, 121.6, 122.0, 131.2, 134.4, 137.5, 143.0, 151.7, 151.8, 167.6. HPLC: 98.06%

### *N-(6-oxo-6,7-dihydro-5H-benzimidazo[1,2-d][1,4]benzodiazepin-3-yl)benzamide (17a)*

Compound **17a** was synthesized as off-white amorphous solid in yield of 38%, mp – 185-187 °C; ESI-MS m/z: 369 (M+1); <sup>1</sup>H NMR (400 MHz, DMSO-d<sub>6</sub>) δ 4.87 (s, 2H), 7.30 (d, 2H, *J*=7.2Hz), 7.37 (s, 4H), 7.58 (m, 2H), 8.02 (m, 3H), 8.27 (m, 1H), 10.36 (s, 1H), 10.70 (s, 1H); <sup>13</sup>C-NMR (100 MHz, DMSO-d<sub>6</sub>) δ 46.9, 101.5, 109.7, 116.5, 119.1, 120.7, 122.0, 124.6, 127.6, 128.3, 129.9, 131.2, 134.4, 135.1, 136.1, 139.9, 143.1, 150.9, 165.4, 167.9. HPLC: 99.69 %

### *4-Bromo-N-(6-oxo-6,7-dihydro-5H-benzimidazo[1,2-d][1,4]benzodiazepin-3-yl)benzamide (17b)*

Compound **17b** was synthesized as off-white amorphous solid in yield of 29%, mp – 189-193 °C; ESI-MS m/z: 447 (M+1); <sup>1</sup>H NMR (400 MHz, DMSO-d<sub>6</sub>) δ 4.87 (s, 2H), 7.30 (d, 2H, *J*=7.2Hz), 7.37 (m, 5H), 7.58 (m, 2H), 7.98 (s, 2H), 8.11 (s, 1H), 8.26 (m, 1H), 10.42 (s, 1H), 10.70 (s, 1H); <sup>13</sup>C-NMR (100 MHz, DMSO-d<sub>6</sub>) δ 46.9, 101.6, 109.8, 110.9, 116.9, 119.1, 120.7, 122.0, 124.6, 125.3, 129.3, 129.9, 131.2, 134.4, 136.1, 140.0, 143.1, 150.6, 151.0, 164.4, 167.8. HPLC: 100 %

### *4-Nitro-N-(6-oxo-6,7-dihydro-5H-benzimidazo[1,2-d][1,4]benzodiazepin-3-yl)benzamide (17c)*

Compound **17c** was synthesized as yellow amorphous solid in yield of 39%, mp – 181-184 °C; ESI-MS m/z: 414 (M+1); <sup>1</sup>H NMR (400 MHz, DMSO-d<sub>6</sub>) δ 4.88 (s, 2H), 7.30 (d, 1H, *J*=7.2Hz), 7.36 (d, 1H, *J*=7.6Hz), 7.57 (m, 2H), 7.70 (m, 2H), 8.09 (m, 1H), 8.23 (m, 3H), 8.38 (m, 3H), 10.66 (s, 1H), 10.71 (s, 1H); <sup>13</sup>C-NMR (100 MHz, DMSO-d<sub>6</sub>) δ 46.9, 101.7, 109.9, 110.9, 116.8, 119.2, 120.6, 122.0, 123.5, 124.6, 129.1, 129.9, 130.1, 131.2, 131.7, 133.9, 134.4, 136.1, 140.2, 143.1, 149.0, 150.7, 151.1, 163.6, 167.8. HPLC: 97.898 %

*4-Chloro-N-(6-oxo-6,7-dihydro-5H-benzimidazo[1,2-d][1,4]benzodiazepin-3-yl)benzamide*  
**(17d)**

Compound **17d** was synthesized as off-white amorphous solid in yield of 30%, mp – 188-191 °C; ESI-MS m/z: 403 (M+1); <sup>1</sup>H NMR (400 MHz, DMSO-d<sub>6</sub>) δ 4.88 (s, 2H), 7.32 (m, 2H), 7.37 (s, 3H), 8.05 (m, 4H), 8.26 (m, 2H), 10.43 (s, 1H), 10.71 (s, 1H); <sup>13</sup>C-NMR (100 MHz, DMSO-d<sub>6</sub>) δ 46.9, 101.6, 109.8, 110.8, 116.9, 119.1, 120.7, 122.0, 124.6, 128.4, 129.5, 130.1, 131.2, 133.5, 134.1, 136.1, 136.3, 140.0, 143.1, 150.6, 151.0, 164.2, 167.9. HPLC: 100 %

*4-Fluoro-N-(6-oxo-6,7-dihydro-5H-benzimidazo[1,2-d][1,4]benzodiazepin-3-yl)benzamide*  
**(17e)**

Compound **17e** was synthesized as off-white amorphous solid in yield of 34%, mp – 184-186 °C; ESI-MS m/z: 387 (M+1); <sup>1</sup>H NMR (400 MHz, DMSO-d<sub>6</sub>) δ 4.98 (s, 2H), 7.31 (s, 2H), 7.40 (t, 2H, *J*=8.4Hz), 7.57 (d, 2H, *J*=6.8Hz), 7.83 (d, 1H, *J*=7.2Hz), 7.95 (s, 1H), 8.09 (d, 3H, *J*=8.0Hz), 10.68 (s, 1H), 10.79 (s, 1H); <sup>13</sup>C-NMR (100 MHz, DMSO-d<sub>6</sub>) δ 46.8, 109.9, 112.6, 115.2, 116.1, 116.6, 119.0, 122.3, 130.5, 132.1, 134.6, 136.7, 141.7, 143.1, 150.4, 162.9, 164.8, 165.4, 166.3, 167.8. HPLC: 95.7 %

*4-Methoxy-N-(6-oxo-6,7-dihydro-5H-benzimidazo[1,2-d][1,4]benzodiazepin-3-yl)benzamide*  
**(17f)**

Compound **17f** was synthesized as off-white amorphous solid in yield of 28%, mp – 191-193 °C; ESI-MS m/z: 399 (M+1); <sup>1</sup>H NMR (400 MHz, DMSO-d<sub>6</sub>) δ 3.83 (s, 3H), 4.96 (s, 2H), 7.09 (s, 2H), 7.11 (s, 2H), 7.29 (t, 1H, *J*=5.6Hz), 7.72 (d, 1H, *J*=7.6Hz), 7.82 (d, 1H, *J*=7.2Hz), 7.93 (s, 1H), 8.00 (m, 1H), 10.48 (s, 1H), 10.73 (s, 1H); <sup>13</sup>C-NMR (100 MHz, DMSO-d<sub>6</sub>) δ 46.8, 55.4, 110.0, 112.5, 113.6, 115.6, 116.5, 118.8, 122.4, 126.5, 129.8, 130.4, 134.5, 136.7, 142.0, 142.9, 150.5, 162.1, 165.2, 167.8. HPLC: 95.8 %

*4-Methyl-N-(6-oxo-6,7-dihydro-5H-benzimidazo[1,2-d][1,4]benzodiazepin-3-yl)benzamide*  
**(17g)**

Compound **17g** was synthesized as off-white amorphous solid in yield of 26%, mp – 176-178 °C; ESI-MS m/z: 383 (M+1); <sup>1</sup>H NMR (400 MHz, DMSO-d<sub>6</sub>) δ 3.36 (s, 3H), 4.95 (s, 2H), 7.28 (d, 2H, *J*=5.6Hz), 7.31 (m, 2H), 7.72 (m, 2H), 7.82 (d, 1H, *J*=7.2Hz), 7.90 (d, 1H, *J*=8.0Hz), 8.05 (d, 1H, *J*=8.4Hz), 10.55 (s, 1H), 10.72 (s, 1H); <sup>13</sup>C-NMR (100 MHz, DMSO-d<sub>6</sub>) δ 21.0, 46.8, 109.9, 112.6, 115.9, 116.6, 119.0, 122.3, 127.8, 128.9, 130.4, 131.6, 134.6, 136.7, 141.8, 141.9, 143.2, 150.5, 165.7, 167.8. HPLC: 98.33 %

*Ethyl-2-oxo-2-((6-oxo-6,7-dihydro-5H-benzimidazo[1,2-d][1,4]benzodiazepin-3-yl)amino)acetate (17h)*

Compound **17h** was synthesized as off-white amorphous solid in yield of 33%, mp – 175-177 °C; ESI-MS m/z: 364 (M+1); <sup>1</sup>H NMR (400 MHz, DMSO-d<sub>6</sub>) δ 1.34 (s, 3H), 4.34 (s, 2H), 4.97 (s, 2H), 7.31 (m, 2H), 7.59 (m, 3H), 8.10 (m, 2H), 10.71 (s, 1H), 10.97 (s, 1H); <sup>13</sup>C-NMR (100 MHz, DMSO-d<sub>6</sub>) δ 13.8, 46.8, 62.3, 101.8, 110.0, 116.6, 116.7, 119.3, 120.5, 122.0, 124.6, 129.9, 130.1, 131.3, 132.0, 132.8, 134.3, 136.1, 140.5, 142.9, 151.0, 151.3, 155.3, 160.7, 167.9. HPLC: 100 %

*4-Methoxy-N-(6-oxo-6,7-dihydro-5H-benzimidazo[1,2-d][1,4]benzodiazepin-3-yl)benzenesulfonamide (17i)*

Compound **17i** was synthesized as yellow amorphous solid in yield of 31%, mp – 203-204 °C; ESI-MS m/z: 435 (M+1); <sup>1</sup>H NMR (400 MHz, DMSO-d<sub>6</sub>) δ 2.34 (s, 3H), 4.92 (s, 2H), 7.06 (dd, 1H, *J*<sub>12</sub>=2.0Hz, *J*<sub>13</sub>= 8.8Hz), 7.10 (s, 1H), 7.14 (m, 2H), 7.32 (m, 2H), 7.79 (m, 2H), 7.90 (d, 1H, *J*=8.8Hz), 10.72 (s, 1H), 10.84 (s, 1H). HPLC: 94.5 %



## Spectral Data for Series 1

### FTIR spectra of 7a

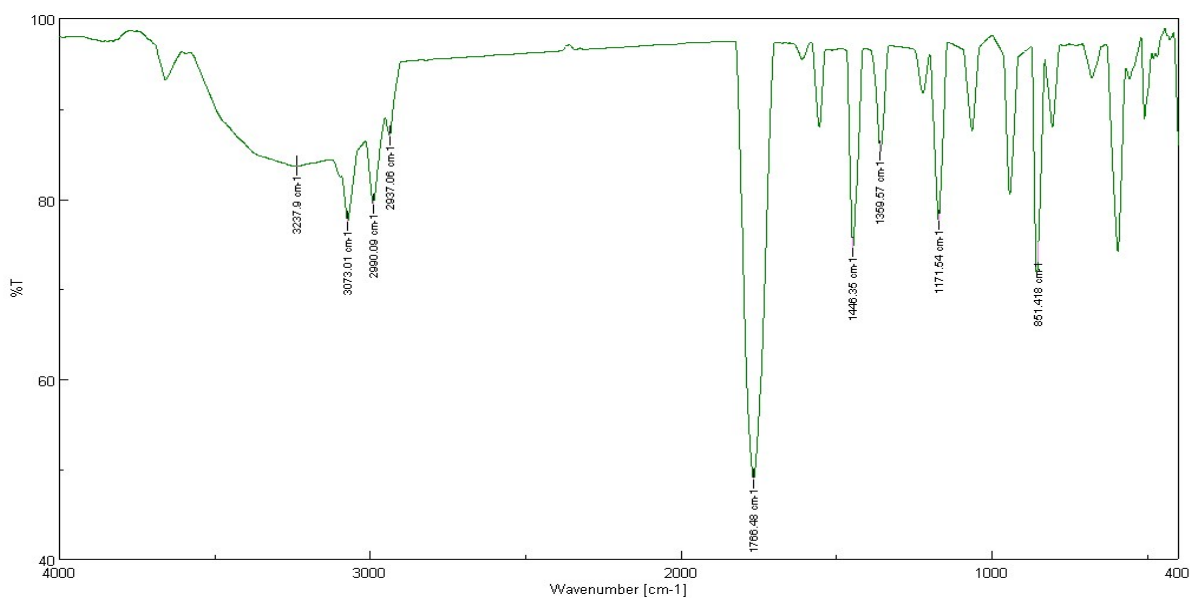

### MASS Analysis of synthesized compound: 7a M+1: 313

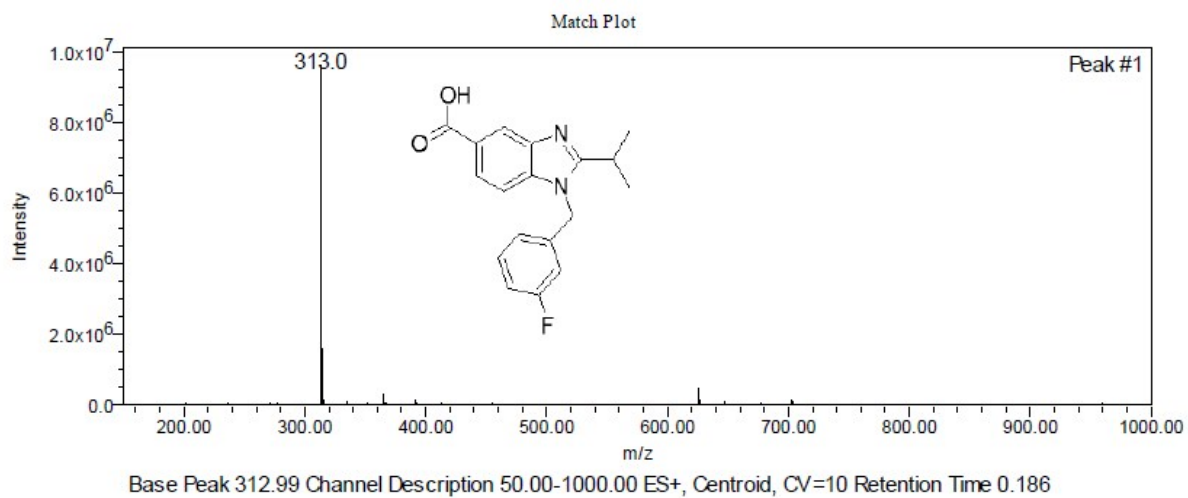

# 1H-NMR Analysis of synthesized compound: 7a

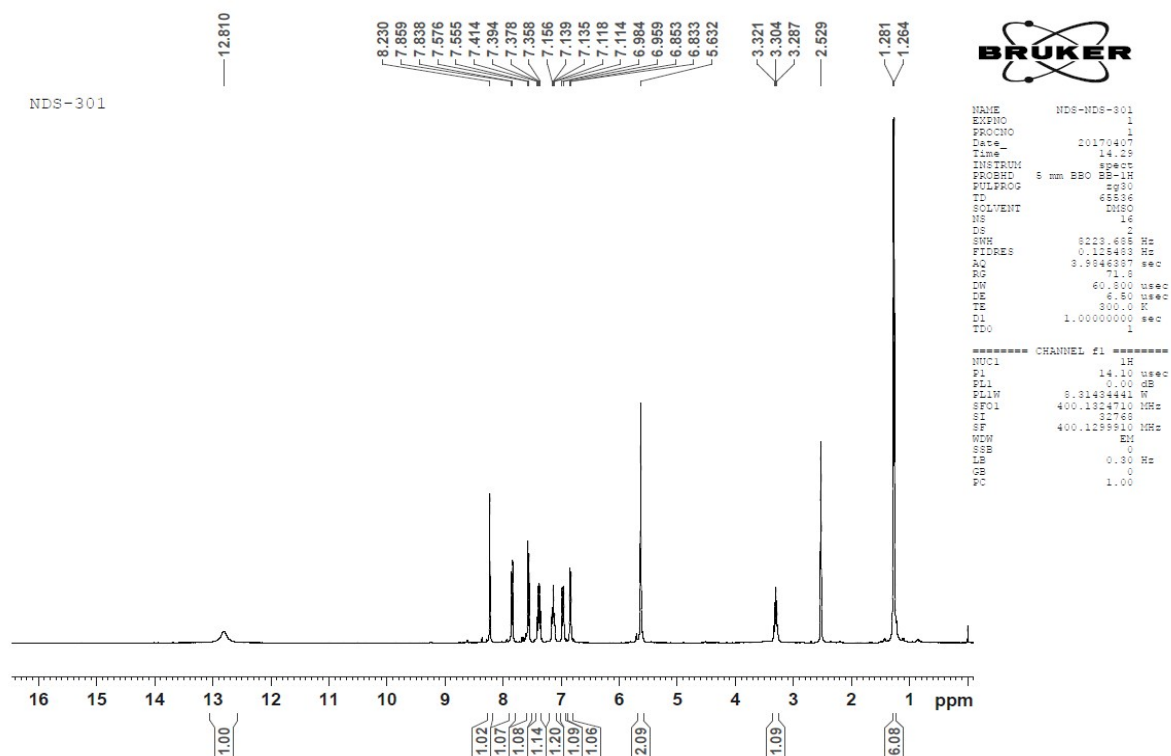

# 13C-NMR Analysis of synthesized compound: 7a

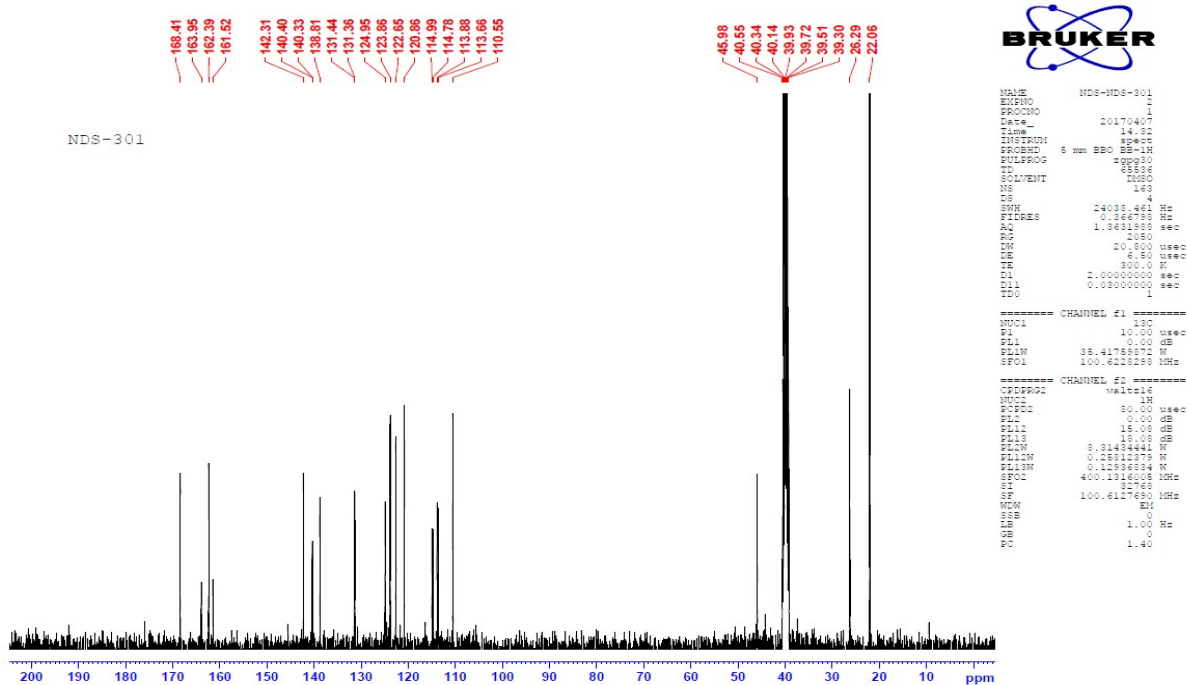

## HPLC (percentage purity) of 7a

Benzimidazole derivatives\_0914 NDS-301\_006 9/16/2017 7:32:49 PM

Institute of Pharmacy, Nirma University

Report - HPLC analysis

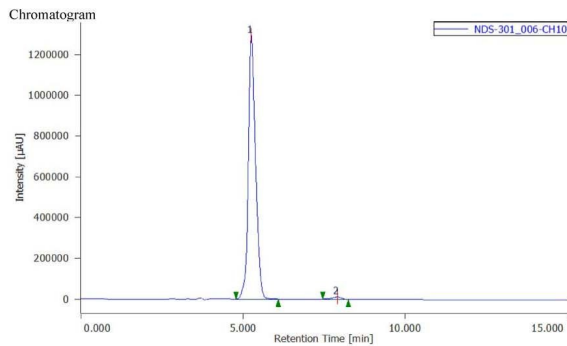

### Chromatogram Information

User Name Administrator  
 Date Modified 9/14/2017 5:23:56 PM  
 Description  
 HPLC System Name Jasco HPLC-4000  
 Injection Date 9/14/2017 12:23:19 PM  
 Volume 20.00 [μL]  
 Sample # 5  
 Project Name DST  
 Acquisition Time 15.0 [min]  
 Acquisition Sequence  
 Control Method 15min6040meohbuffer1.0mlpermin  
 Peak ID Table

### Peak Information

| Peak Name | CH | RT [min] | Area [μV·sec] | Height [μV] | Area%  | Height% | NTP  | Resolution | Symmetry Factor |
|-----------|----|----------|---------------|-------------|--------|---------|------|------------|-----------------|
| 1 Unknown | 10 | 5.253    | 20107710      | 1292811     | 98.860 | 99.104  | 2978 | 5.756      | 1.144           |
| 2 Unknown | 10 | 7.907    | 231779        | 11686       | 1.140  | 0.896   | 3586 | N/A        | 0.847           |

## HPLC (peak purity) of 7a

Benzimidazole derivatives\_0914 NDS-301\_006 9/22/2017 10:53:15 AM

Institute of Pharmacy, Nirma University

Report - HPLC peak purity

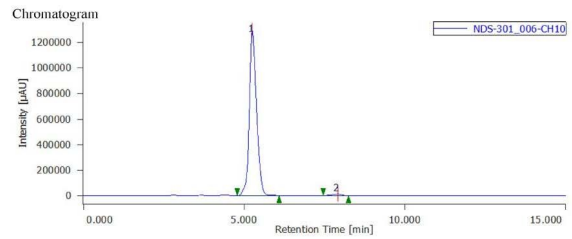

### Peak Purity Info

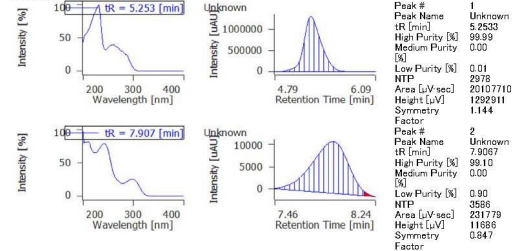

Peak # 1  
 Peak Name Unknown  
 tR [min] 5.2533  
 High Purity [%] 99.99  
 Medium Purity [%] 0.00  
 Low Purity [%] 0.01  
 NTP 2576  
 Area [μV·sec] 20107710  
 Height [μV] 1292811  
 Symmetry Factor 1.144

Peak # 2  
 Peak Name Unknown  
 tR [min] 7.9067  
 High Purity [%] 99.10  
 Medium Purity [%] 0.90  
 Low Purity [%] 0.90  
 NTP 3586  
 Area [μV·sec] 231779  
 Height [μV] 11686  
 Symmetry Factor 0.847

Single

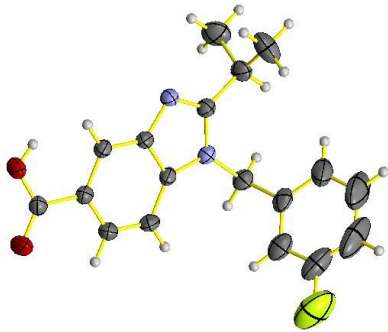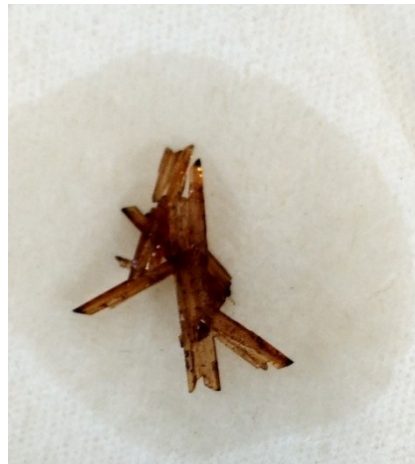

## FTIR spectra of 7b

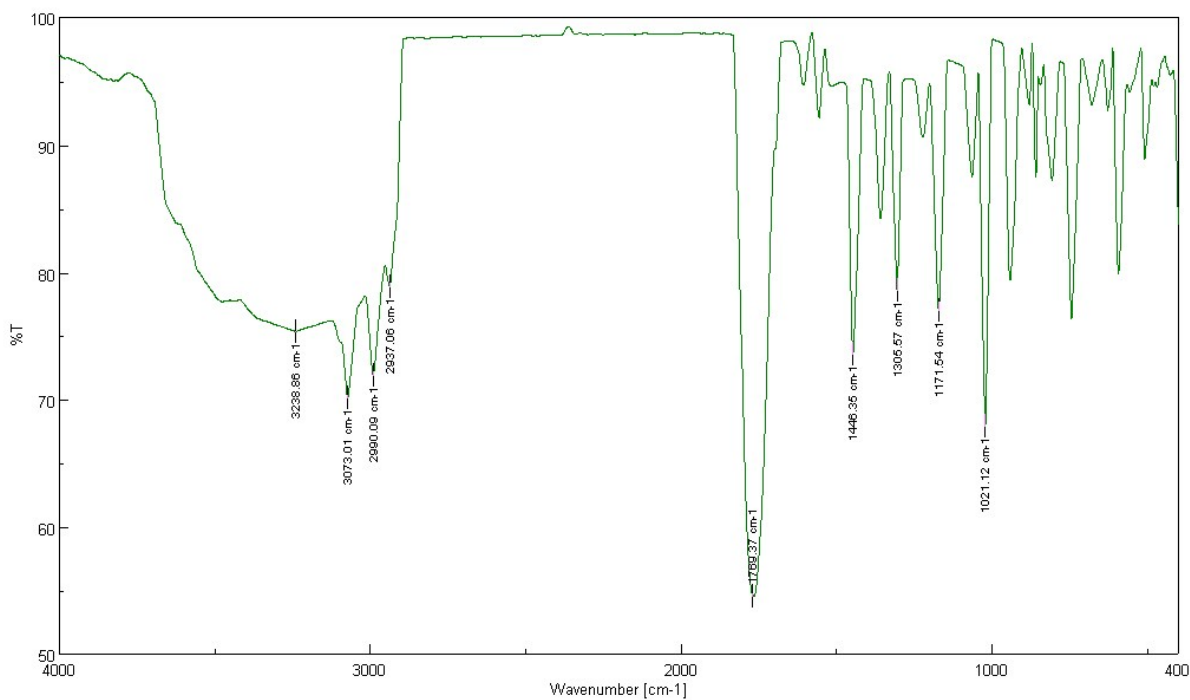

## MASS Analysis of synthesized compound: 7b M+1: 359 and M+3: 361

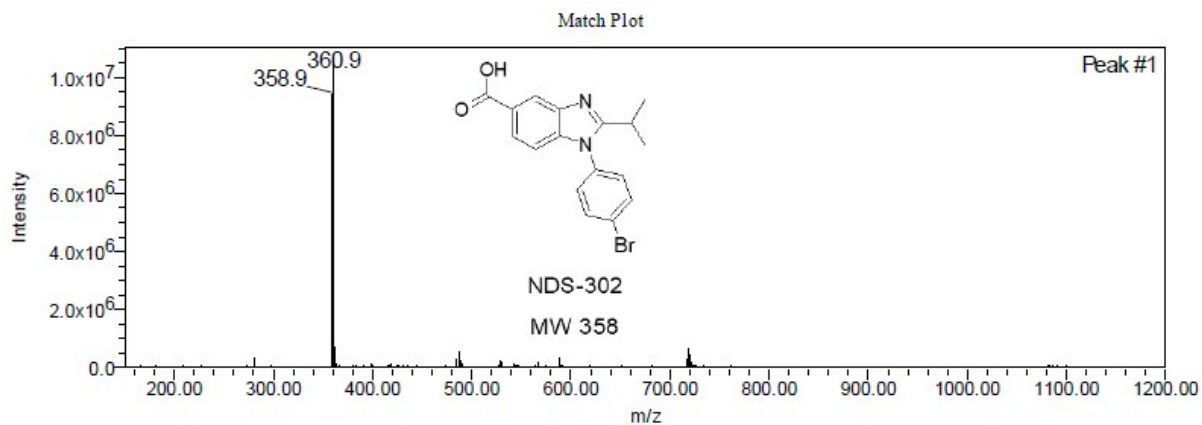

Base Peak 360.90 Channel Description 50.00-1250.00 ES+, Centroid, CV=30 Retention Time 0.137

### 1H-NMR Analysis of synthesized compound: 7b

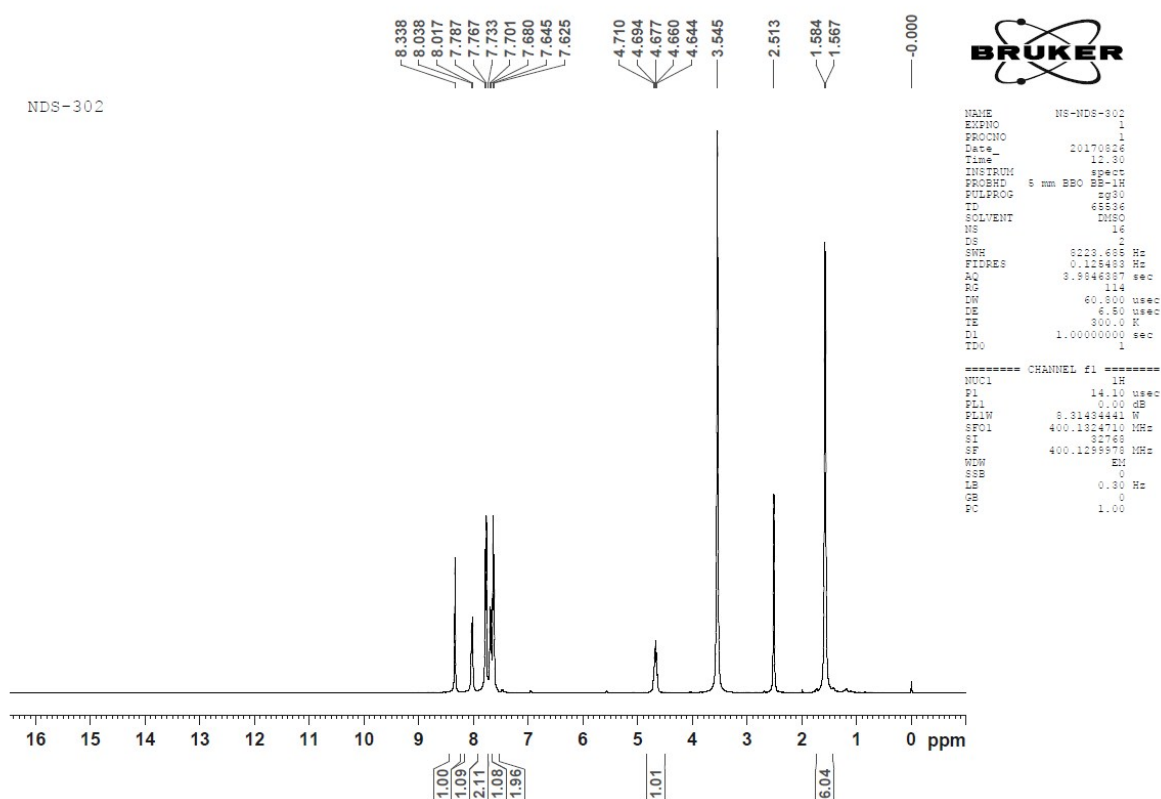

### 1H-NMR-D2O exchange analysis of synthesized compound: 7b

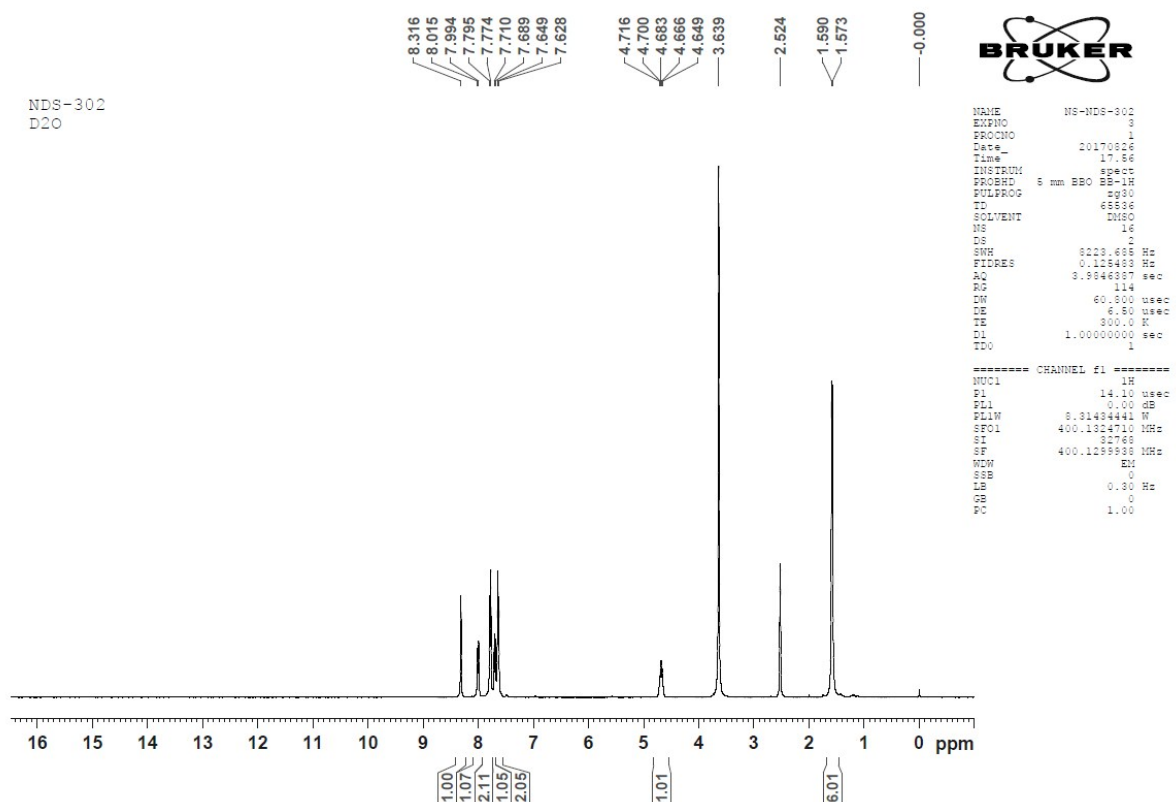

# 13C-NMR Analysis of synthesized compound: 7b

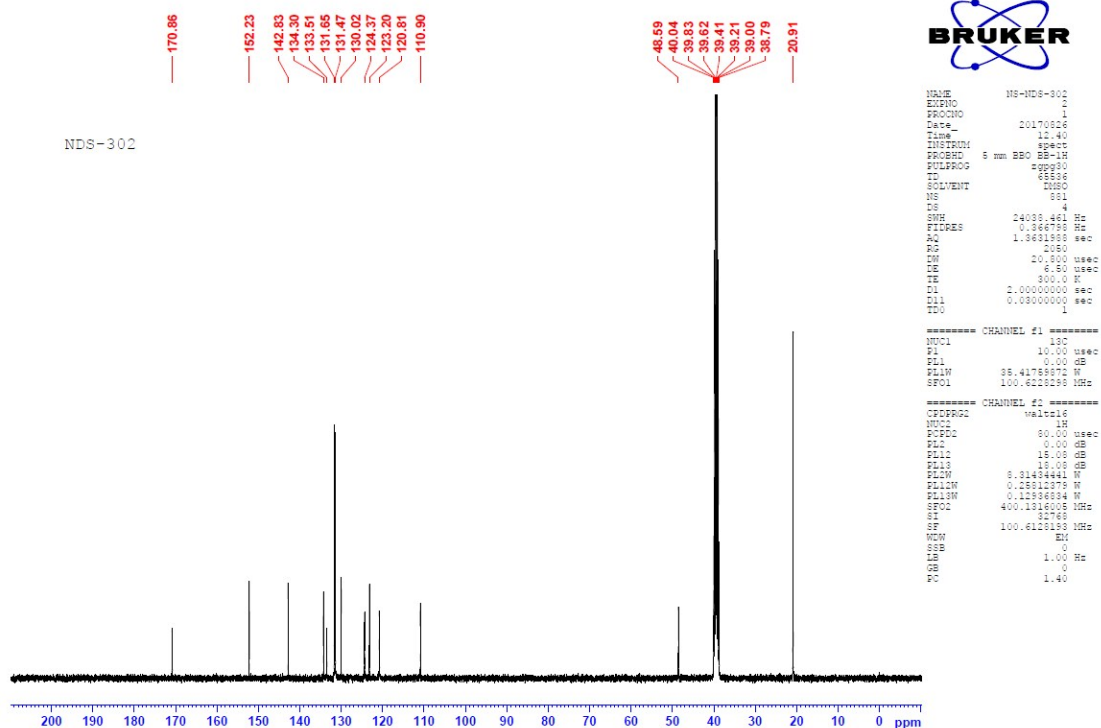

## HPLC (percentage purity) of 7b

Benzimidazolederivatives\_0914\_NDS-302\_004\_9/16/2017 7:32:12 PM

Institute of Pharmacy, Nirma University

Report - HPLC analysis

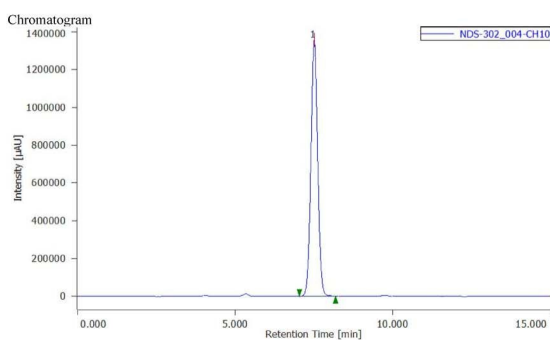

### Chromatogram Information

User Name Administrator  
 Date Modified 9/14/2017 5:23:50 PM  
 Description  
 HPLC System Name Jasco HPLC-4000  
 Injection Date 9/14/2017 11:44:54 AM  
 Volume 20.00 [µL]  
 Sample # 3  
 Project Name DST  
 Acquisition Time 15.0 [min]  
 Acquisition Sequence  
 Control Method 15min6040meohbuffer1.0mlpermin  
 Peak ID Table

### Peak Information

| # | Peak Name | CH | RT [min] | Area [µV*sec] | Height [µV] | Area%   | Height% | NTC  | Resolution | Symmetry Factor |
|---|-----------|----|----------|---------------|-------------|---------|---------|------|------------|-----------------|
| 1 | Unknown   | 10 | 7.507    | 20176384      | 1364597     | 100.000 | 100.000 | 6105 | N/A        | 1.032           |

## HPLC (peak purity) of 7b

Benzimidazolederivatives\_0914\_NDS-302\_004\_9/22/2017 10:52:37 AM

Institute of Pharmacy, Nirma University

Report - HPLC peak purity

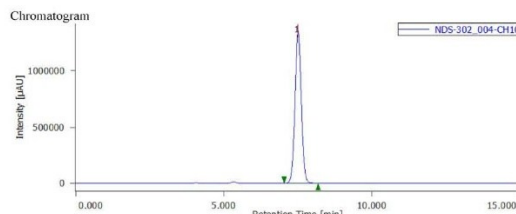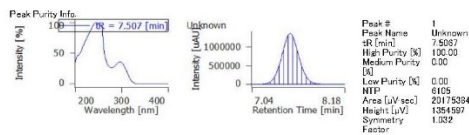

## FTIR spectra of 7c

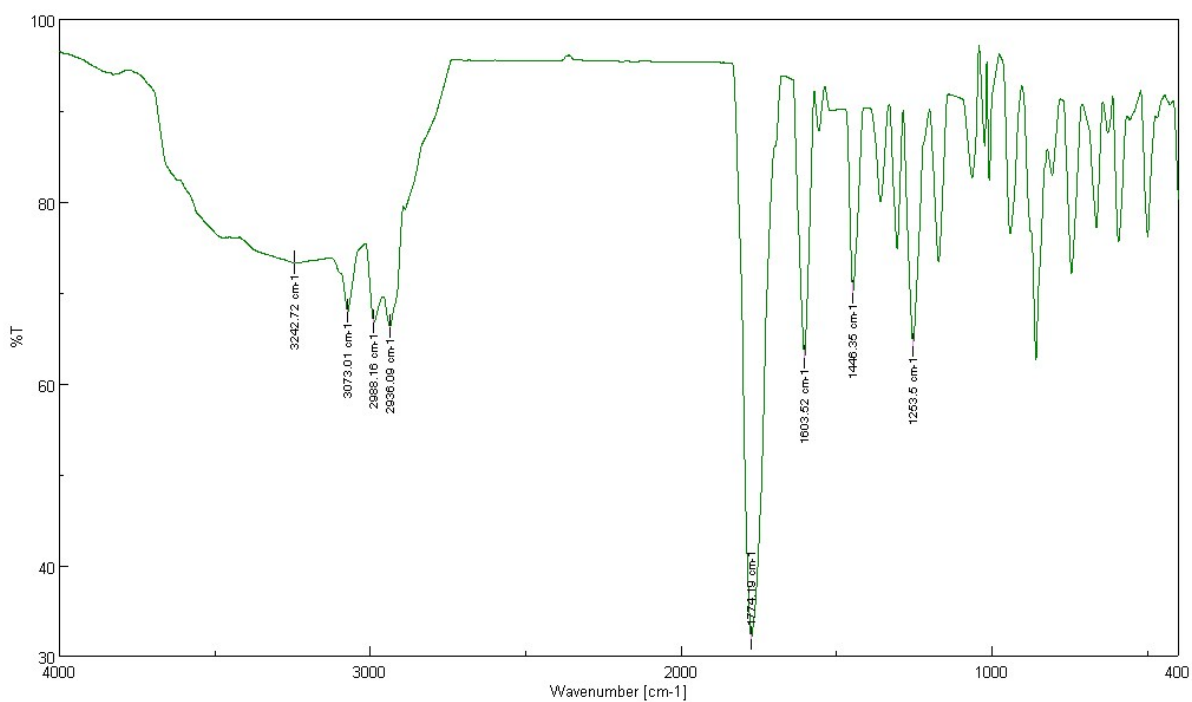

## MASS Analysis of synthesized compound: 7c M+1: 326

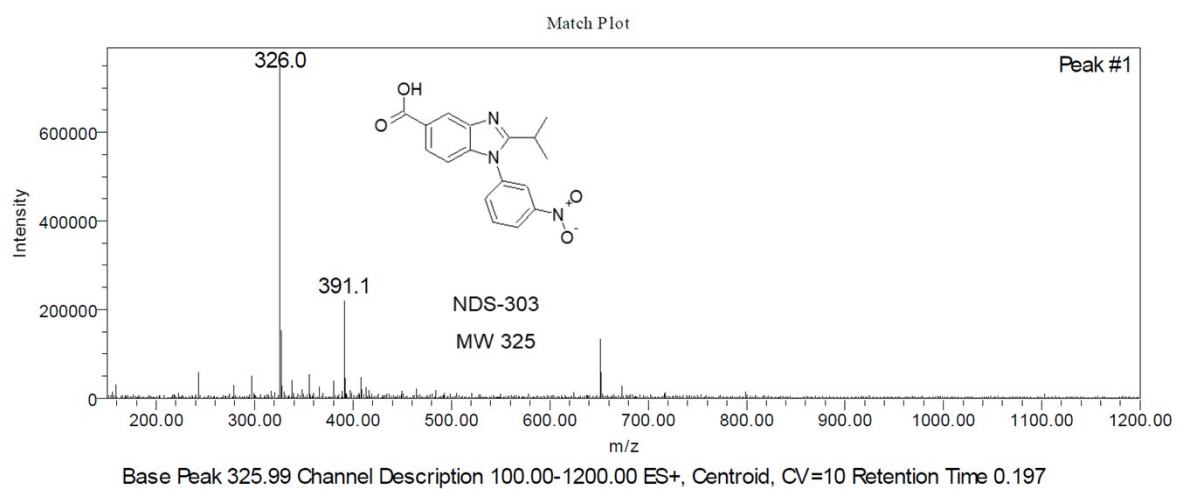

# 1H-NMR Analysis of synthesized compound: 7c

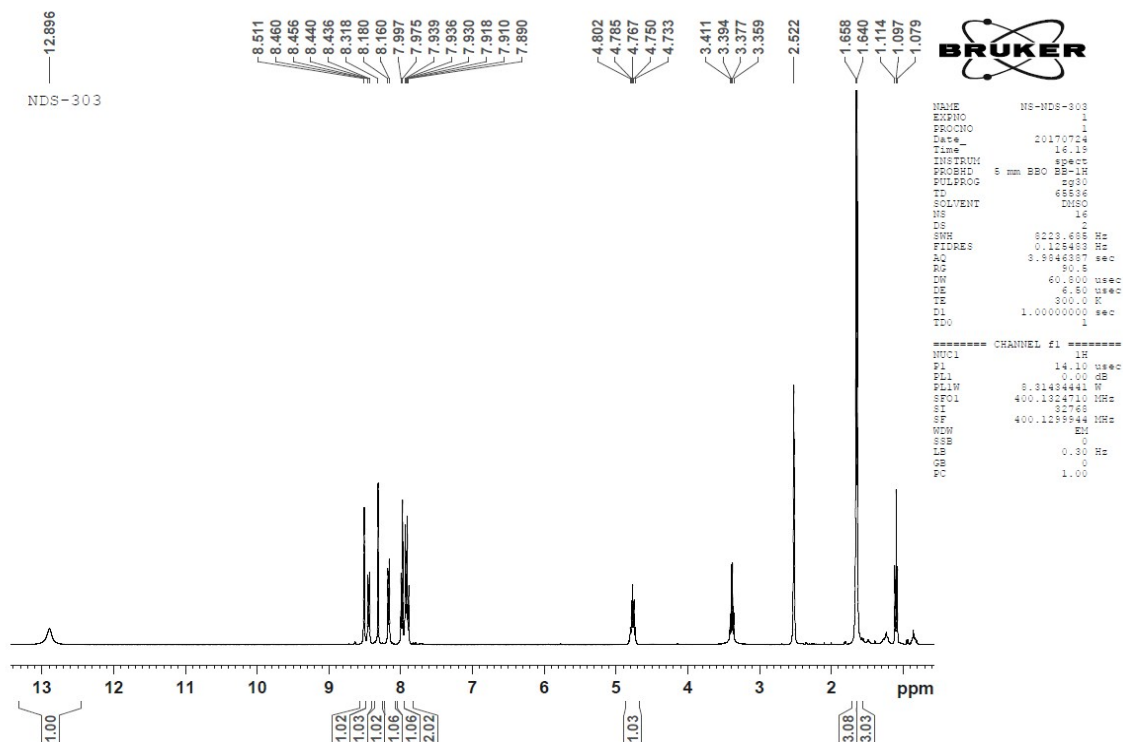

# 1H-NMR-D2O exchange analysis of synthesized compound: 7c

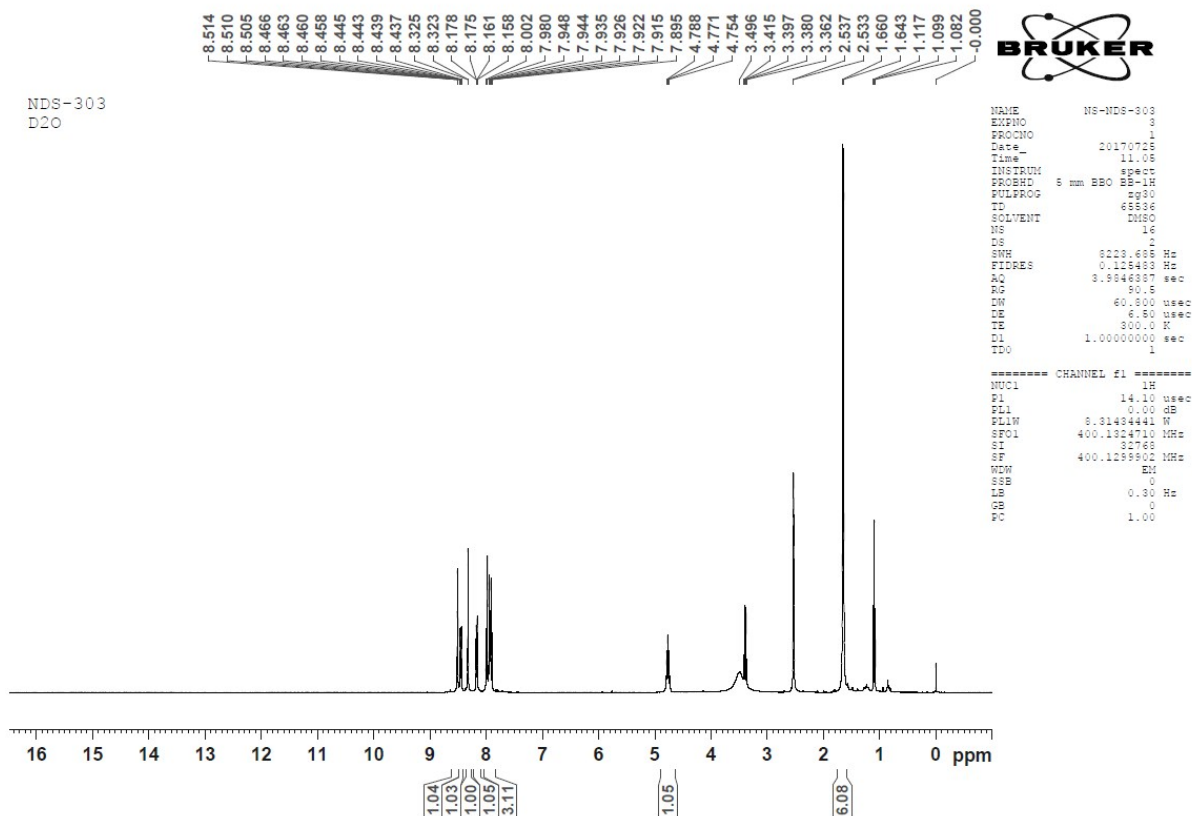





## FTIR spectra of 7d

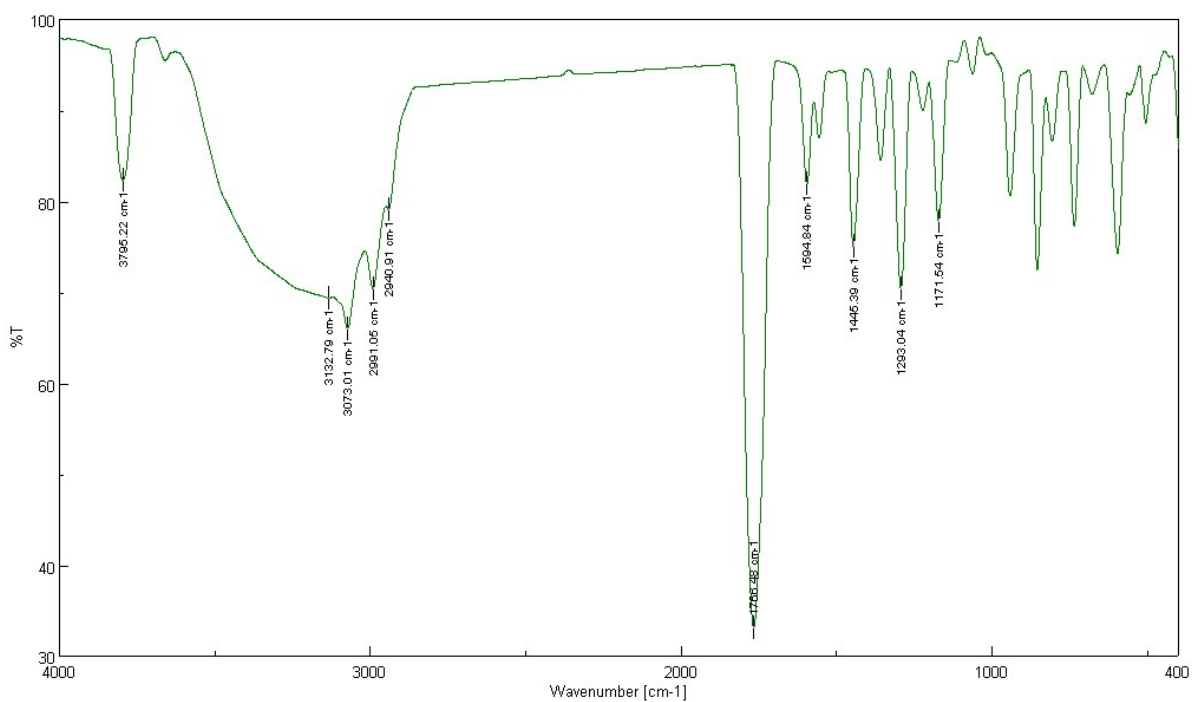

## MASS Analysis of synthesized compound: 7d M+1: 297

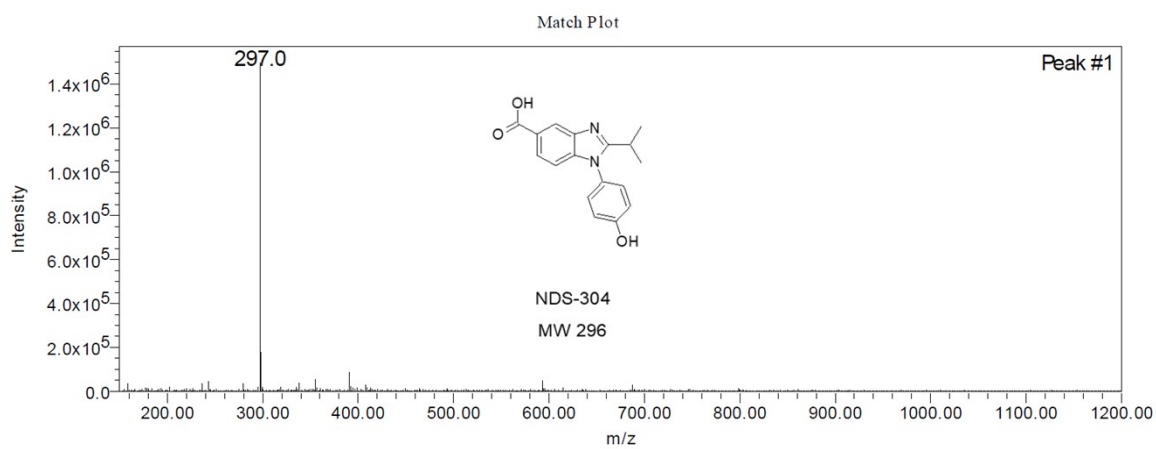

Base Peak 297.05 Channel Description 100.00-1200.00 ES+, Centroid, CV=10 Retention Time 0.186

# 1H-NMR Analysis of synthesized compound: 7d

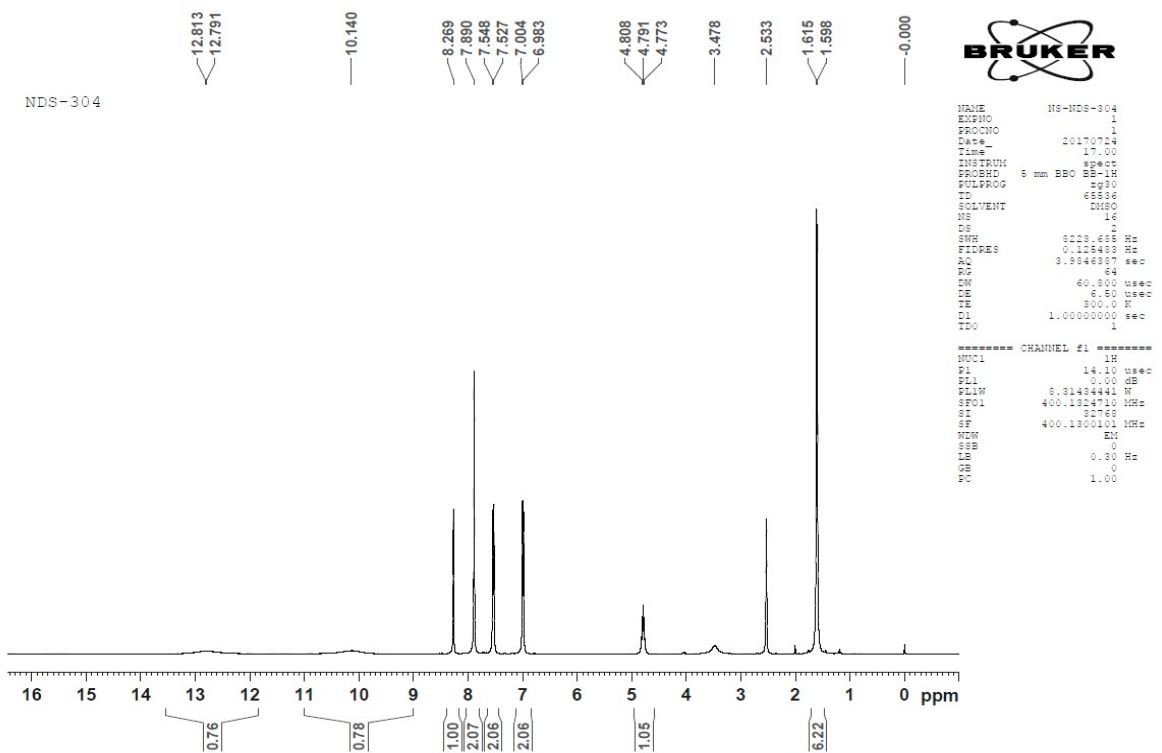

# 1H-NMR-D2O exchange analysis of synthesized compound: 7d

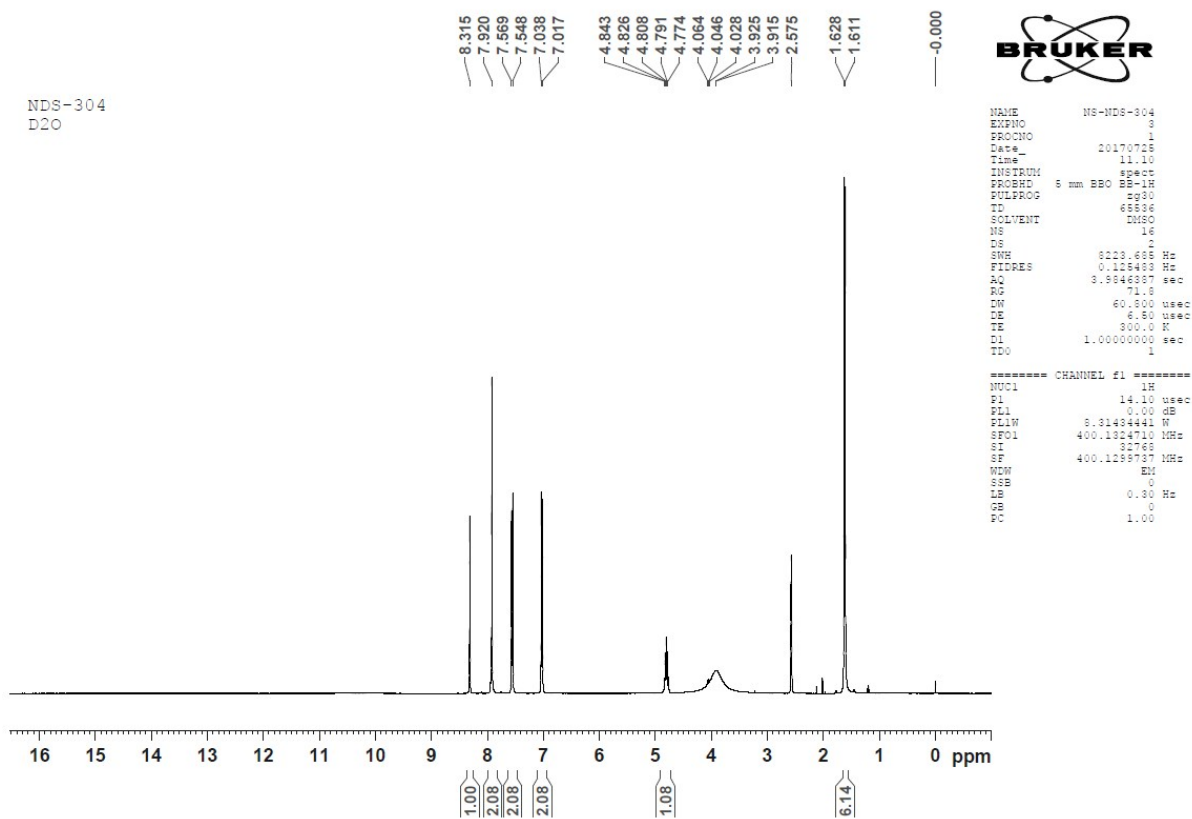

# 13C-NMR Analysis of synthesized compound: 7d

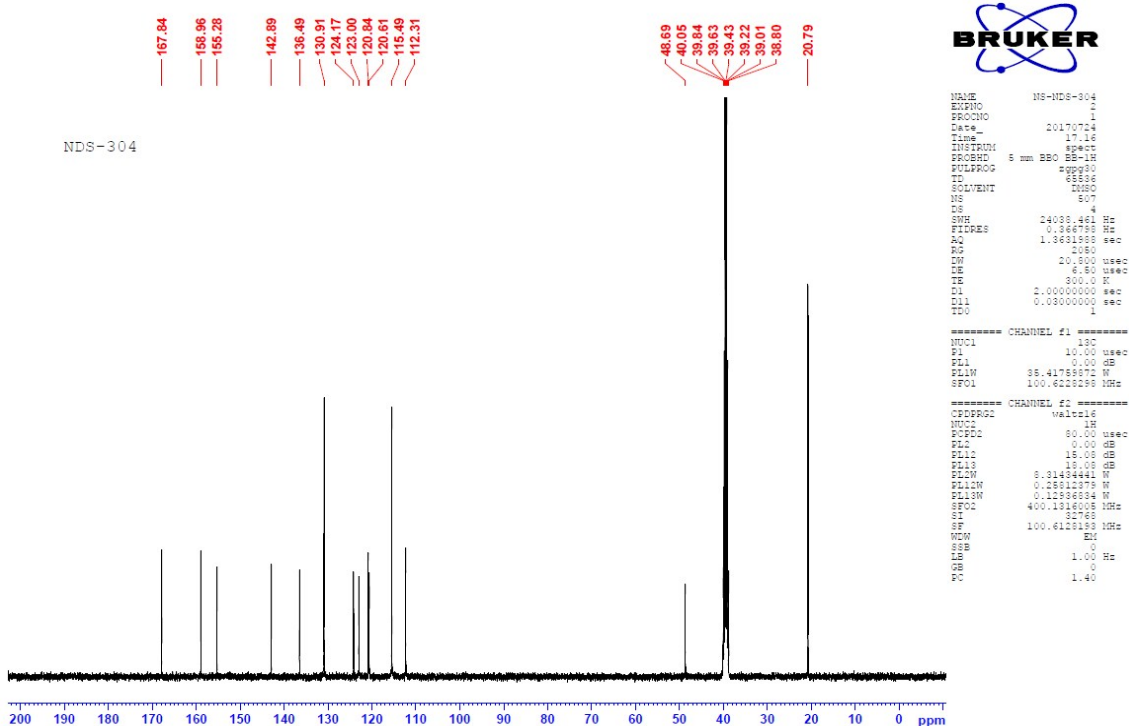

| HPLC (percentage purity) of 7d                                                                                                                                                                                                                                                                                                                                                                                                                                                                                                                                                                                                                                                                                                                                                                                                                                                                                                                                                                                                                                                                                                                                                  | HPLC (peak purity) of 7d |           |                 |                   |                |             |              |             |                 |                 |                 |   |         |    |       |          |         |         |         |      |     |       |                                                                                                                                                                                                                                                                                                                                                                                                                                                                                                                                                                                                                                                                           |        |           |          |                 |                   |                |     |              |             |                 |   |         |        |       |      |      |      |          |         |       |
|---------------------------------------------------------------------------------------------------------------------------------------------------------------------------------------------------------------------------------------------------------------------------------------------------------------------------------------------------------------------------------------------------------------------------------------------------------------------------------------------------------------------------------------------------------------------------------------------------------------------------------------------------------------------------------------------------------------------------------------------------------------------------------------------------------------------------------------------------------------------------------------------------------------------------------------------------------------------------------------------------------------------------------------------------------------------------------------------------------------------------------------------------------------------------------|--------------------------|-----------|-----------------|-------------------|----------------|-------------|--------------|-------------|-----------------|-----------------|-----------------|---|---------|----|-------|----------|---------|---------|---------|------|-----|-------|---------------------------------------------------------------------------------------------------------------------------------------------------------------------------------------------------------------------------------------------------------------------------------------------------------------------------------------------------------------------------------------------------------------------------------------------------------------------------------------------------------------------------------------------------------------------------------------------------------------------------------------------------------------------------|--------|-----------|----------|-----------------|-------------------|----------------|-----|--------------|-------------|-----------------|---|---------|--------|-------|------|------|------|----------|---------|-------|
| <p><i>Benzimidazole derivatives_0814 NDS-304_003 9/16/2017 7:31:37 PM</i></p> <p><b>Institute of Pharmacy, Nirma University</b></p> <p>Report - HPLC analysis</p> <p>Chromatogram Information</p> <p>User Name Administrator<br/>           Date Modified 9/14/2017 5:23:48 PM<br/>           Description<br/>           HPLC System Name Jasco HPLC-4000<br/>           Injection Date 9/14/2017 11:28:04 AM<br/>           Volume 20.00 [µL]<br/>           Sample # 2<br/>           Project Name DST<br/>           Acquisition Time 15.0 [min]<br/>           Acquisition Sequence<br/>           Control Method 15min6040meohbuffer1.0mlpermin<br/>           Peak ID Table</p> <p><b>Peak Information</b></p> <table border="1"> <thead> <tr> <th>#</th> <th>Peak Name</th> <th>CH</th> <th>IR [min]</th> <th>Area [µVsec]</th> <th>Height [µV]</th> <th>Area%</th> <th>Height%</th> <th>NTP</th> <th>Resolution</th> <th>Symmetry Factor</th> </tr> </thead> <tbody> <tr> <td>1</td> <td>Unknown</td> <td>10</td> <td>4.190</td> <td>15686190</td> <td>1232823</td> <td>100.000</td> <td>100.000</td> <td>2414</td> <td>N/A</td> <td>1.486</td> </tr> </tbody> </table> | #                        | Peak Name | CH              | IR [min]          | Area [µVsec]   | Height [µV] | Area%        | Height%     | NTP             | Resolution      | Symmetry Factor | 1 | Unknown | 10 | 4.190 | 15686190 | 1232823 | 100.000 | 100.000 | 2414 | N/A | 1.486 | <p><i>Benzimidazole derivatives_0814 NDS-304_003 9/22/2017 10:52:13 AM</i></p> <p><b>Institute of Pharmacy, Nirma University</b></p> <p>Report - HPLC peak purity</p> <p>Peak Purity Info</p> <p>Unknown</p> <table border="1"> <thead> <tr> <th>Peak #</th> <th>Peak Name</th> <th>IR [min]</th> <th>High Purity [%]</th> <th>Medium Purity [%]</th> <th>Low Purity [%]</th> <th>NTP</th> <th>Area [µVsec]</th> <th>Height [µV]</th> <th>Symmetry Factor</th> </tr> </thead> <tbody> <tr> <td>1</td> <td>Unknown</td> <td>4.1900</td> <td>99.99</td> <td>0.01</td> <td>0.00</td> <td>2414</td> <td>15686190</td> <td>1232823</td> <td>1.486</td> </tr> </tbody> </table> | Peak # | Peak Name | IR [min] | High Purity [%] | Medium Purity [%] | Low Purity [%] | NTP | Area [µVsec] | Height [µV] | Symmetry Factor | 1 | Unknown | 4.1900 | 99.99 | 0.01 | 0.00 | 2414 | 15686190 | 1232823 | 1.486 |
| #                                                                                                                                                                                                                                                                                                                                                                                                                                                                                                                                                                                                                                                                                                                                                                                                                                                                                                                                                                                                                                                                                                                                                                               | Peak Name                | CH        | IR [min]        | Area [µVsec]      | Height [µV]    | Area%       | Height%      | NTP         | Resolution      | Symmetry Factor |                 |   |         |    |       |          |         |         |         |      |     |       |                                                                                                                                                                                                                                                                                                                                                                                                                                                                                                                                                                                                                                                                           |        |           |          |                 |                   |                |     |              |             |                 |   |         |        |       |      |      |      |          |         |       |
| 1                                                                                                                                                                                                                                                                                                                                                                                                                                                                                                                                                                                                                                                                                                                                                                                                                                                                                                                                                                                                                                                                                                                                                                               | Unknown                  | 10        | 4.190           | 15686190          | 1232823        | 100.000     | 100.000      | 2414        | N/A             | 1.486           |                 |   |         |    |       |          |         |         |         |      |     |       |                                                                                                                                                                                                                                                                                                                                                                                                                                                                                                                                                                                                                                                                           |        |           |          |                 |                   |                |     |              |             |                 |   |         |        |       |      |      |      |          |         |       |
| Peak #                                                                                                                                                                                                                                                                                                                                                                                                                                                                                                                                                                                                                                                                                                                                                                                                                                                                                                                                                                                                                                                                                                                                                                          | Peak Name                | IR [min]  | High Purity [%] | Medium Purity [%] | Low Purity [%] | NTP         | Area [µVsec] | Height [µV] | Symmetry Factor |                 |                 |   |         |    |       |          |         |         |         |      |     |       |                                                                                                                                                                                                                                                                                                                                                                                                                                                                                                                                                                                                                                                                           |        |           |          |                 |                   |                |     |              |             |                 |   |         |        |       |      |      |      |          |         |       |
| 1                                                                                                                                                                                                                                                                                                                                                                                                                                                                                                                                                                                                                                                                                                                                                                                                                                                                                                                                                                                                                                                                                                                                                                               | Unknown                  | 4.1900    | 99.99           | 0.01              | 0.00           | 2414        | 15686190     | 1232823     | 1.486           |                 |                 |   |         |    |       |          |         |         |         |      |     |       |                                                                                                                                                                                                                                                                                                                                                                                                                                                                                                                                                                                                                                                                           |        |           |          |                 |                   |                |     |              |             |                 |   |         |        |       |      |      |      |          |         |       |

### FTIR spectra of 7e

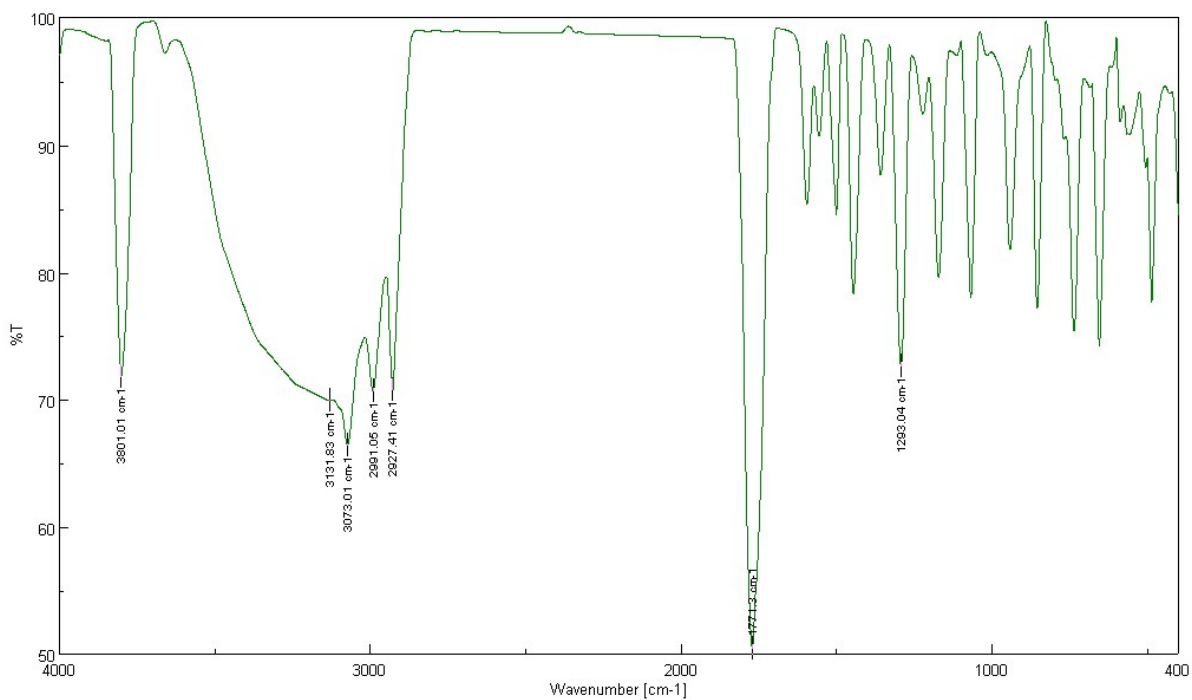

### MASS Analysis of synthesized compound: 7e M+1: 327

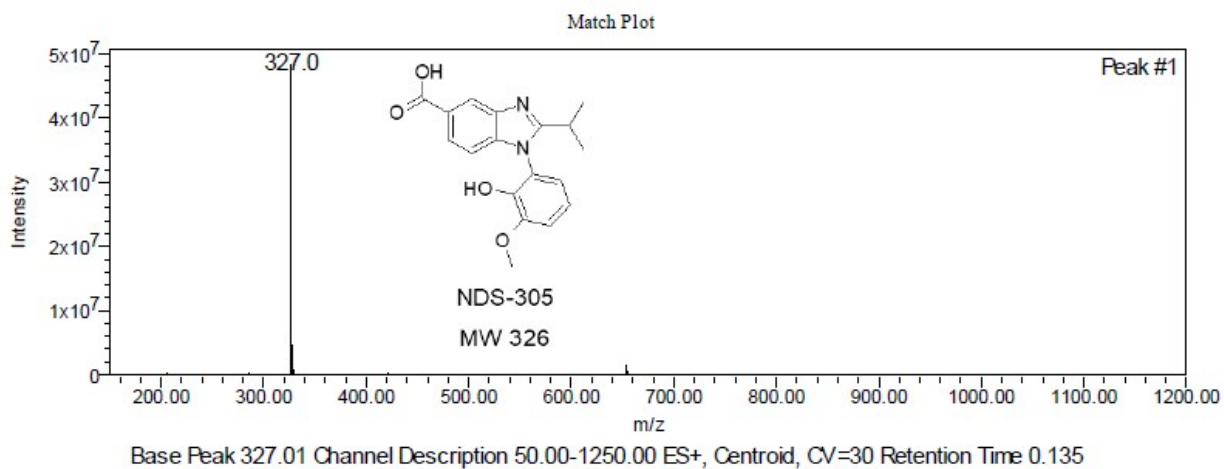

# 1H-NMR Analysis of synthesized compound: 7e

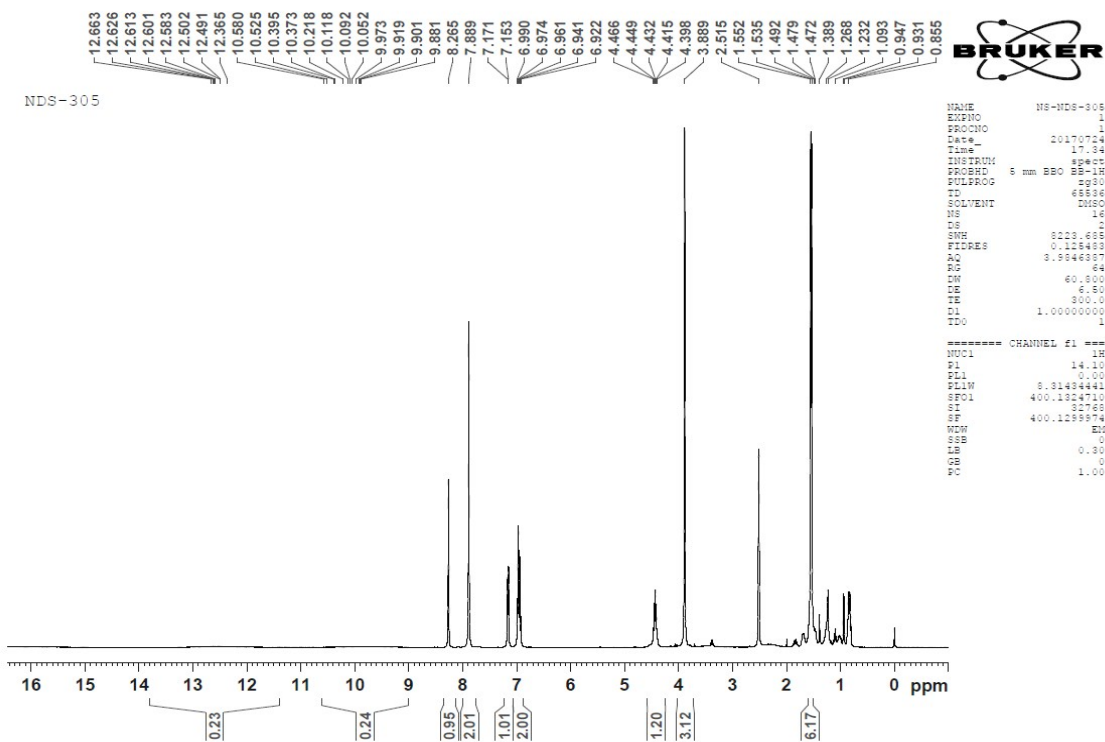

# 1H-NMR-D2O exchange analysis of synthesized compound: 7e

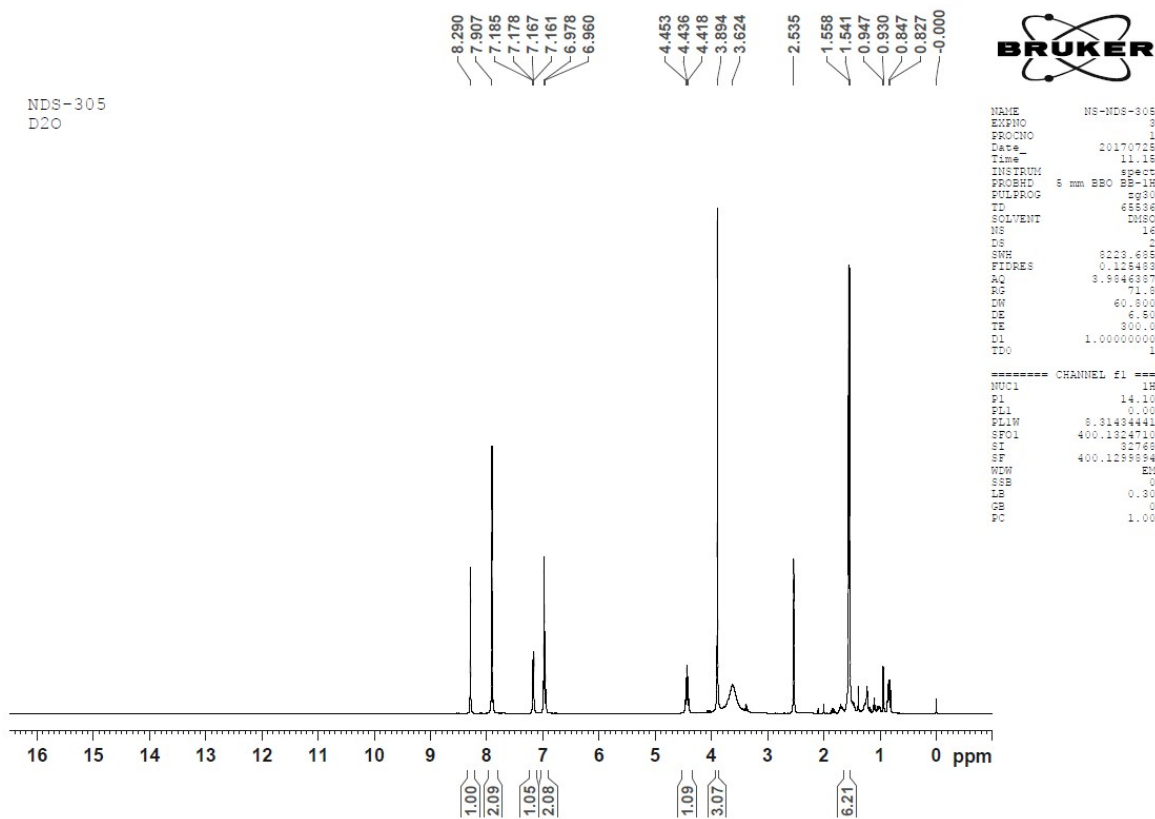

# 13C-NMR Analysis of synthesized compound: 7e

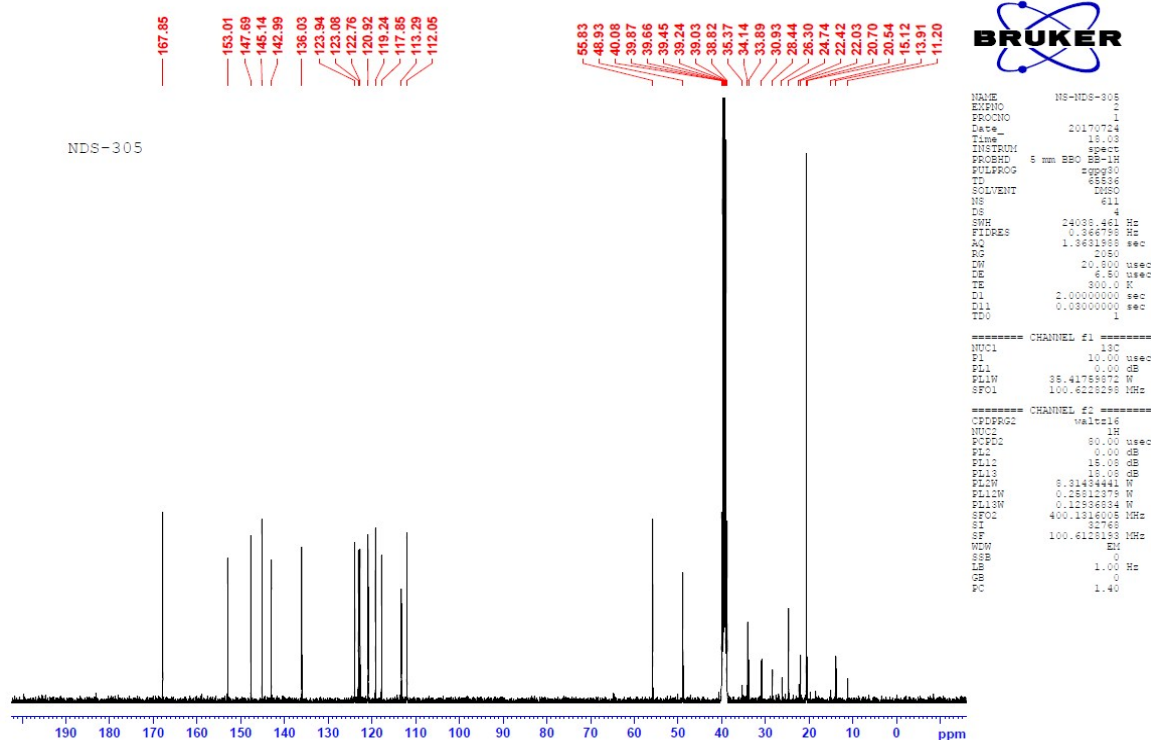

## HPLC (percentage purity) of 7e

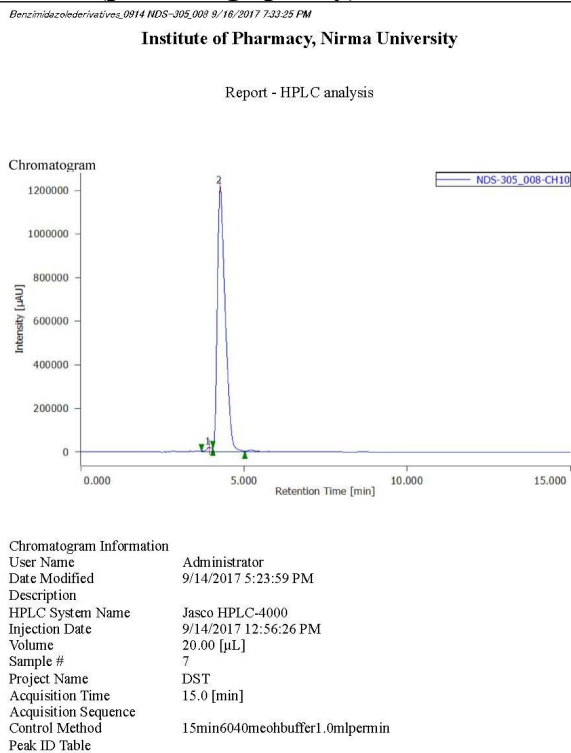

**Peak Information**

| # | Peak Name | CH | RT [min] | Area [µVsec] | Height [µV] | Area%  | Height% | NTP  | Resolution | Symmetry Factor |
|---|-----------|----|----------|--------------|-------------|--------|---------|------|------------|-----------------|
| 1 | Unknown   | 10 | 3.937    | 205872       | 19178       | 1.004  | 1.552   | N/A  | N/A        | N/A             |
| 2 | Unknown   | 10 | 4.270    | 20305922     | 1216782     | 98.996 | 98.448  | 1576 | N/A        | 1.559           |

## HPLC (peak purity) of 7e

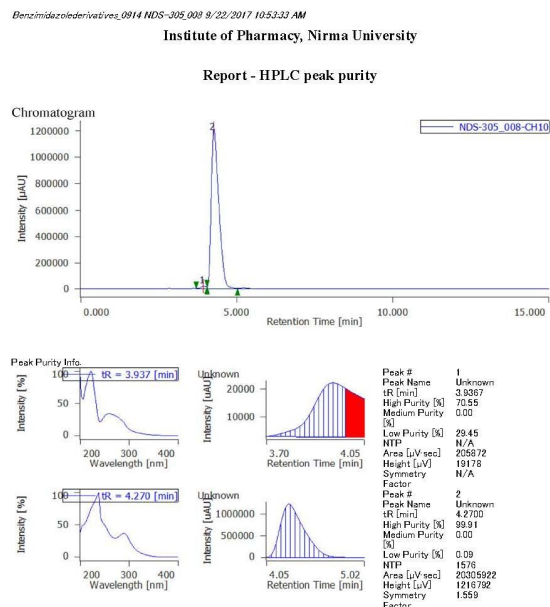

## FTIR spectra of 7f

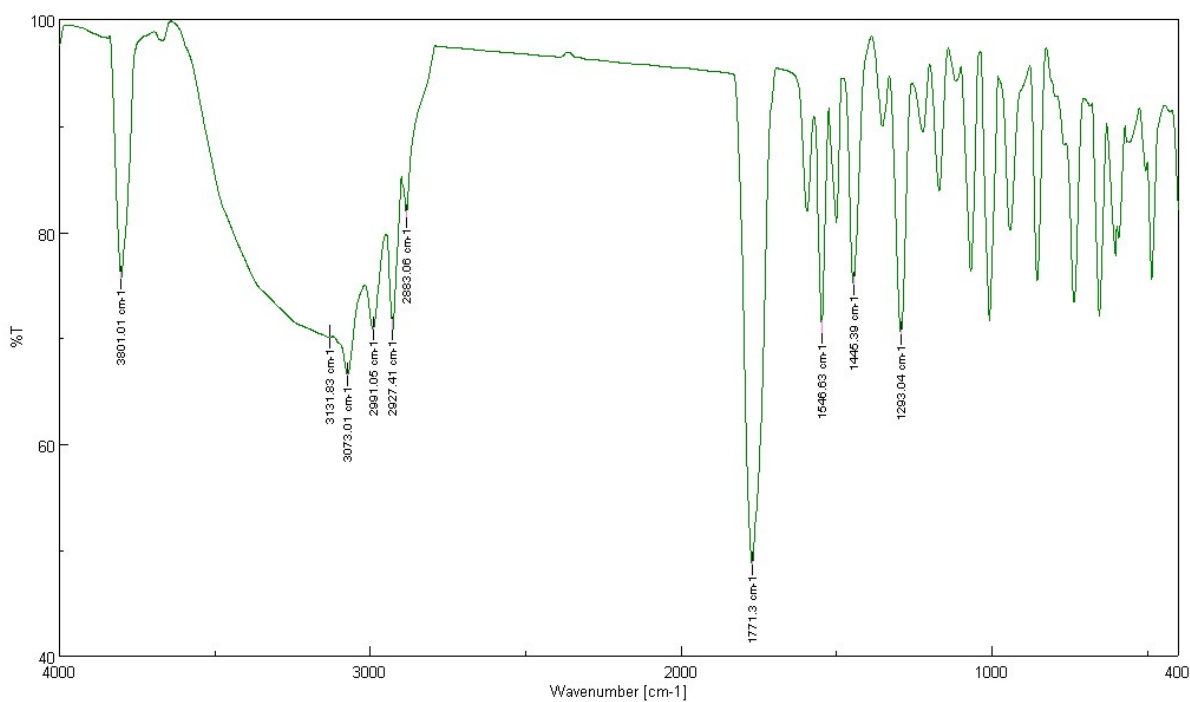

## MASS Analysis of synthesized compound: 7f M+1: 357

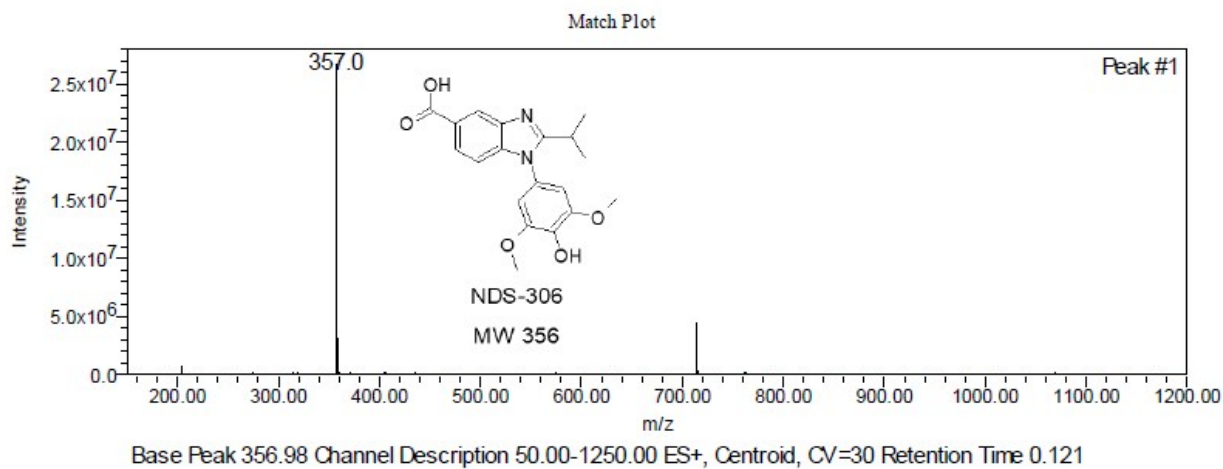



# 1H-NMR Analysis of synthesized compound: 7f

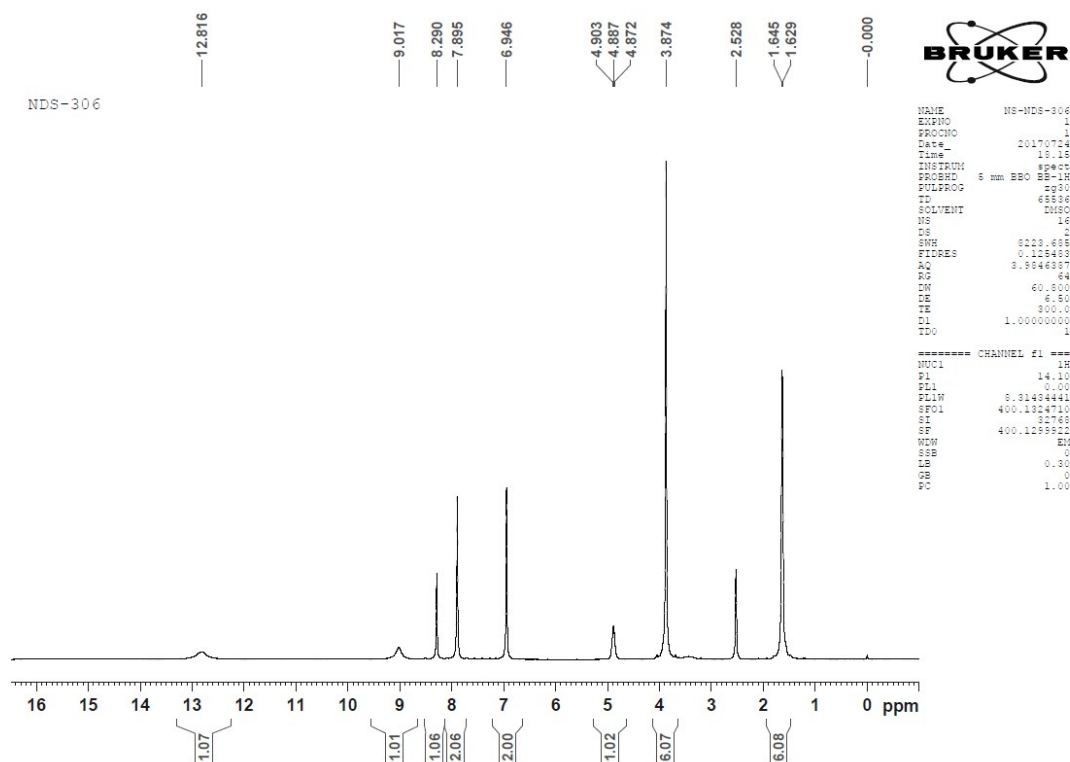

# 1H-NMR-D2O exchange analysis of synthesized compound: 7f

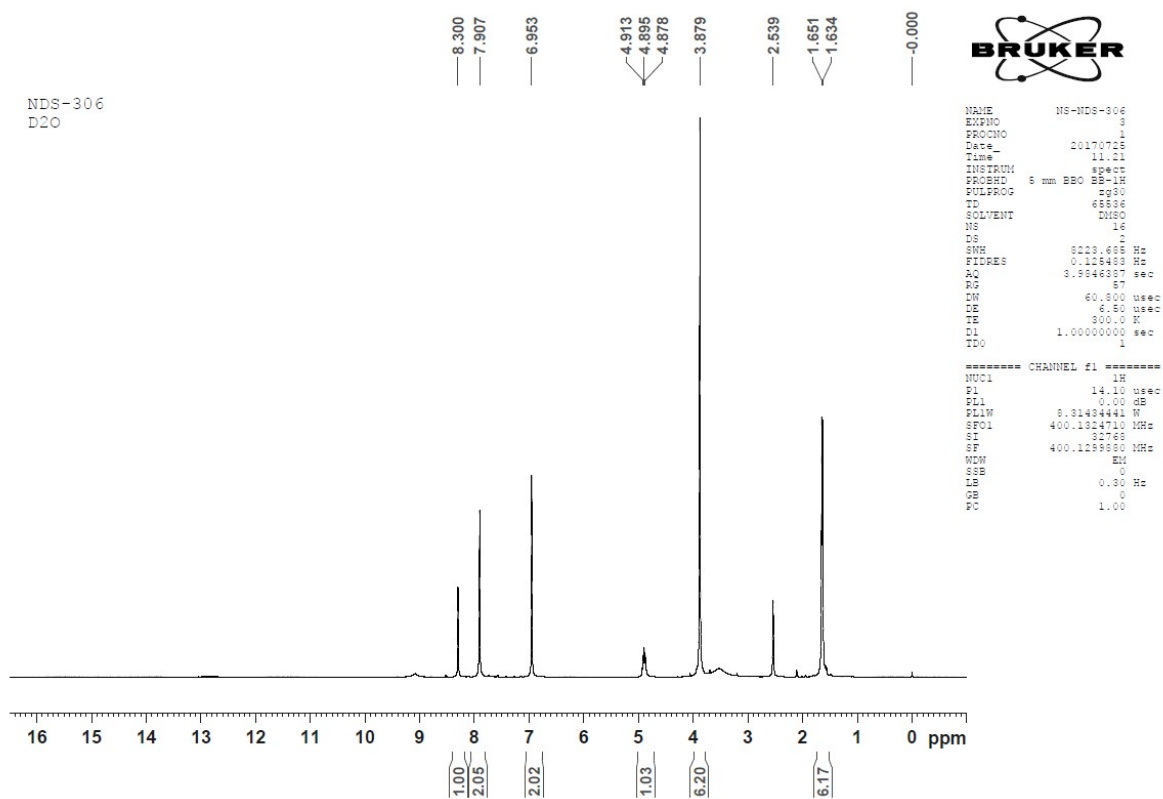

# 13C-NMR Analysis of synthesized compound: 7f

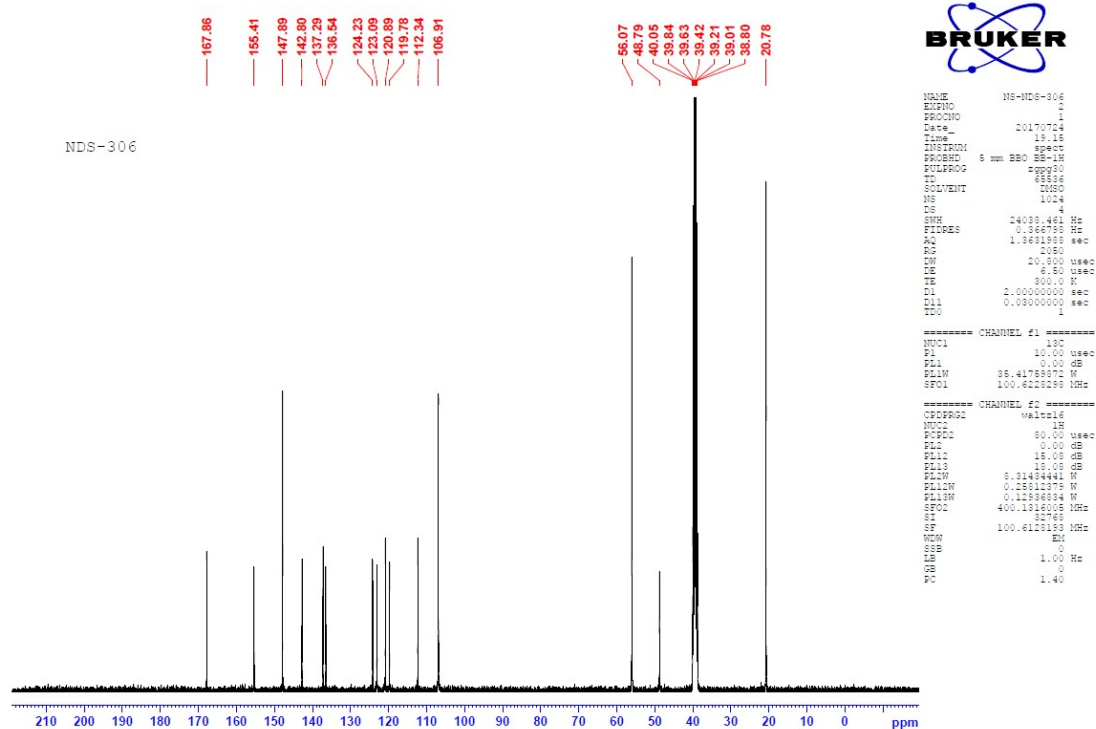

## HPLC (percentage purity) of 7f

Benzimidazolederivatives\_0914 NDS-306\_009 9/16/2017 7:33:56 PM

Institute of Pharmacy, Nirma University

Report - HPLC analysis

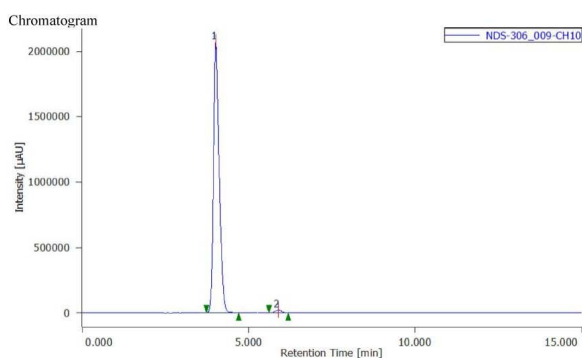

### Chromatogram Information

User Name Administrator  
 Date Modified 9/14/2017 5:24:01 PM  
 Description  
 HPLC System Name Jasco HPLC-4000  
 Injection Date 9/14/2017 1:13:26 PM  
 Volume 20.00 [µL]  
 Sample # 8  
 Project Name DST  
 Acquisition Time 15.0 [min]  
 Acquisition Sequence  
 Control Method 15min6040meohbuffer1.0mlpermin  
 Peak ID Table

### Peak Information

| Peak Name | RT [min] | Area [µVsec] | Height [µV] | Area% | Height% | NTP  | Resolution | Symmetry Factor |
|-----------|----------|--------------|-------------|-------|---------|------|------------|-----------------|
| 1 Unknown | 4.013    | 2445929      | 208930      | 98.73 | 98.893  | 2250 | 5.182      | 1.323           |
| 2 Unknown | 5.893    | 303729       | 23163       | 1.227 | 1.107   | 4605 | N/A        | 0.988           |

## HPLC (peak purity) of 7f

Benzimidazolederivatives\_0914 NDS-306\_009 9/22/2017 10:53:54 AM

Institute of Pharmacy, Nirma University

Report - HPLC peak purity

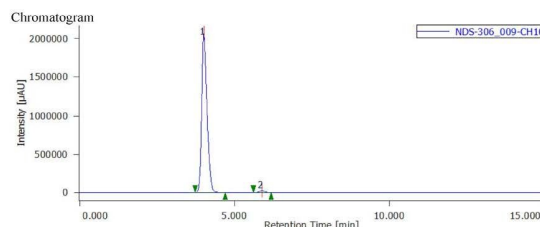

### Peak Purity Info

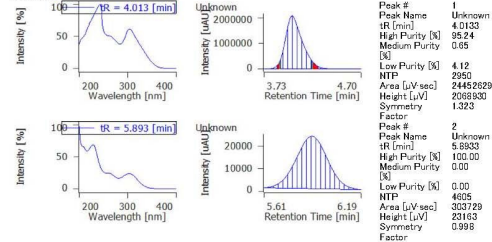

Peak # 1  
 Peak Name Unknown  
 RT [min] 4.013  
 High Purity [%] 98.74  
 Medium Purity [%] 0.65  
 Low Purity [%] 0  
 NTP 2950  
 Area [µVsec] 2445929  
 Height [µV] 208930  
 Symmetry Factor 1.323

Peak # 2  
 Peak Name Unknown  
 RT [min] 5.893  
 High Purity [%] 100.00  
 Medium Purity [%] 0.00  
 Low Purity [%] 0.00  
 NTP 303729  
 Area [µVsec] 23163  
 Height [µV] 23163  
 Symmetry Factor 0.988

## FTIR spectra of 7g

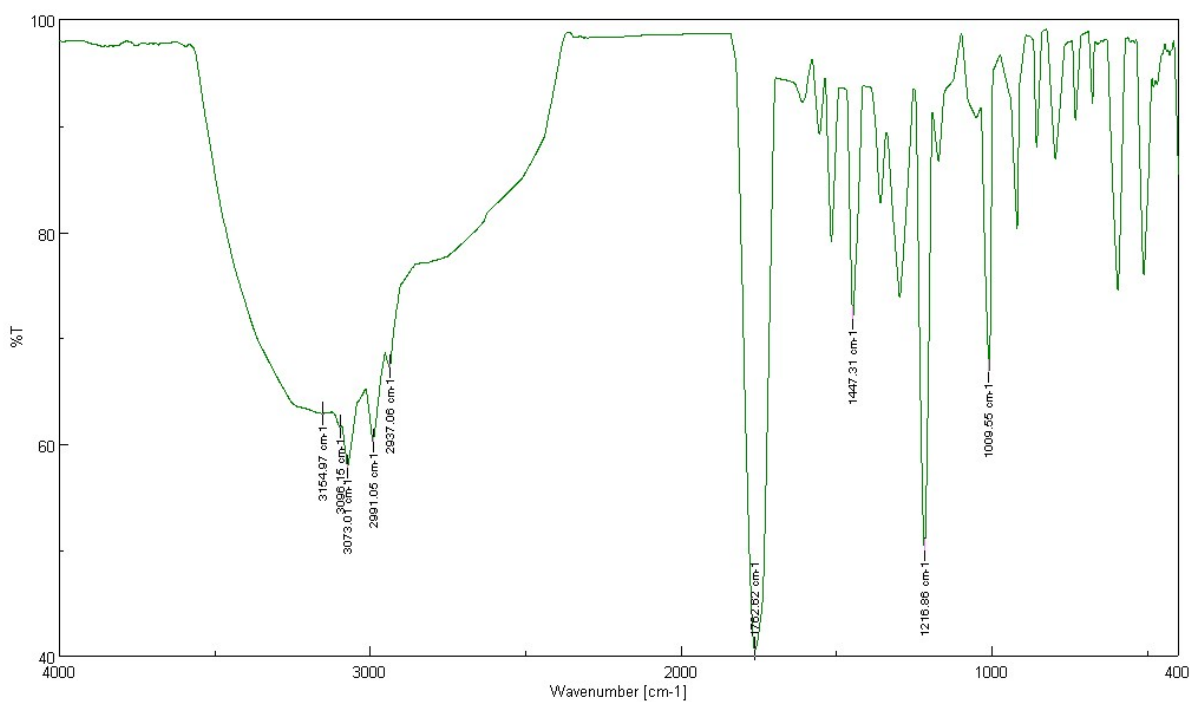

## MASS Analysis of synthesized compound: 7g M+1: 341

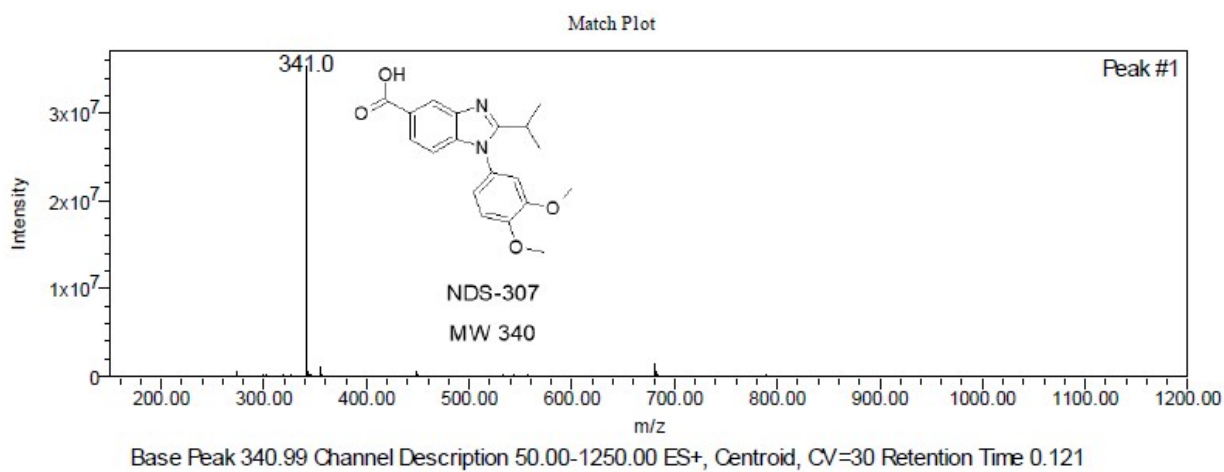

# 1H-NMR Analysis of synthesized compound: 7g

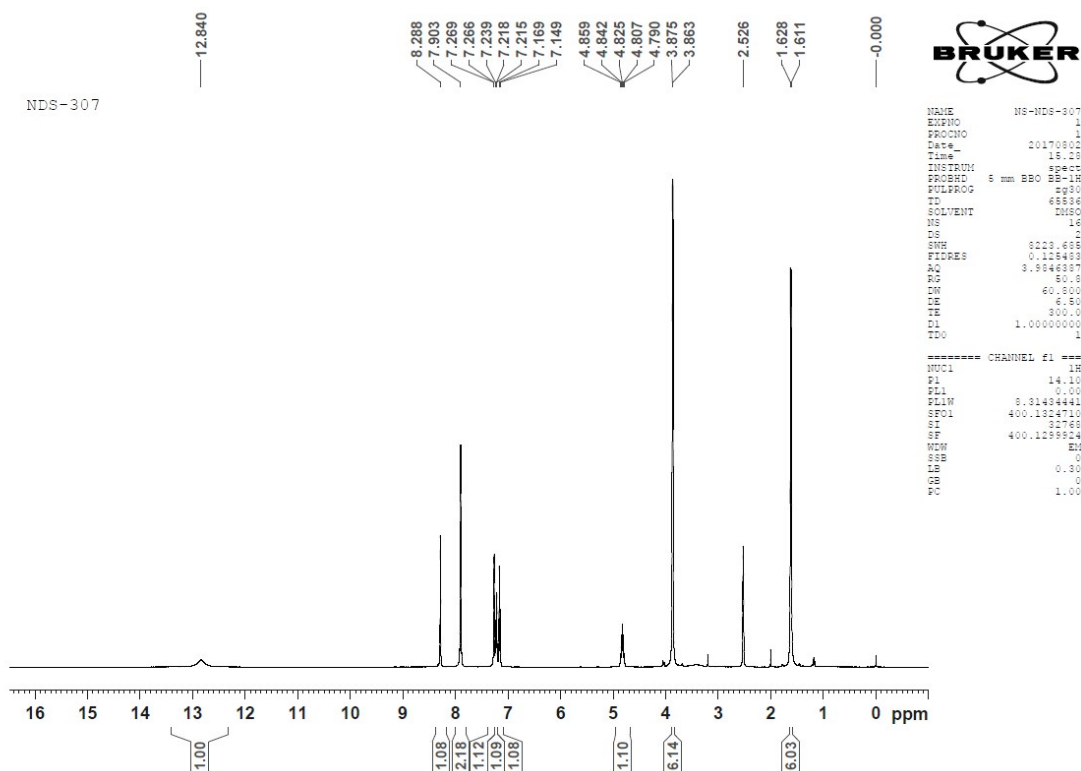

# 1H-NMR-D2O exchange analysis of synthesized compound: 7g

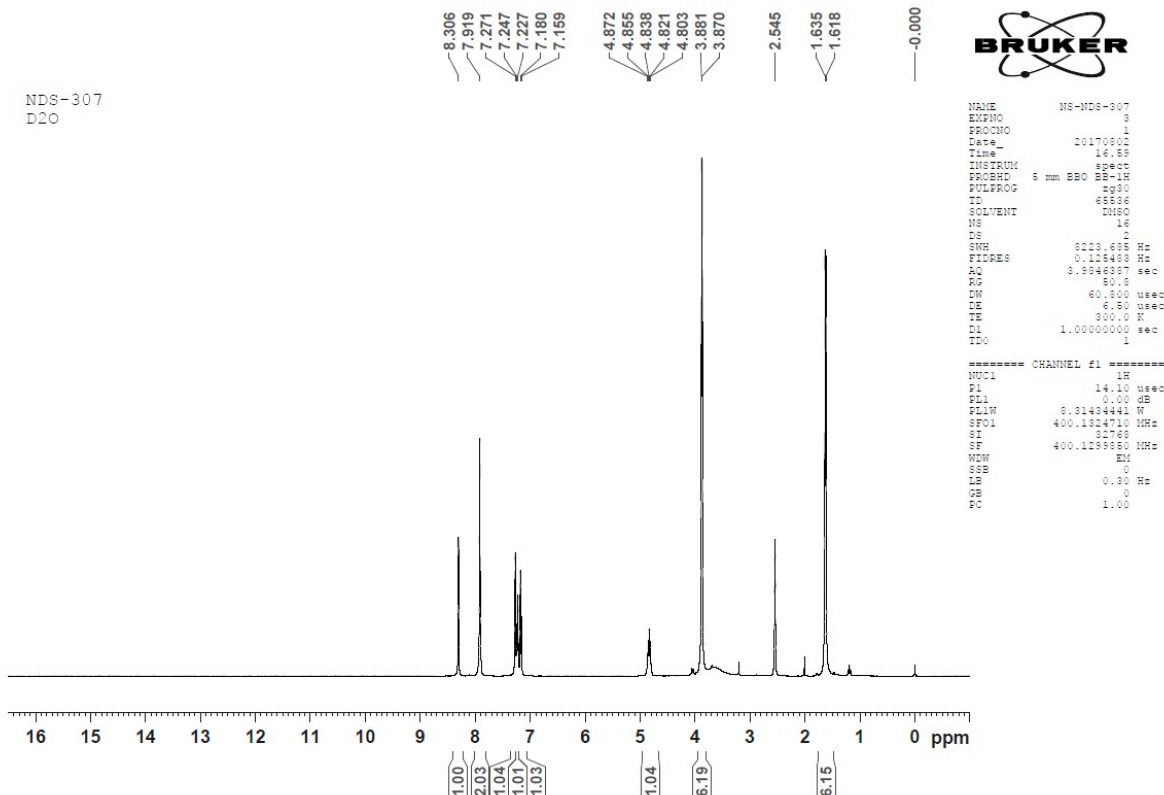

# 13C-NMR Analysis of synthesized compound: 7g

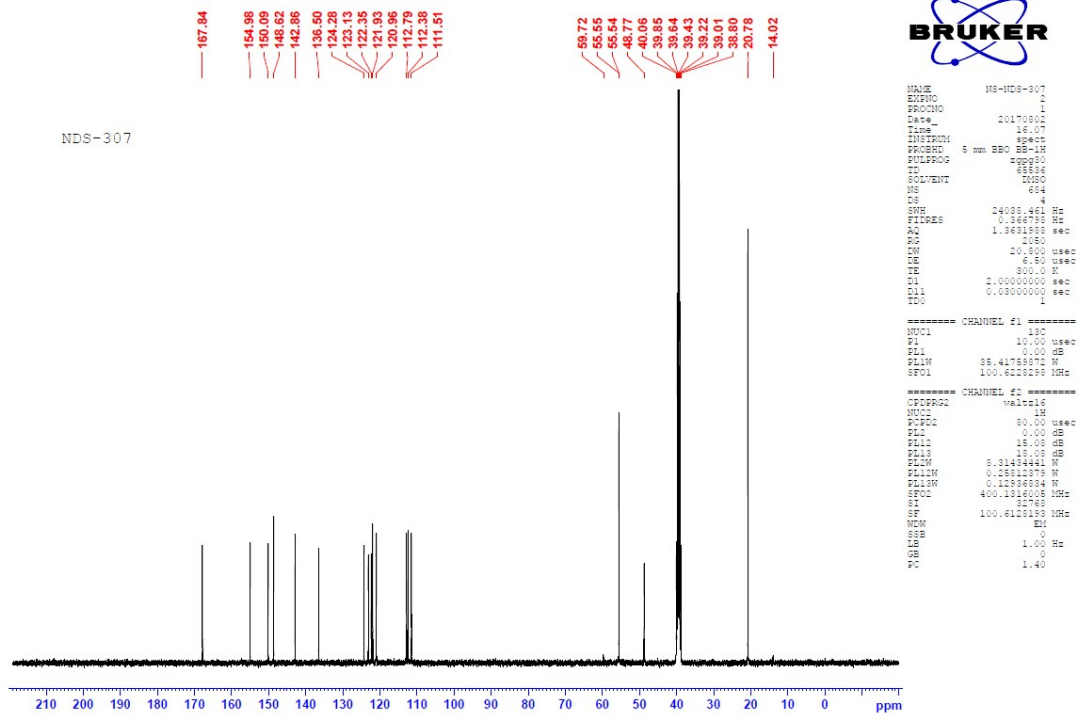

## HPLC (percentage purity) of 7g

Benzimidazolederivatives\_0914 NDS-307\_011 9/16/2017 7:34:22 PM

Institute of Pharmacy, Nirma University

Report - HPLC analysis

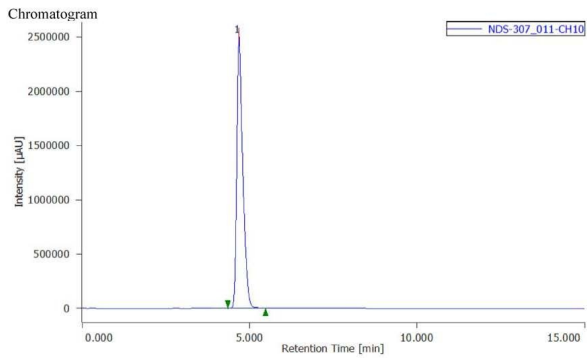

### Chromatogram Information

User Name Administrator  
 Date Modified 9/14/2017 5:24:04 PM  
 Description  
 HPLC System Name Jasco HPLC-4000  
 Injection Date 9/14/2017 1:41:52 PM  
 Volume 20.00 [µL]  
 Sample # 10  
 Project Name DST  
 Acquisition Time 15.0 [min]  
 Acquisition Sequence  
 Control Method 15min6040meohbuffer1.0mlpermin  
 Peak ID Table

### Peak Information

| Peak Name | CH | IR [min] | Area [µVsec] | Height [µV] | Area%   | Height% | NTP  | Resolution | Symmetry Factor |
|-----------|----|----------|--------------|-------------|---------|---------|------|------------|-----------------|
| Unknown   | 10 | 4.683    | 31010393     | 2513326     | 100.000 | 100.000 | 3937 | N/A        | 1.509           |

## HPLC (peak purity) of 7g

Benzimidazolederivatives\_0914 NDS-307\_011 9/22/2017 10:54:11 AM

Institute of Pharmacy, Nirma University

Report - HPLC peak purity

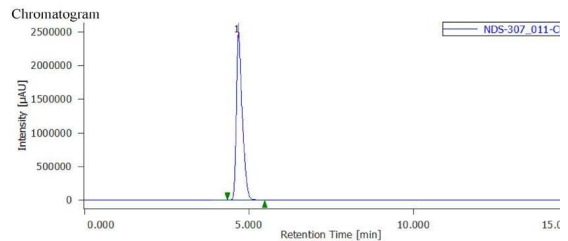

### Peak Purity Info

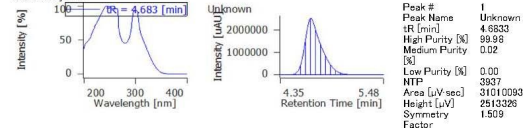

Peak # 1  
 Peak Name Unknown  
 IR [min] 4.6833  
 High Purity [%] 98.99  
 Medium Purity [%] 0.02  
 Low Purity [%] 0.00  
 NTP 3937  
 Area [µVsec] 31010393  
 Height [µV] 2513326  
 Symmetry Factor 1.509

## FTIR spectra of 7h

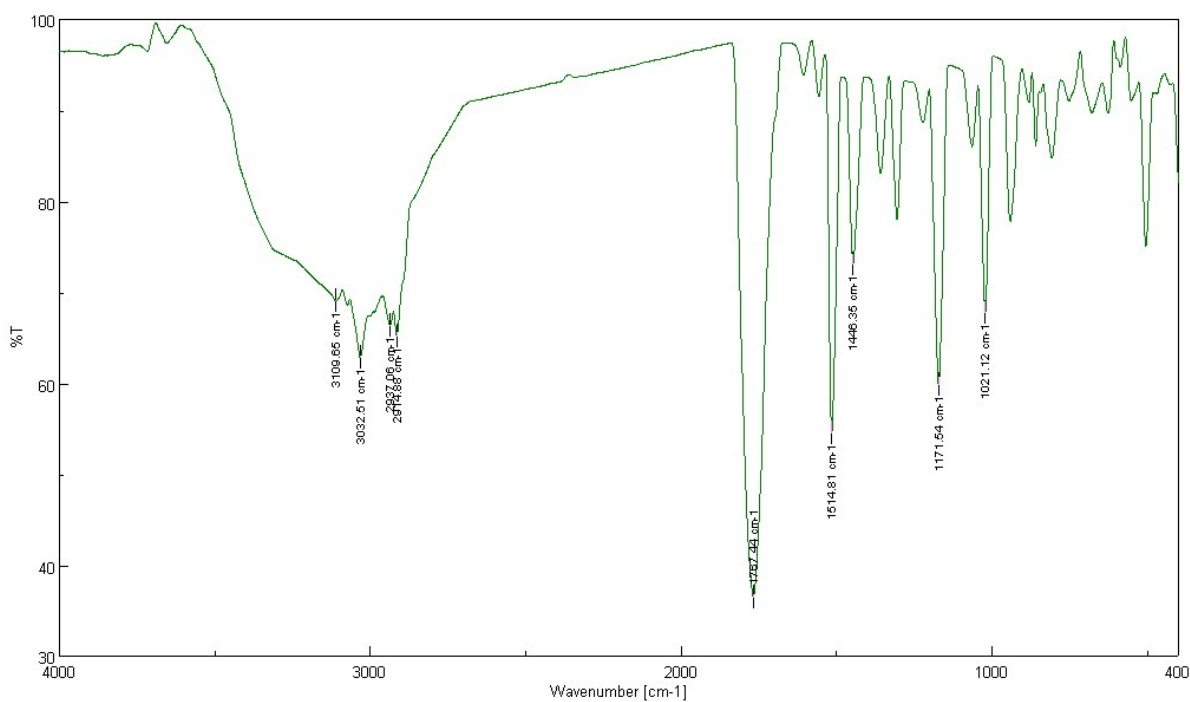

## MASS Analysis of synthesized compound: 7h M+1: 324

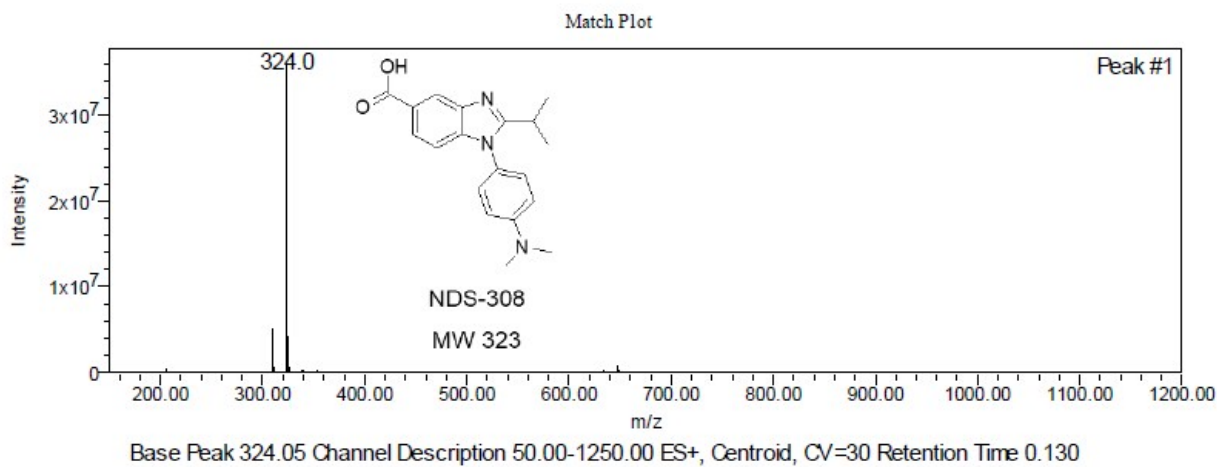

# 1H-NMR Analysis of synthesized compound: 7h

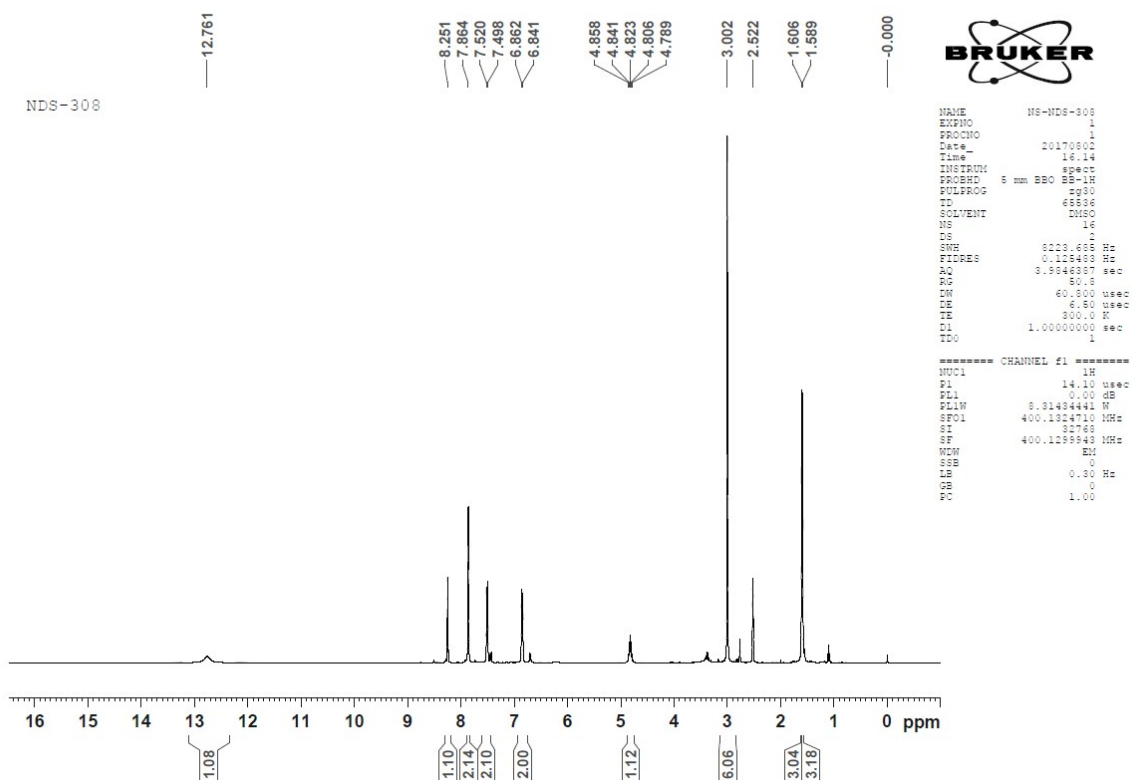

# 1H-NMR-D2O exchange analysis of synthesized compound: 7h

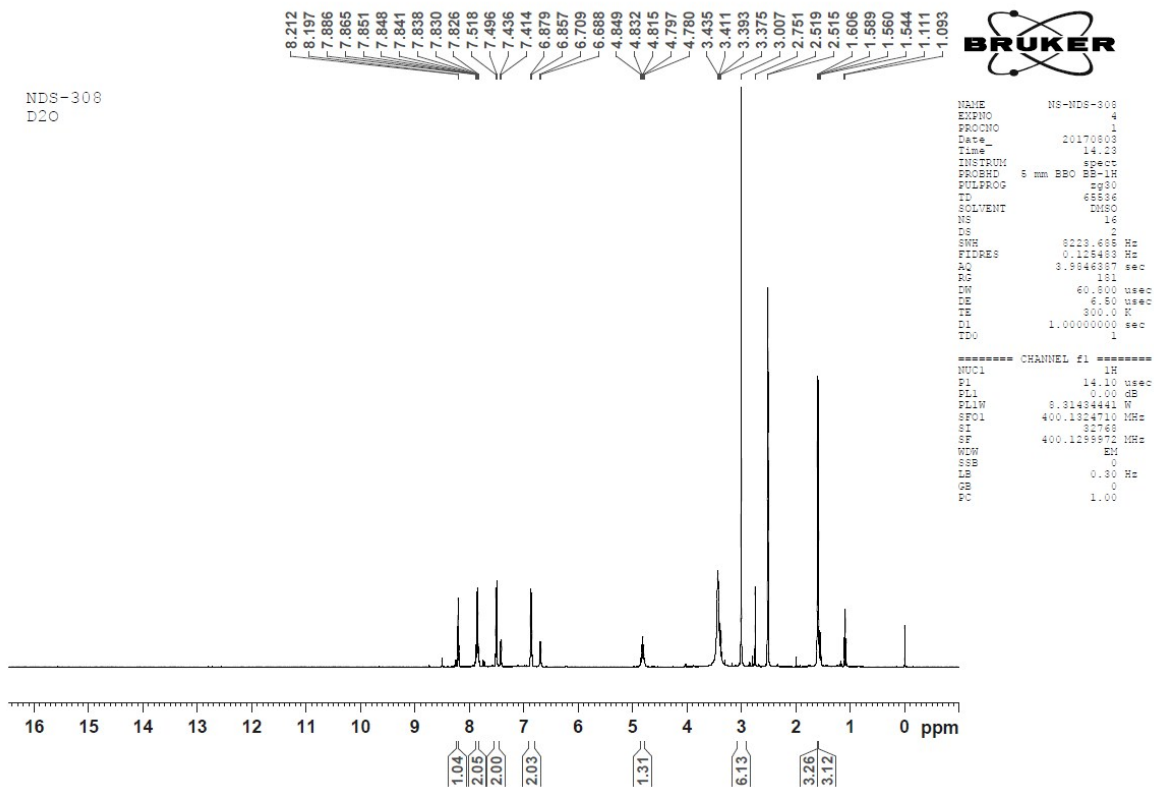

# 13C-NMR Analysis of synthesized compound: 7h

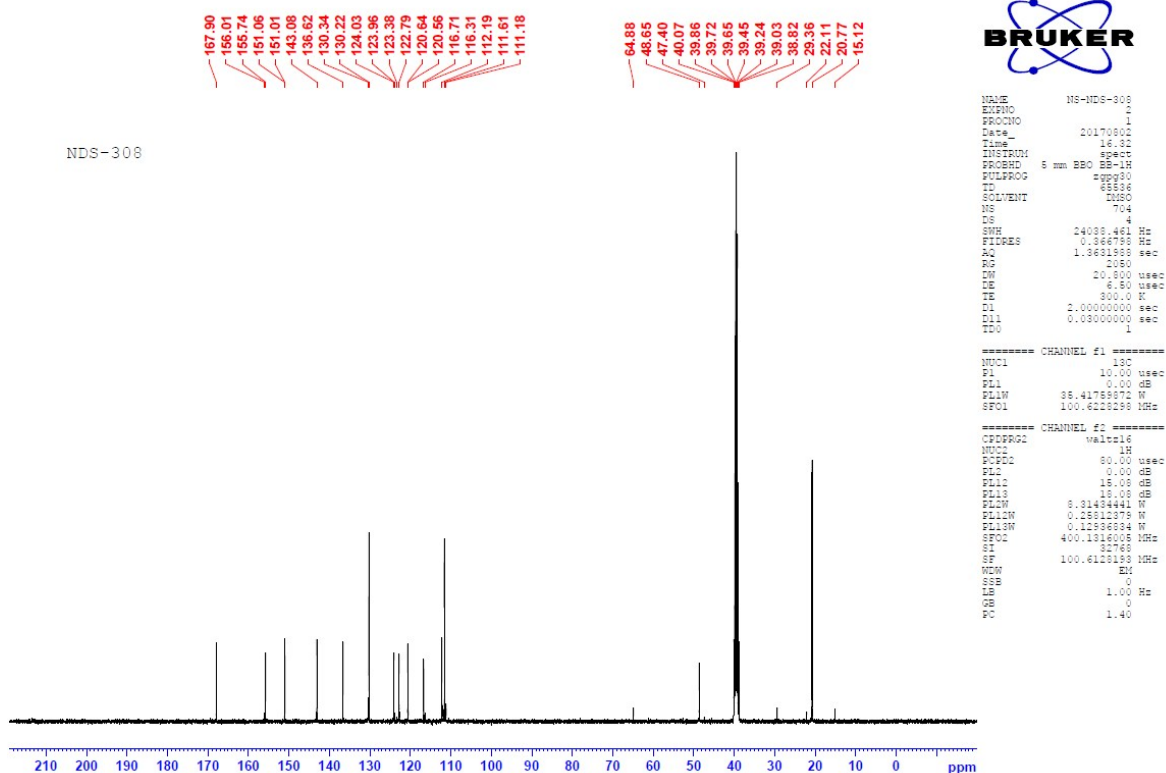

## HPLC (percentage purity) of 7h

Benzimidazole derivatives\_0814 NDS-308\_012 9/16/2017 7:34:39 PM

Institute of Pharmacy, Nirma University

Report - HPLC analysis

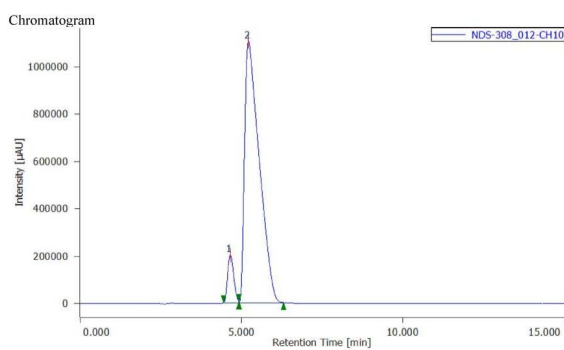

### Chromatogram Information

User Name Administrator  
 Date Modified 9/14/2017 5:24:07 PM  
 Description  
 HPLC System Name Jasco HPLC-4000  
 Injection Date 9/14/2017 1:59:49 PM  
 Volume 20.00 [uL]  
 Sample # 11  
 Project Name DST  
 Acquisition Time 15.0 [min]  
 Acquisition Sequence  
 Control Method 15min6040meohbuffer1.0mlpermin  
 Peak ID Table

### Peak Information

| # | Peak Name | CH | RR [min] | Area [uVsec] | Height [uV] | Area%  | Height% | NTP  | Resolution | Symmetry Factor |
|---|-----------|----|----------|--------------|-------------|--------|---------|------|------------|-----------------|
| 1 | Unknown   | 10 | 4.653    | 2632728      | 202221      | 7.119  | 15.462  | 2679 | 0.930      | 1.228           |
| 2 | Unknown   | 10 | 5.217    | 34739164     | 1103916     | 82.891 | 84.516  | 638  | N/A        | 2.181           |

## HPLC (peak purity) of 7h

Benzimidazole derivatives\_0814 NDS-308\_012 9/22/2017 10:54:27 AM

Institute of Pharmacy, Nirma University

Report - HPLC peak purity

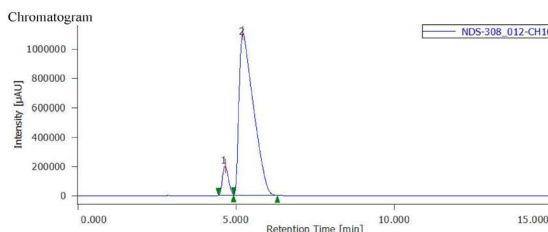

### Peak Purity Info

| Peak # | Peak Name | tr [min] | High Purity [%] | Medium Purity [%] | Low Purity [%] | NTP  | Area [uVsec] | Height [uV] | Symmetry Factor |
|--------|-----------|----------|-----------------|-------------------|----------------|------|--------------|-------------|-----------------|
| 1      | Unknown   | 4.653    | 100.00          | 0.00              | 0.00           | 2679 | 2632728      | 202221      | 1.228           |
| 2      | Unknown   | 5.217    | 100.00          | 0.00              | 0.00           | 638  | 34739164     | 1103916     | 2.181           |



## FTIR spectra of 7i

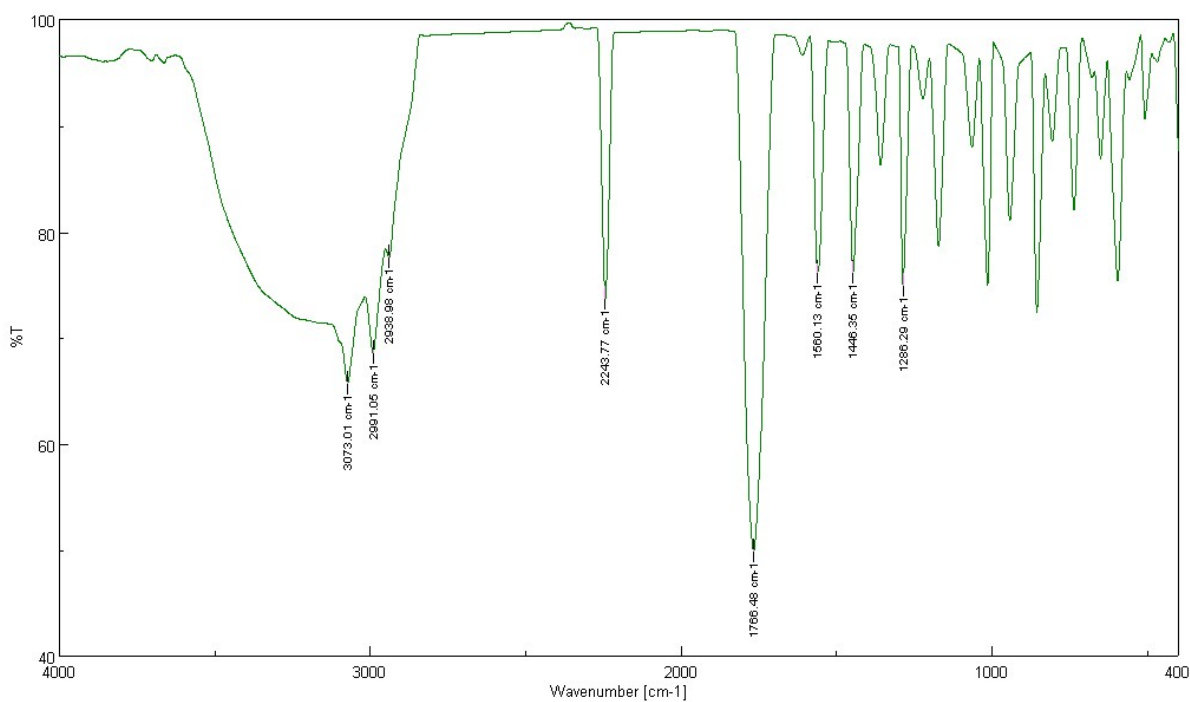

## MASS Analysis of synthesized compound: 7i M+1: 306

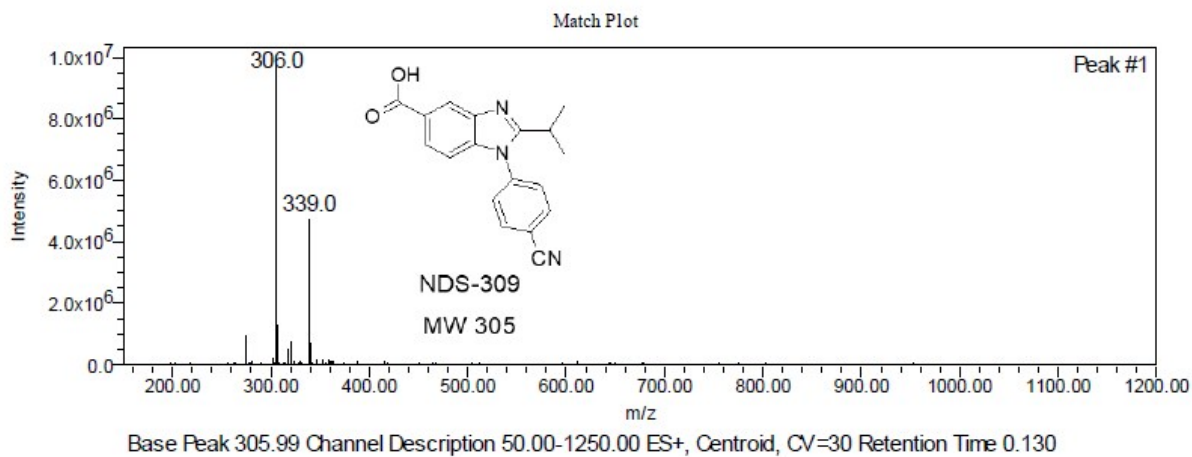

# 1H-NMR Analysis of synthesized compound: 7i

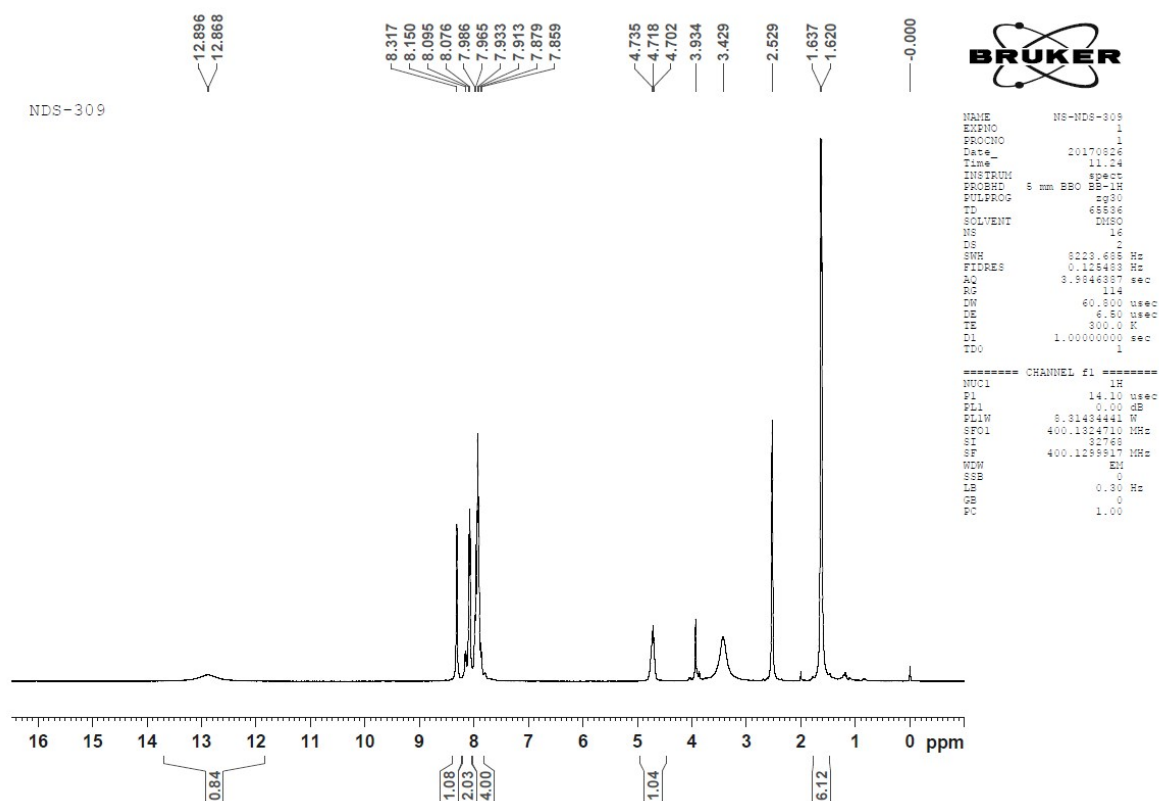

# 1H-NMR-D2O exchange analysis of synthesized compound: 7i

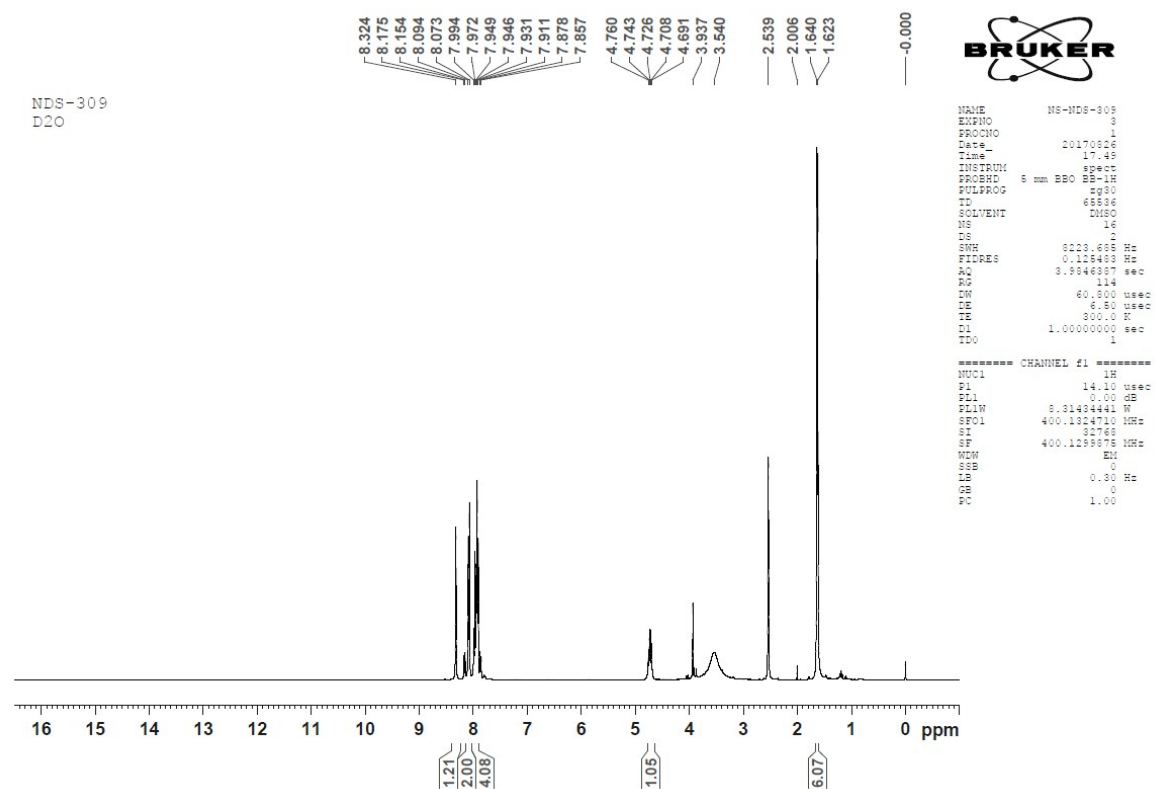

# 13C-NMR Analysis of synthesized compound: 7i

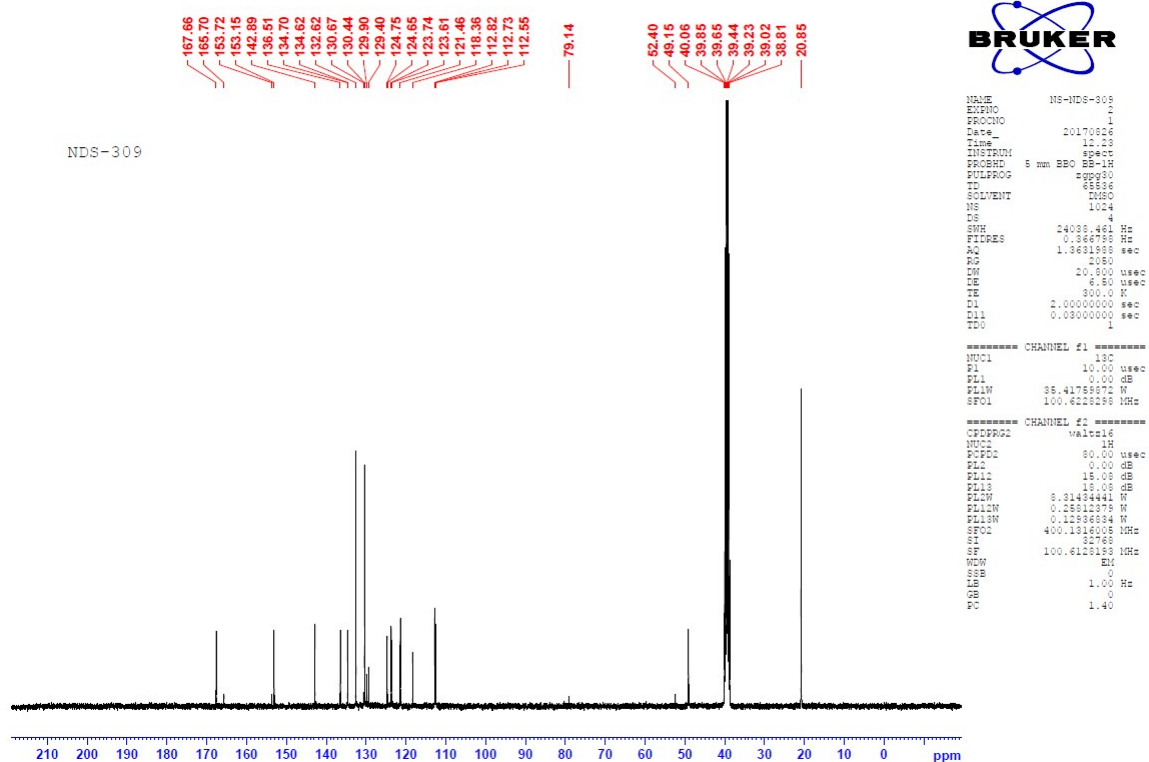

## FTIR spectra of 7j

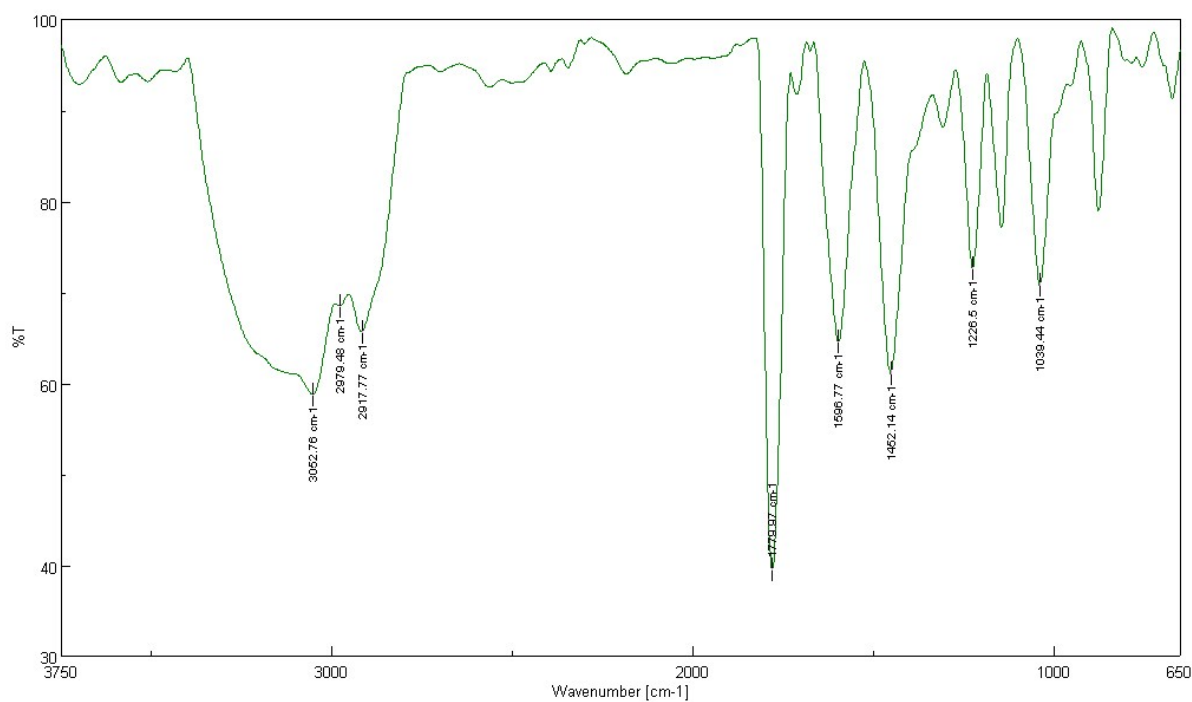

## MASS Analysis of synthesized compound: 7j M+1: 282

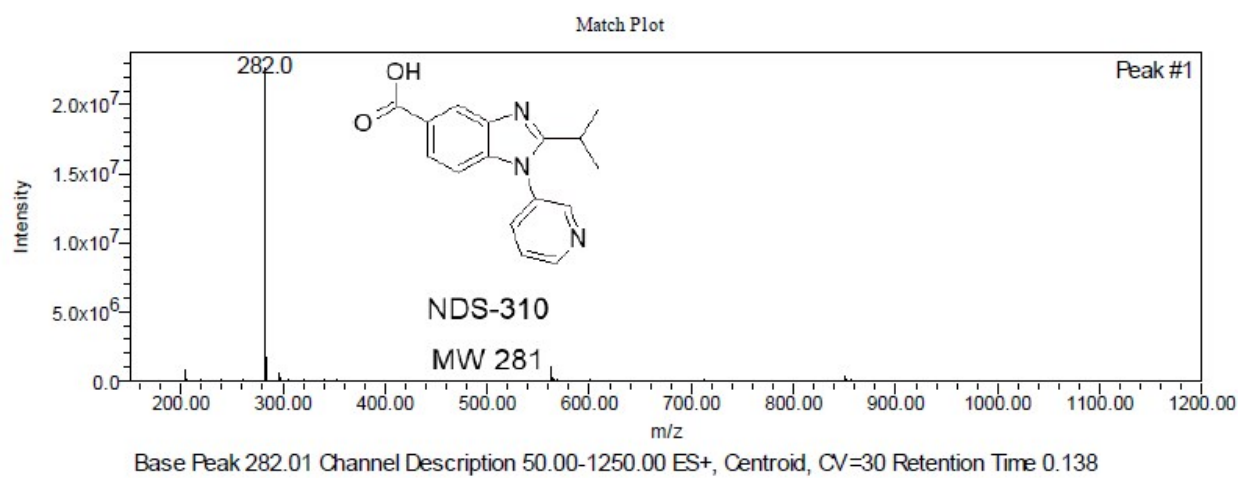



## HPLC (percentage purity) of 7j

Benzimidazole derivatives\_0814 NDS-310\_016 9/16/2017 7:35:39 PM

Institute of Pharmacy, Nirma University

Report - HPLC analysis

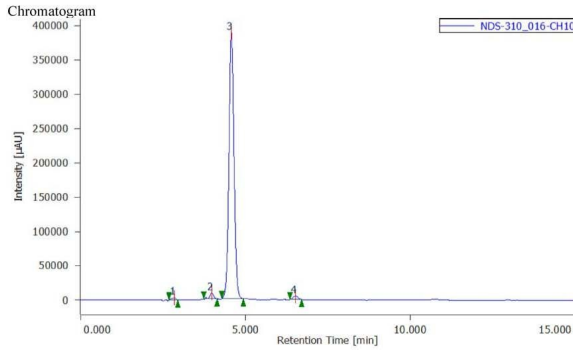

### Chromatogram Information

User Name Administrator  
 Date Modified 9/14/2017 5:24:12 PM  
 Description  
 HPLC System Name Jasco HPLC-4000  
 Injection Date 9/14/2017 3:43:19 PM  
 Volume 20.00 [µL]  
 Sample # 15  
 Project Name DST  
 Acquisition Time 15.0 [min]  
 Acquisition Sequence  
 Control Method 15min6040meohbuffer1.0mlpermin  
 Peak ID Table

### Peak Information

| Peak Name | CH      | RT [min] | Area [µVsec] | Height [µV] | Area%  | Height% | NTP  | Resolution | Symmetry Factor |
|-----------|---------|----------|--------------|-------------|--------|---------|------|------------|-----------------|
| 1         | Unknown | 2.840    | 30352        | 3825        | 0.706  | 0.895   | 3385 | 4.943      | 0.791           |
| 2         | Unknown | 3.973    | 71482        | 8567        | 1.882  | 2.116   | 8579 | 2.532      | 0.796           |
| 3         | Unknown | 4.570    | 4144871      | 387882      | 98.392 | 95.801  | 4396 | 6.827      | 1.058           |
| 4         | Unknown | 6.510    | 53299        | 4807        | 1.238  | 1.187   | 6967 | N/A        | 1.058           |

## HPLC (peak purity) of 7j

Benzimidazole derivatives\_0814 NDS-310\_016 9/22/2017 10:55:00 AM

Institute of Pharmacy, Nirma University

Report - HPLC peak purity

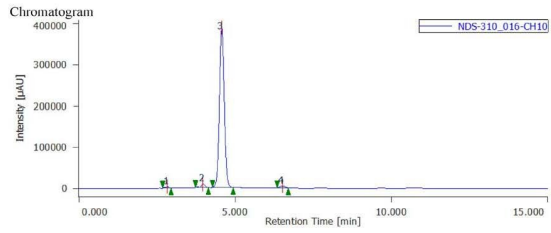

### Peak Purity Info

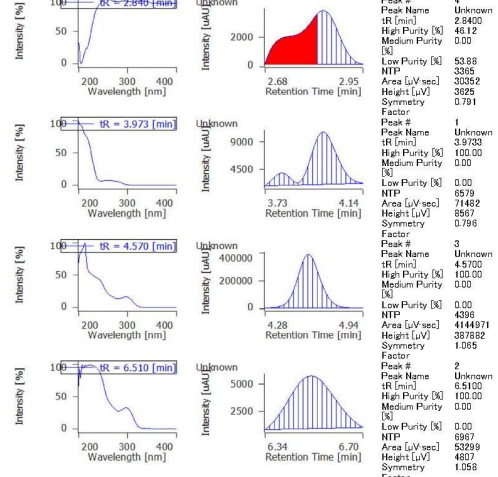

## FTIR spectra of 7k

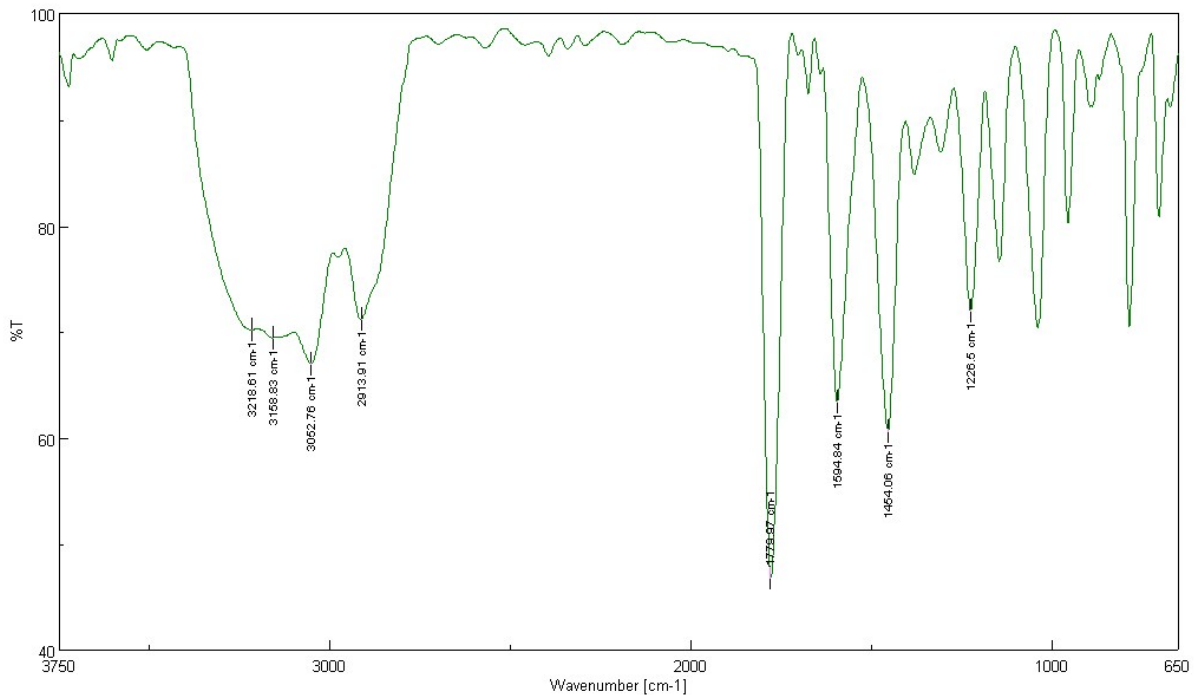

## MASS Analysis of synthesized compound: 7k M+1: 282

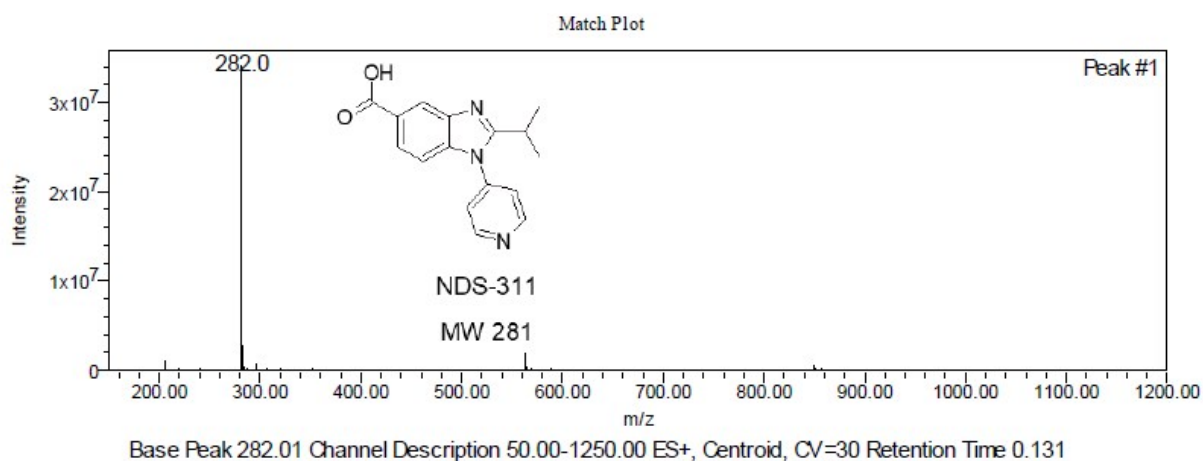

## <sup>1</sup>H-NMR Analysis of synthesized compound: 7k

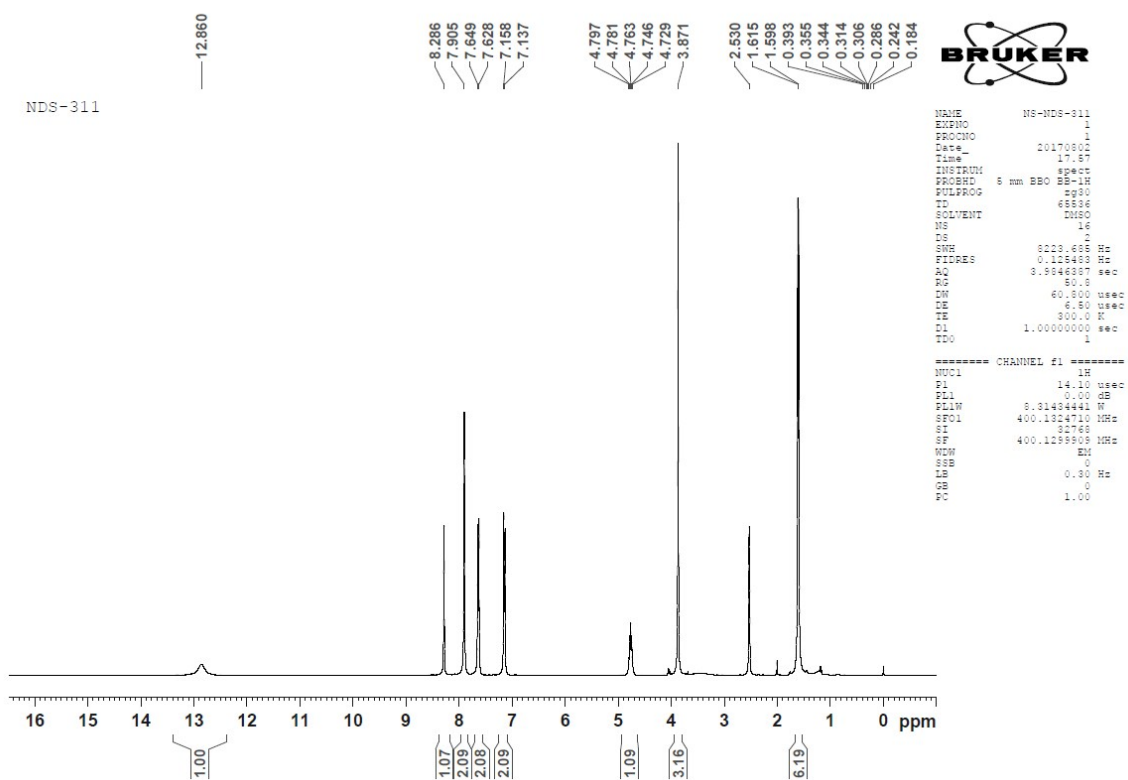

# 1H-NMR-D2O exchange analysis of synthesized compound: 7k

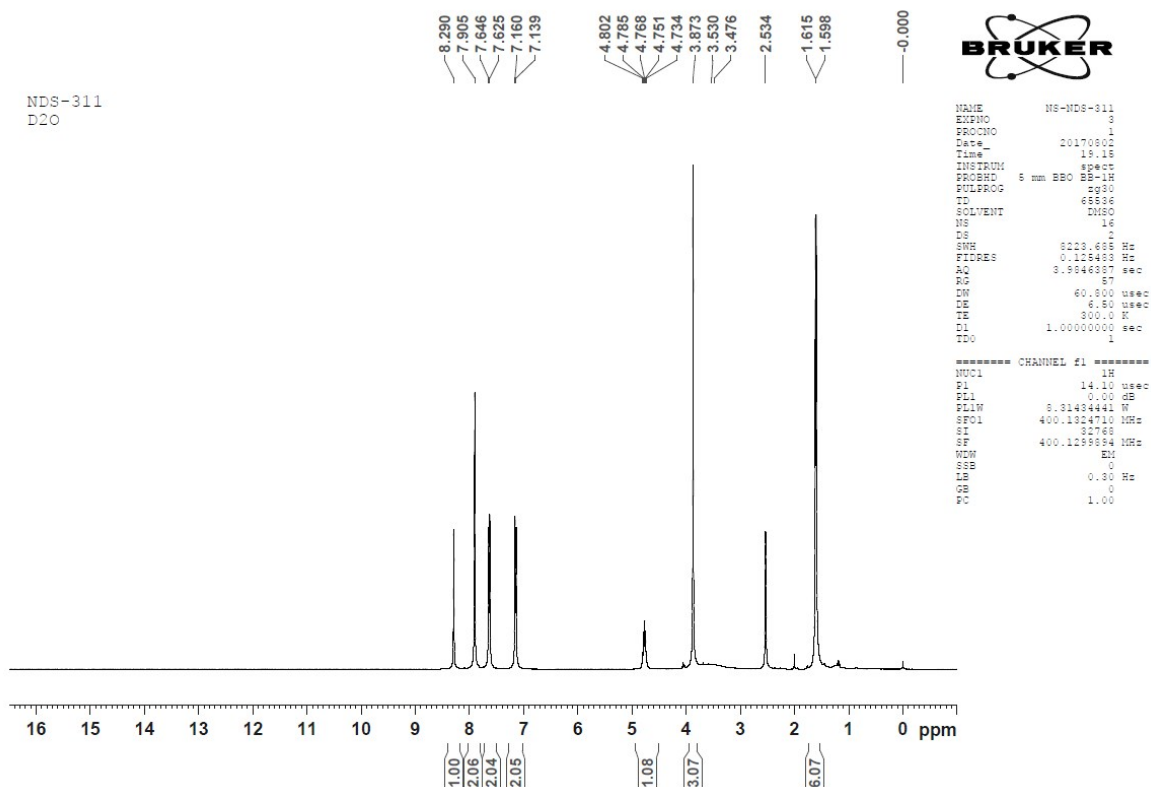

# 13C-NMR Analysis of synthesized compound: 7k

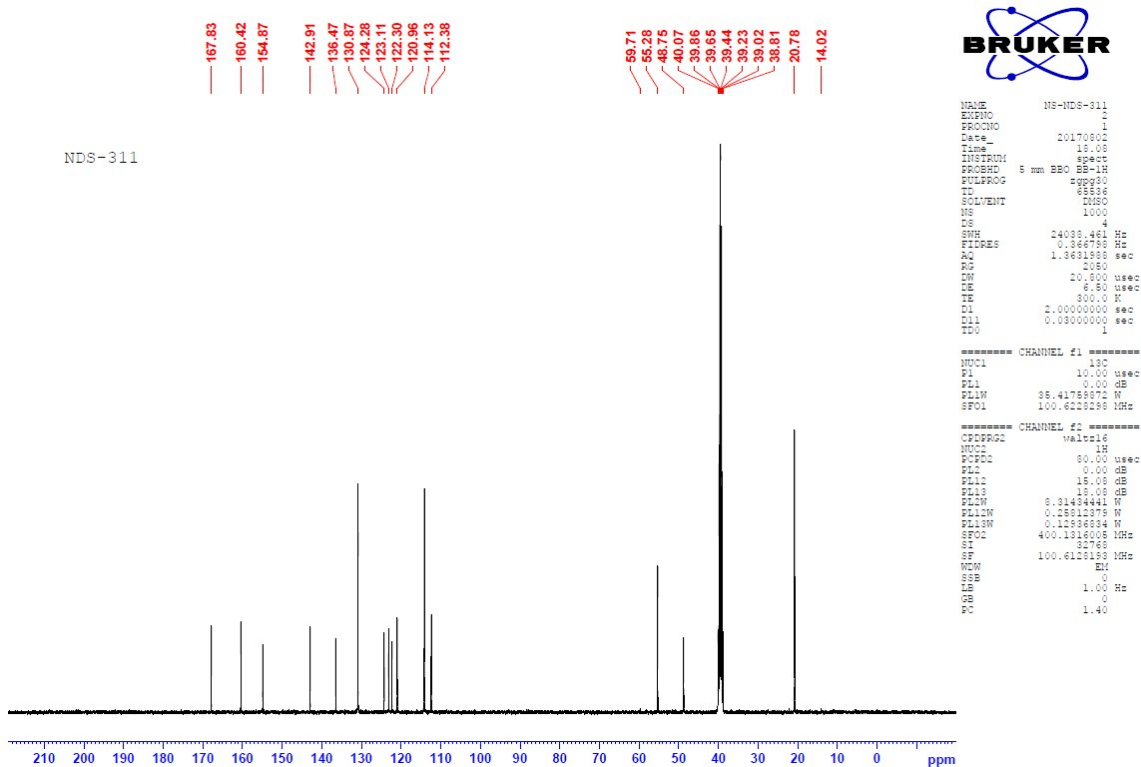



## HPLC (percentage purity) of 7k

Benzimidazole derivative\_0914 NDS-311\_018 9/16/2017 7:35:57 PM

Institute of Pharmacy, Nirma University

Report - HPLC analysis

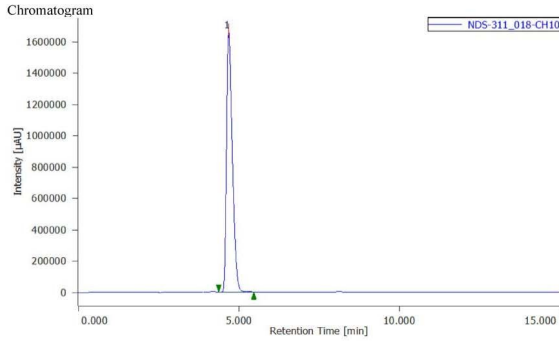

### Chromatogram Information

User Name Administrator  
 Date Modified 9/14/2017 5:24:15 PM  
 Description  
 HPLC System Name Jasco HPLC-4000  
 Injection Date 9/14/2017 4:23:55 PM  
 Volume 20.00 [µL]  
 Sample # 17  
 Project Name DST  
 Acquisition Time 15.0 [min]  
 Acquisition Sequence  
 Control Method 15min6040meohbuffer1.0mlpemin  
 Peak ID Table

### Peak Information

| Peak Name | CH | RT [min] | Area [µV·sec] | Height [µV] | Area%   | Height% | NTP  | Resolution | Symmetry Factor |
|-----------|----|----------|---------------|-------------|---------|---------|------|------------|-----------------|
| Unknown   | 10 | 4.680    | 20883308      | 1886793     | 100.000 | 100.000 | 3398 | N/A        | 1.512           |

## HPLC (peak purity) of 7k

Benzimidazole derivative\_0914 NDS-311\_018 9/22/2017 10:55:15 AM

Institute of Pharmacy, Nirma University

Report - HPLC peak purity

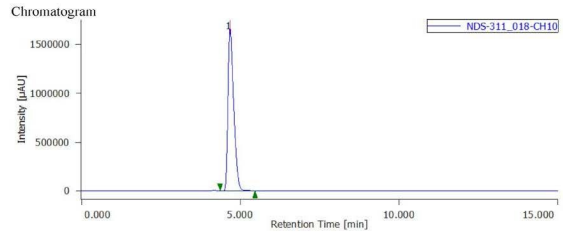

### Peak Purity Info

Intensity [%]  
 Wavelength [nm]  
 Peak # 1  
 Peak Name Unknown  
 RT [min] 4.6800  
 High Purity [%] 99.96  
 Medium Purity [%] 0.01  
 Low Purity [%] 0.03  
 NTP 3398  
 Area [µV·sec] 20883308  
 Height [µV] 1886793  
 Symmetry Factor 1.512

## FTIR spectra of 7l

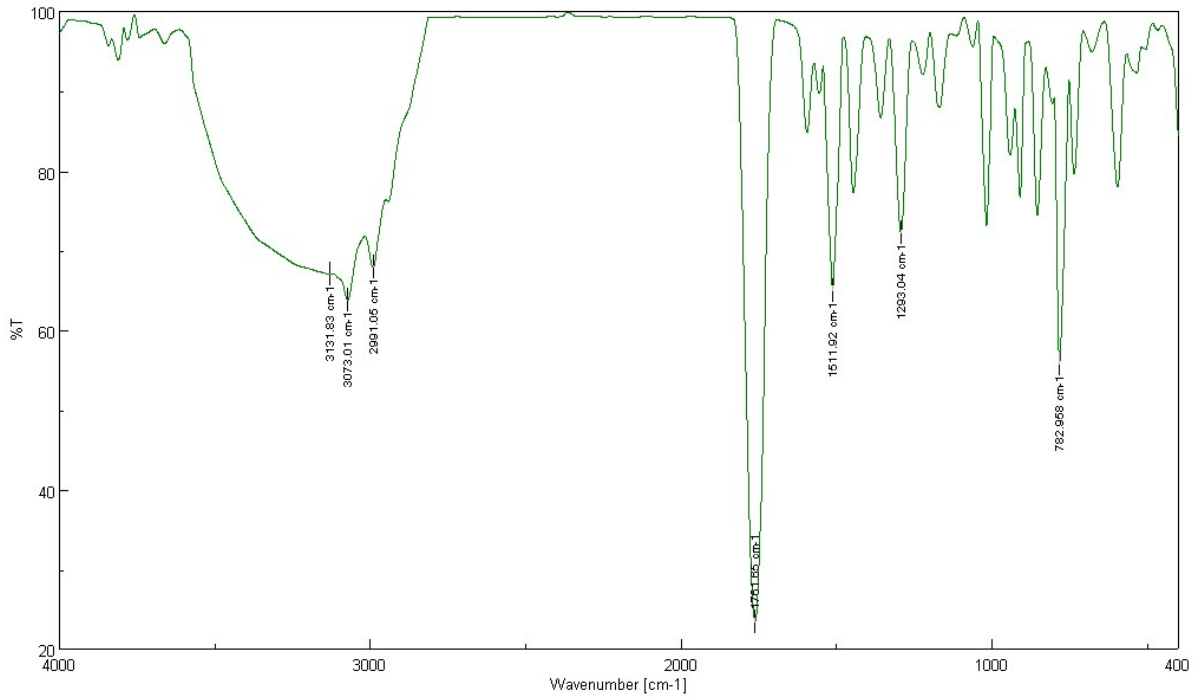

## MASS Analysis of synthesized compound: 7l M+1: 315, M+3: 317

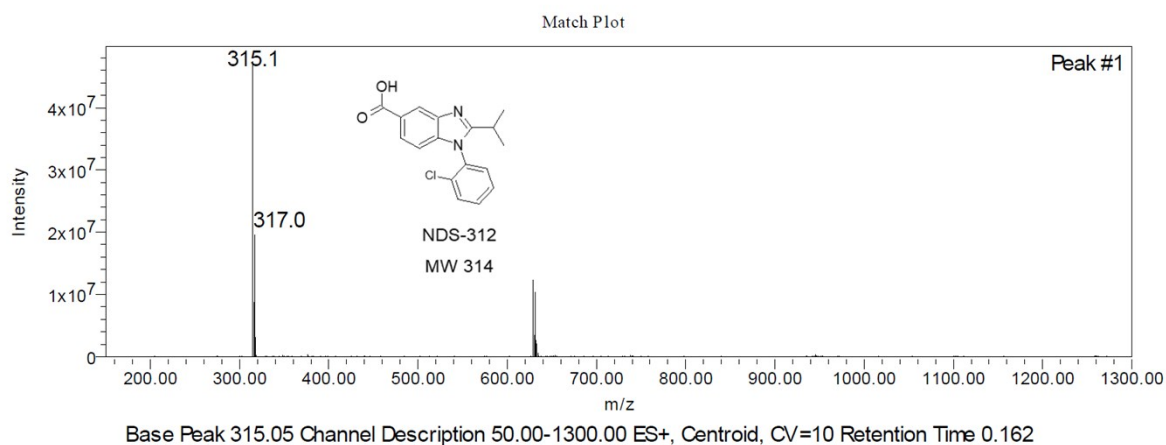

## <sup>1</sup>H-NMR Analysis of synthesized compound: 7l

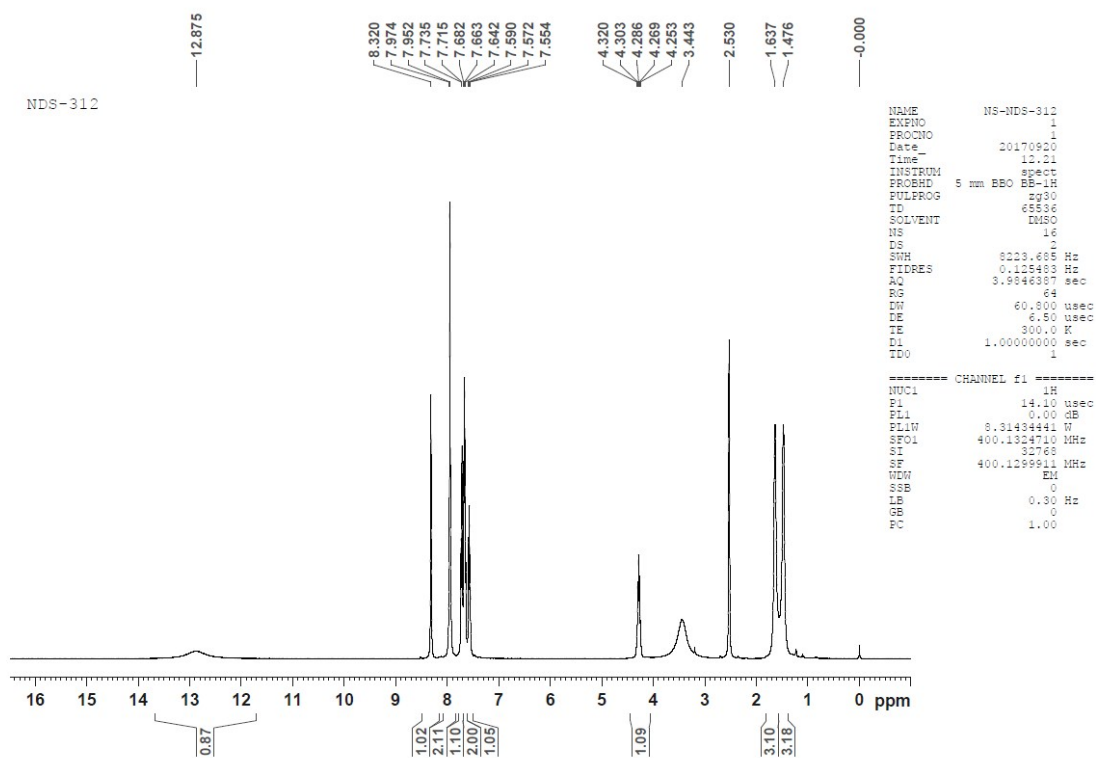

# 1H-NMR-D2O exchange analysis of synthesized compound: 7l

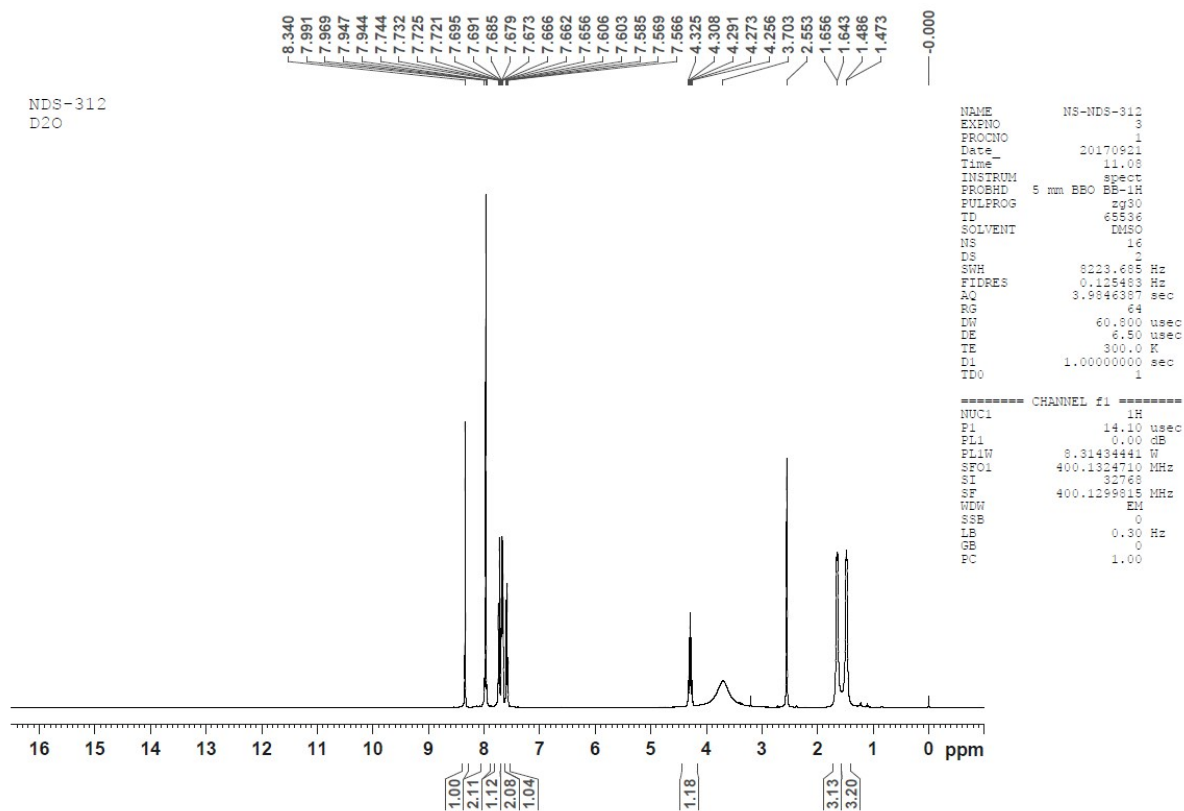

# 13C-NMR Analysis of synthesized compound: 7l

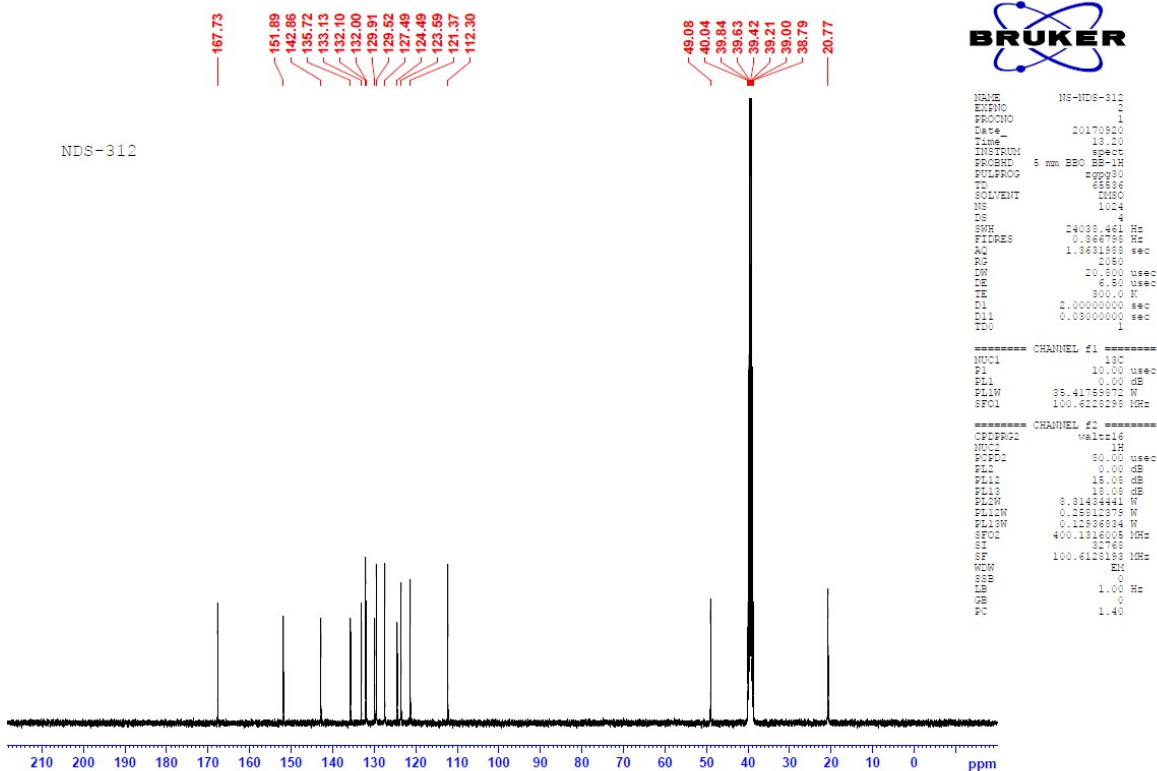

## HPLC (percentage purity) of 7l

Benzimidazolederivatives\_0914 NDS-312\_019 9/16/2017 7:38:14 PM

Institute of Pharmacy, Nirma University

Report - HPLC analysis

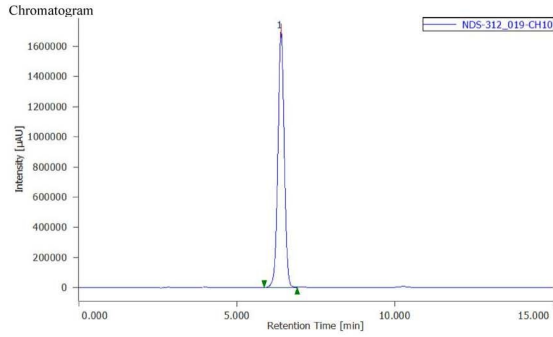

### Chromatogram Information

User Name Administrator  
 Date Modified 9/14/2017 5:24:17 PM  
 Description  
 HPLC System Name Jasco HPLC-4000  
 Injection Date 9/14/2017 4:41:05 PM  
 Volume 20.00 [μL]  
 Sample # 18  
 Project Name DST  
 Acquisition Time 15.0 [min]  
 Acquisition Sequence  
 Control Method 15min6040meohbuffer1.0mlpermin  
 Peak ID Table

### Peak Information

| Peak Name | CH | RR [min] | Area [μVsec] | Height [μV] | Area%   | Height% | NTP  | Resolution | Symmetry Factor |
|-----------|----|----------|--------------|-------------|---------|---------|------|------------|-----------------|
| 1 Unknown | 10 | 6.397    | 23582464     | 1701982     | 100.000 | 100.000 | 5250 | N/A        | 0.994           |

## HPLC (peak purity) of 7l

Benzimidazolederivatives\_0914 NDS-312\_019 9/22/2017 10:55:51 AM

Institute of Pharmacy, Nirma University

Report - HPLC peak purity

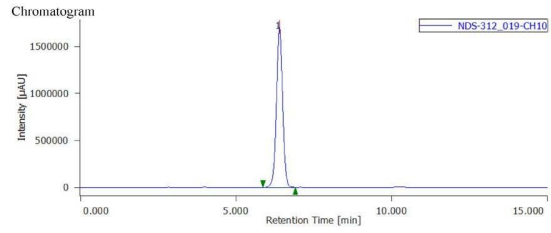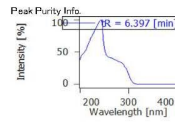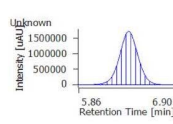

Peak # 1  
 Peak Name Unknown  
 RR [min] 6.397  
 High Purity [0] 100.00  
 Medium Purity [0] 0.00  
 Low Purity [0] 0.00  
 NTP 5250  
 Area [μVsec] 23582464  
 Height [μV] 1701982  
 Symmetry Factor 0.994

## FTIR spectra of 7m

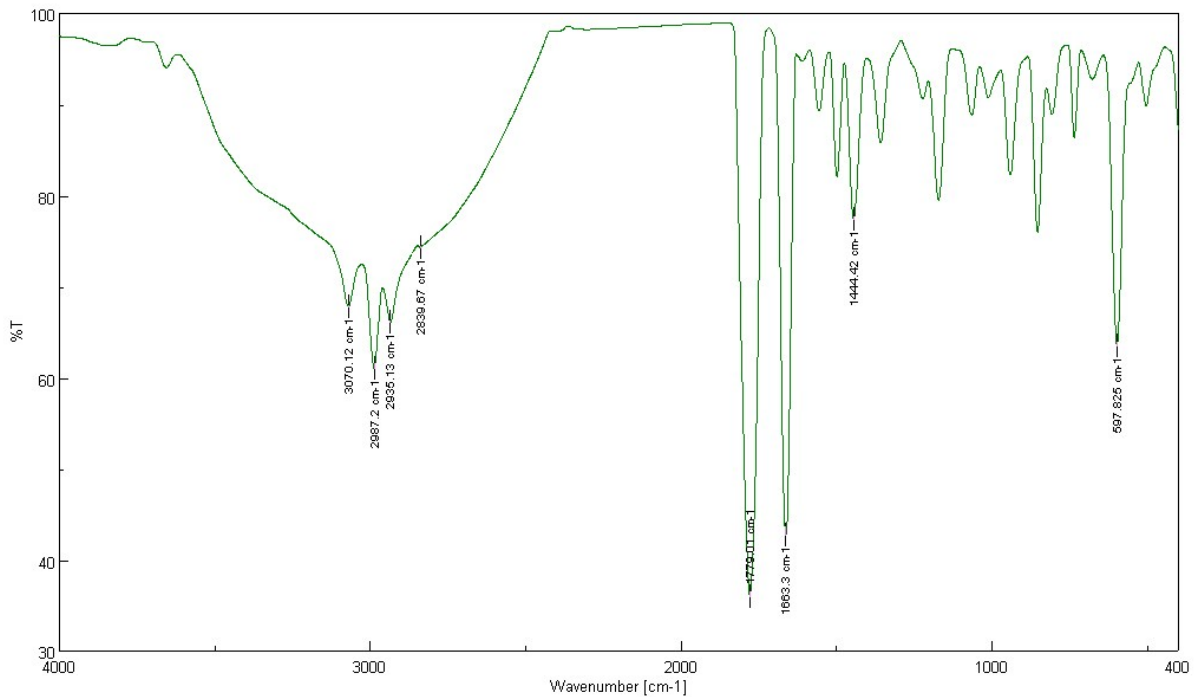

## MASS Analysis of synthesized compound: 7m M+1: 424

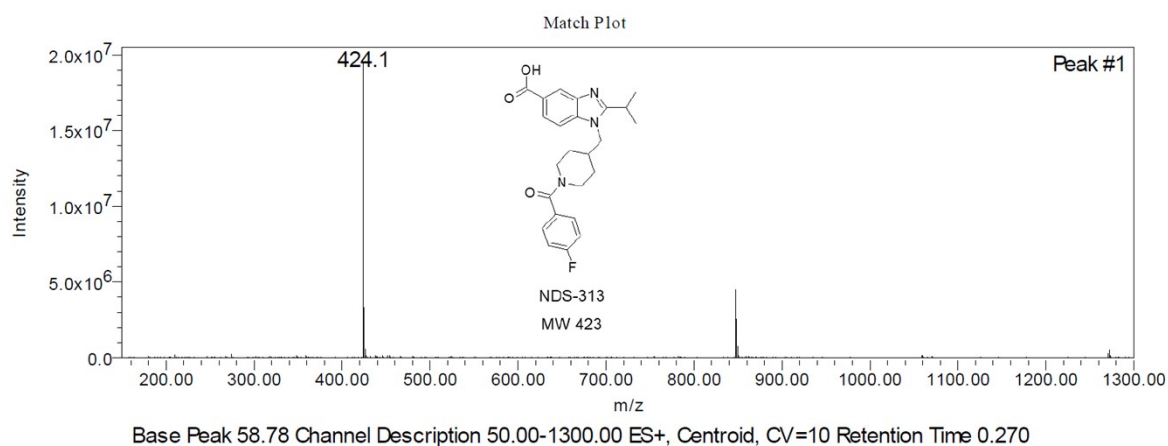

## <sup>1</sup>H-NMR Analysis of synthesized compound: 7m

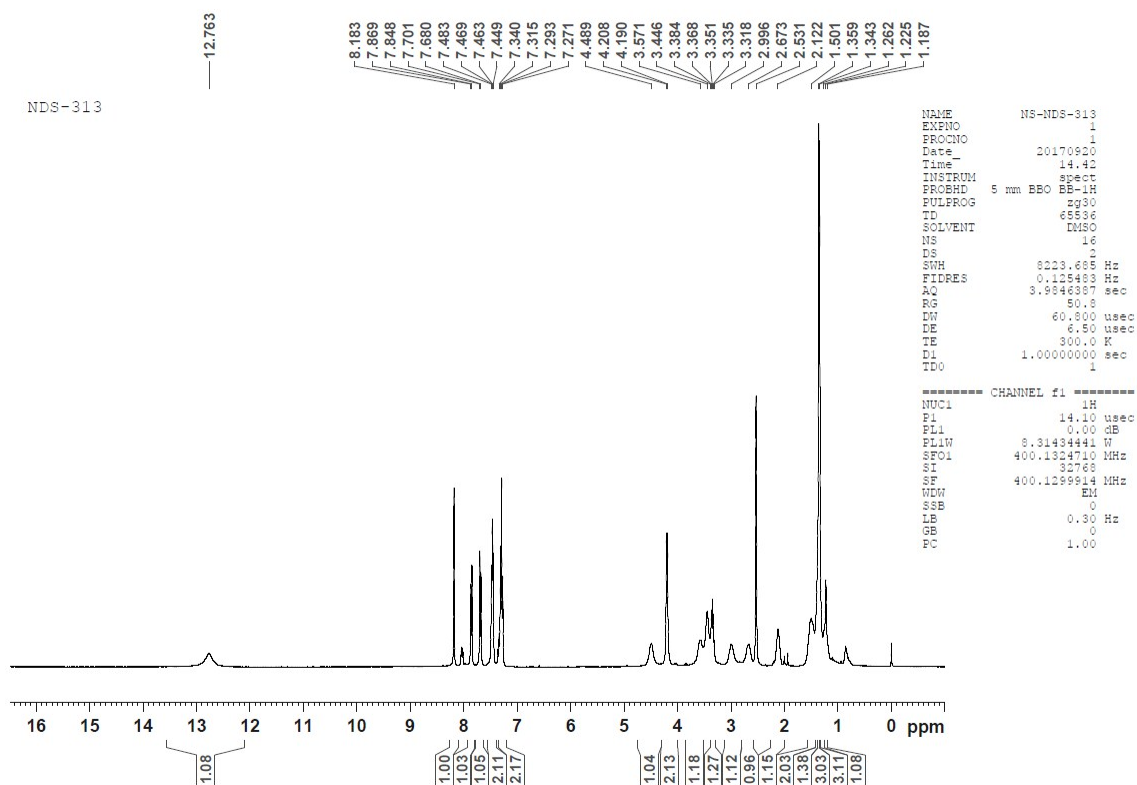

# 1H-NMR-D2O exchange analysis of synthesized compound: 7m

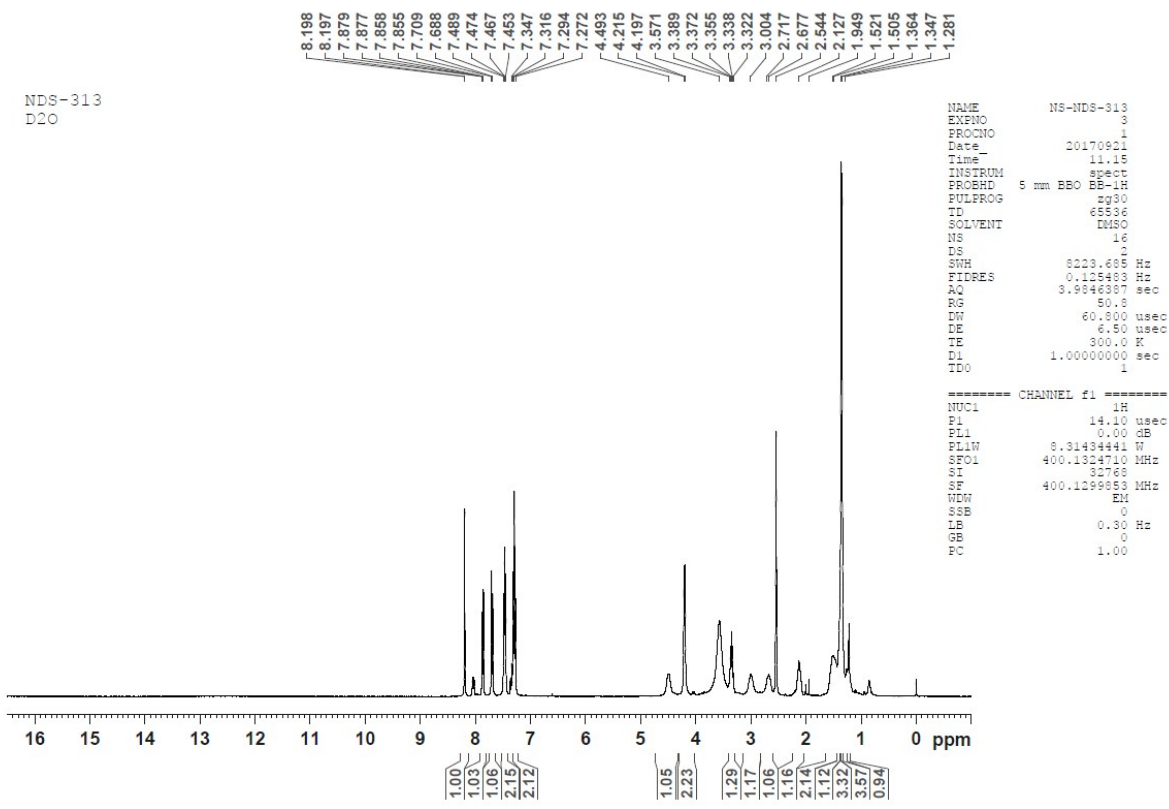

# 13C-NMR Analysis of synthesized compound: 7m

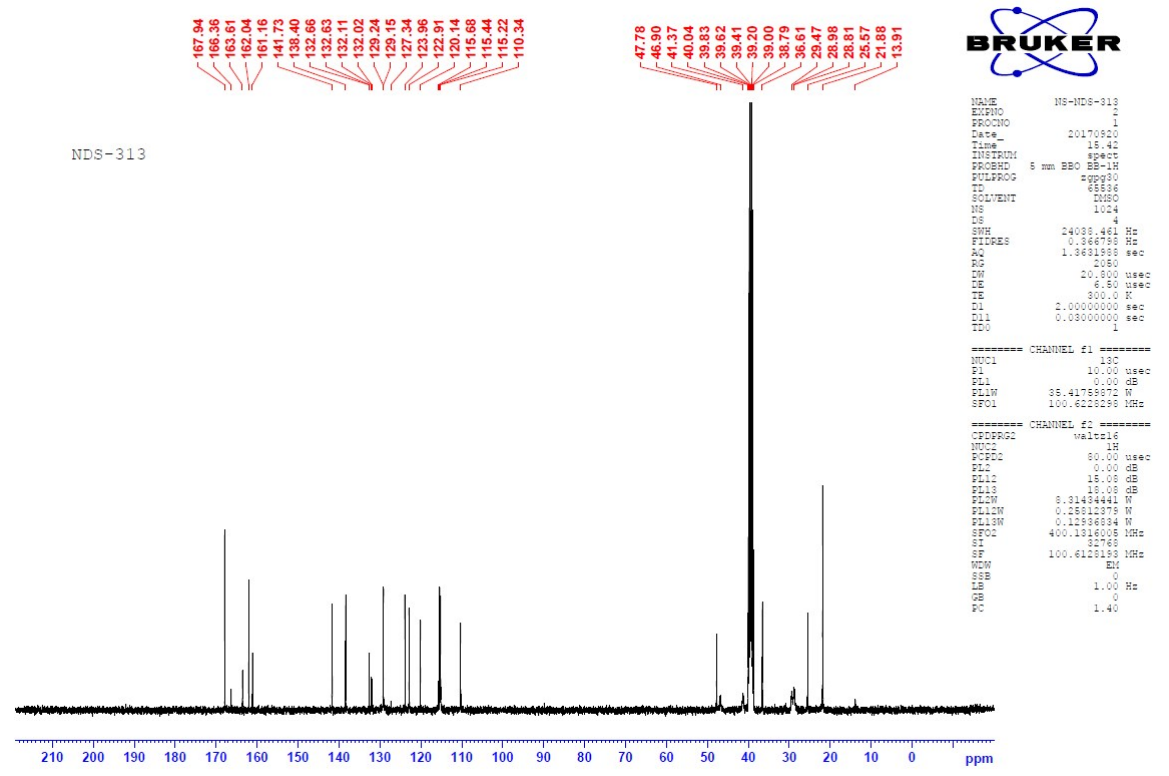

## HPLC (percentage purity) of 7m

Benzimidazole derivatives\_0914 NDS-313\_021 9/16/2017 7:38:37 PM

Institute of Pharmacy, Nirma University

Report - HPLC analysis

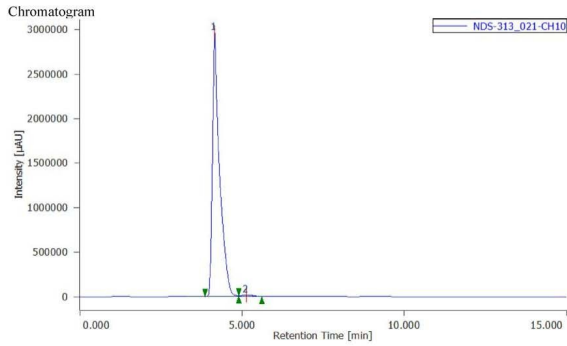

### Chromatogram Information

User Name Administrator  
 Date Modified 9/14/2017 5:32:08 PM  
 Description  
 HPLC System Name Jasco HPLC-4000  
 Injection Date 9/14/2017 5:10:28 PM  
 Volume 20.00 [µL]  
 Sample # 20  
 Project Name DST  
 Acquisition Time 15.0 [min]  
 Acquisition Sequence  
 Control Method 15min6040meohbuffer1.0mlpemin  
 Peak ID Table

### Peak Information

| Peak Name | RT [min] | Area [µVsec] | Height [µV] | Area%  | Height% | NTP  | Resolution | Symmetry Factor |
|-----------|----------|--------------|-------------|--------|---------|------|------------|-----------------|
| 1 Unknown | 4.160    | 44711344     | 2968155     | 99.139 | 99.488  | 2754 | N/A        | 1.893           |
| 2 Unknown | 15.143   | 388208       | 15324       | 0.861  | 0.514   | 599  | N/A        | N/A             |

## HPLC (peak purity) of 7m

Benzimidazole derivatives\_0914 NDS-313\_021 9/22/2017 10:58:12 AM

Institute of Pharmacy, Nirma University

Report - HPLC peak purity

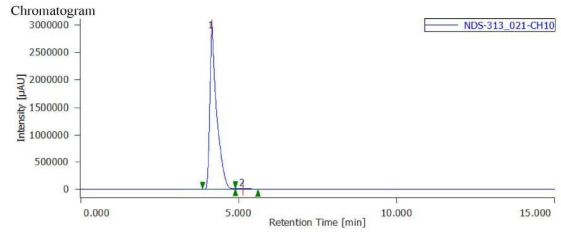

### Peak Purity Info

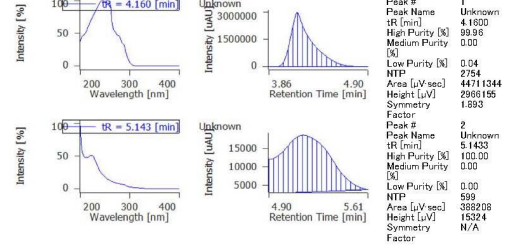

| Peak # | Peak Name | RT [min] | High Purity [%] | Medium Purity [%] | Low Purity [%] | NTP  | Area [µVsec] | Height [µV] | Symmetry Factor |
|--------|-----------|----------|-----------------|-------------------|----------------|------|--------------|-------------|-----------------|
| 1      | Unknown   | 4.1600   | 99.96           | 0.00              | 0.04           | 2754 | 44711344     | 2968155     | 1.893           |
| 2      | Unknown   | 5.1433   | 100.00          | 0.00              | 0.00           | 599  | 388208       | 15324       | N/A             |

## FTIR spectra of 7n

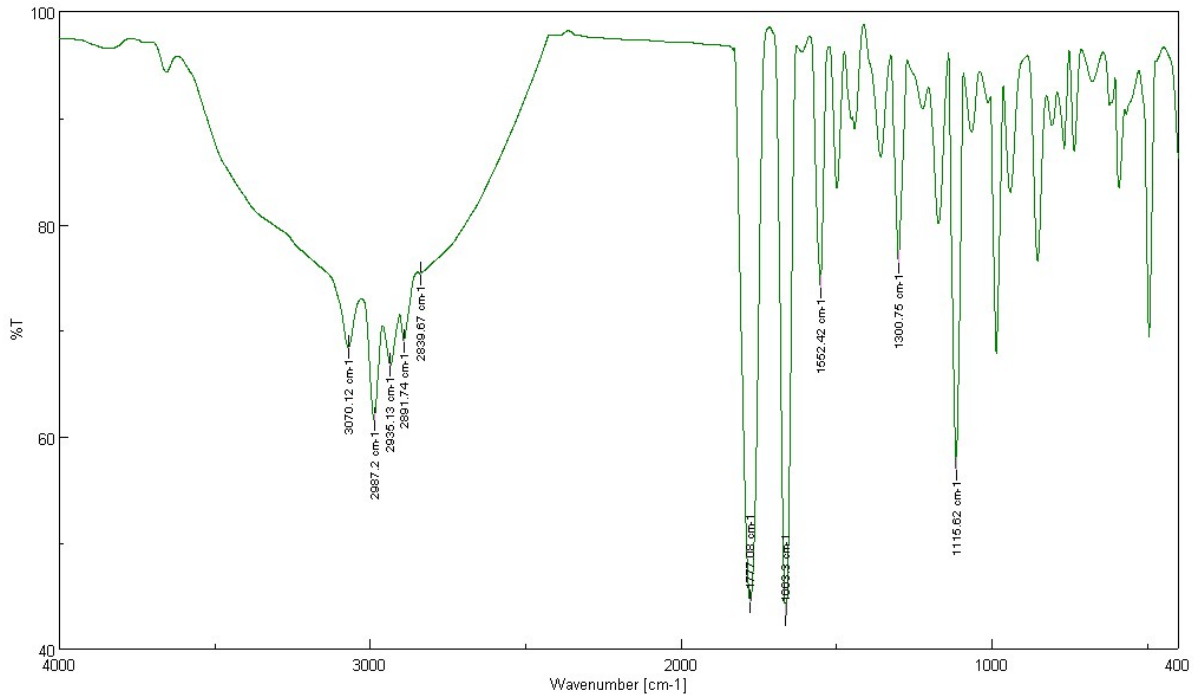

## MASS Analysis of synthesized compound: 7n M+1: 436

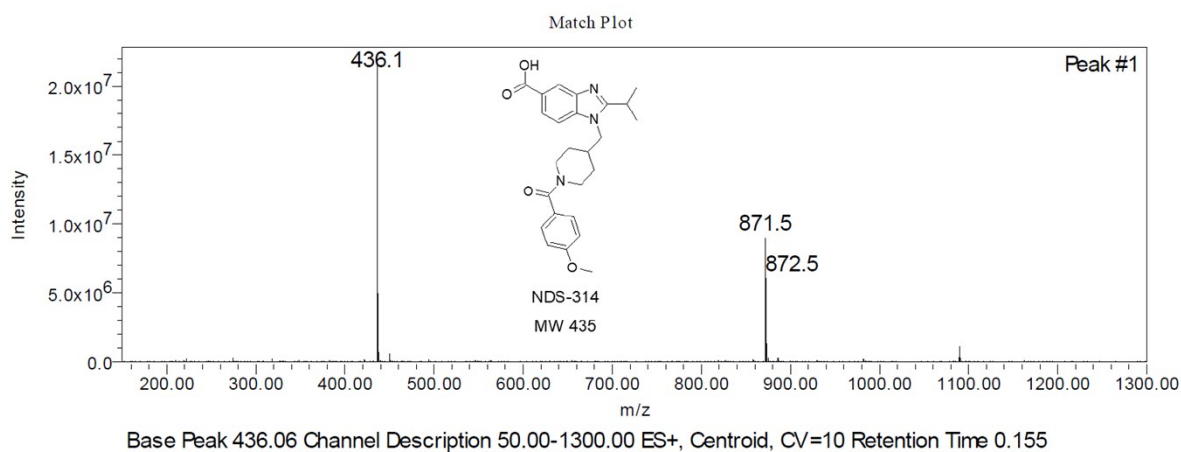

## <sup>1</sup>H-NMR Analysis of synthesized compound: 7n

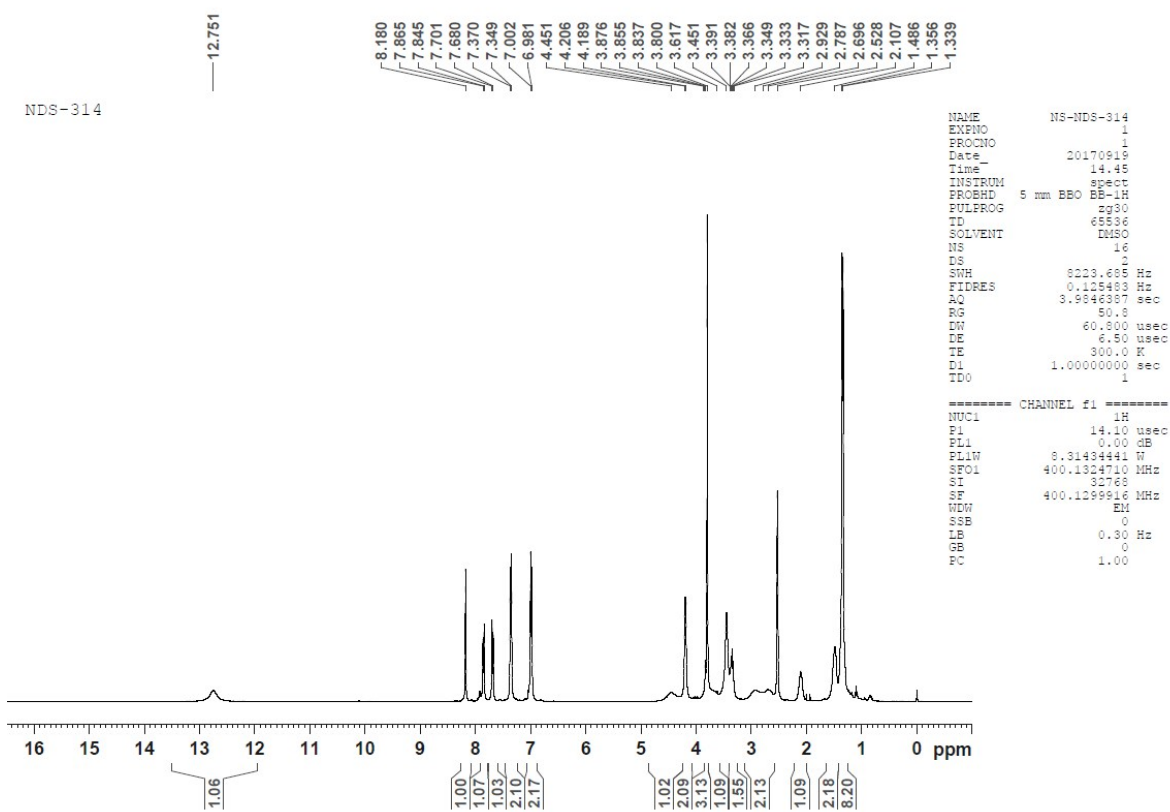



# 1H-NMR-D2O exchange analysis of synthesized compound: 7n

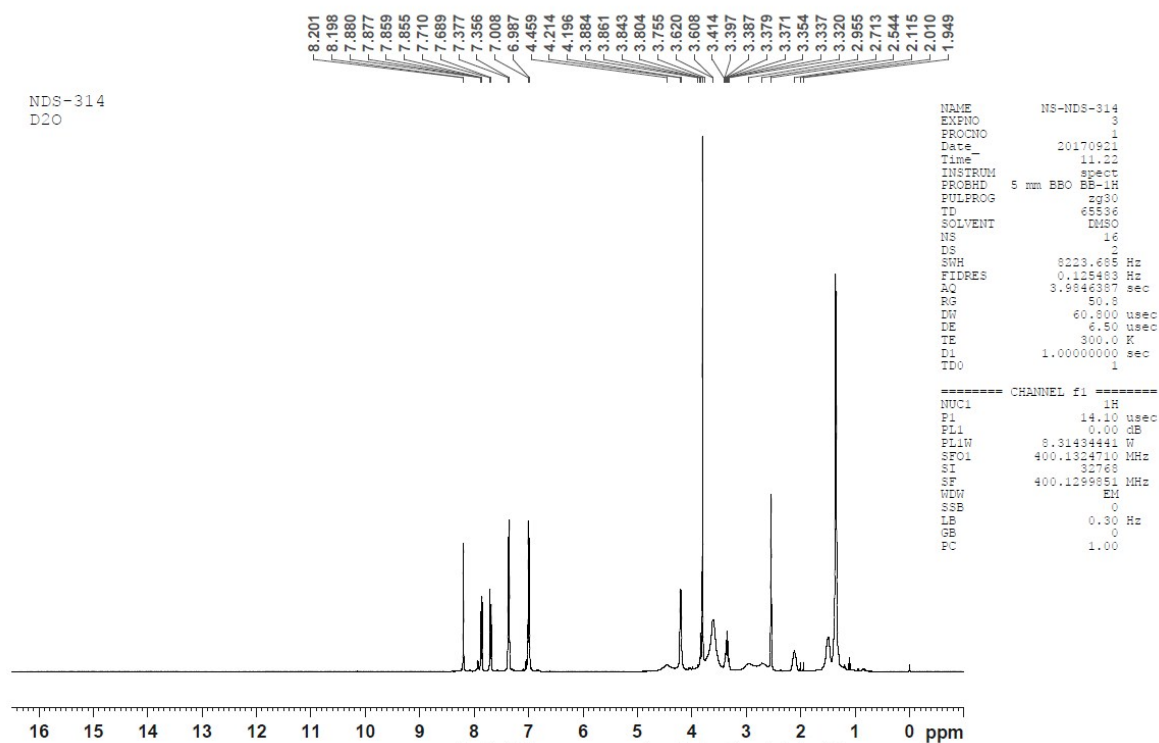

# 13C-NMR Analysis of synthesized compound: 7n

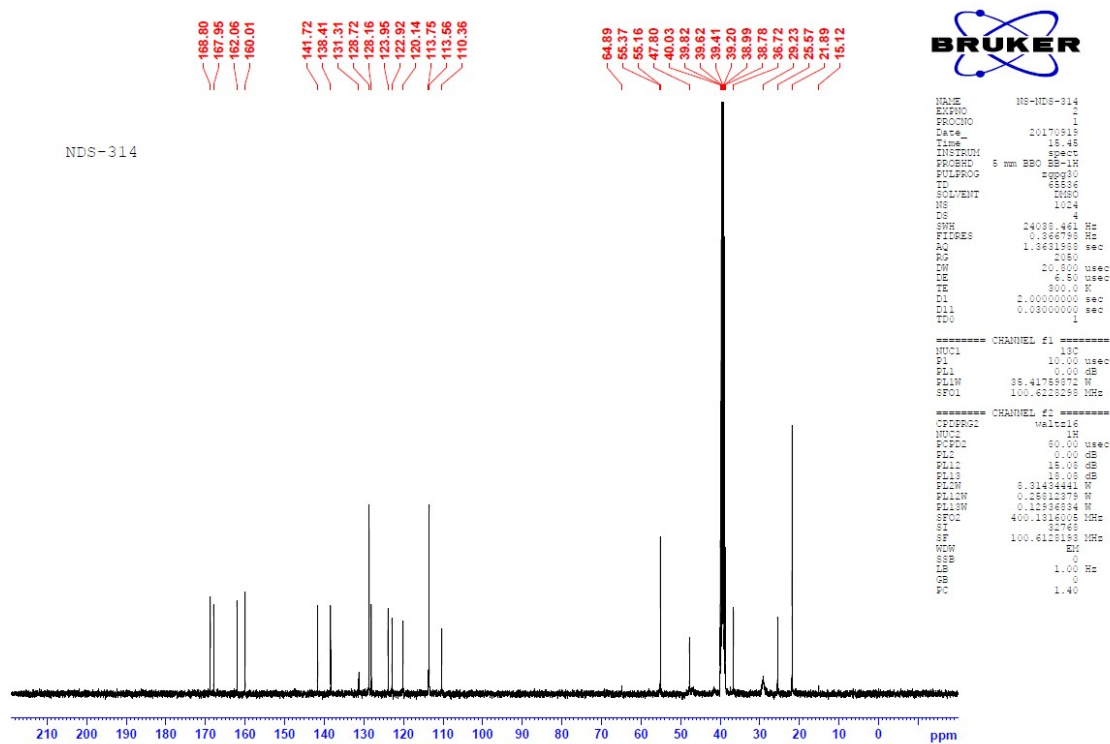

## HPLC (percentage purity) of 7n

Benzimidazole derivatives\_0914 NDS-314\_023 9/16/2017 7:36:55 PM

Institute of Pharmacy, Nirma University

Report - HPLC analysis

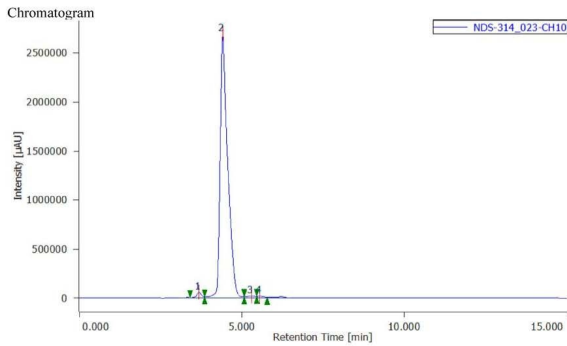

### Chromatogram Information

User Name Administrator  
 Date Modified 9/14/2017 6:43:51 PM  
 Description  
 HPLC System Name Jasco HPLC-4000  
 Injection Date 9/14/2017 5:37:11 PM  
 Volume 20.00 [µL]  
 Sample # 22  
 Project Name DST  
 Acquisition Time 15.0 [min]  
 Acquisition Sequence  
 Control Method 15min6040meohbuffer1.0mlpermin  
 Peak ID Table

### Peak Information

| Peak Name | CH | IR [min] | Area [µVsec] | Height [µV] | Area%  | Height% | NTP  | Resolution | Symmetry Factor |
|-----------|----|----------|--------------|-------------|--------|---------|------|------------|-----------------|
| 1 Unknown | 10 | 3.687    | 621671       | 59431       | 1.393  | 2.129   | 3542 | 2.211      | N/A             |
| 2 Unknown | 10 | 4.413    | 43354931     | 2694046     | 97.142 | 96.494  | 2197 | N/A        | 1.846           |
| 3 Unknown | 10 | 5.297    | 397740       | 20636       | 0.915  | 0.739   | N/A  | N/A        | N/A             |
| 4 Unknown | 10 | 5.557    | 263279       | 17818       | 0.590  | 0.638   | N/A  | N/A        | N/A             |

## HPLC (peak purity) of 7n

Benzimidazole derivatives\_0914 NDS-314\_023 9/22/2017 10:58:31 AM

Institute of Pharmacy, Nirma University

Report - HPLC peak purity

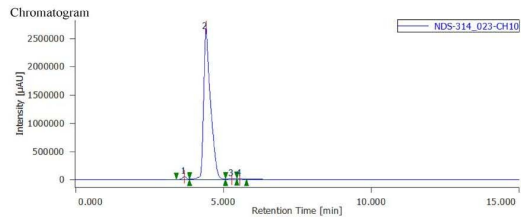

### Peak Purity Info

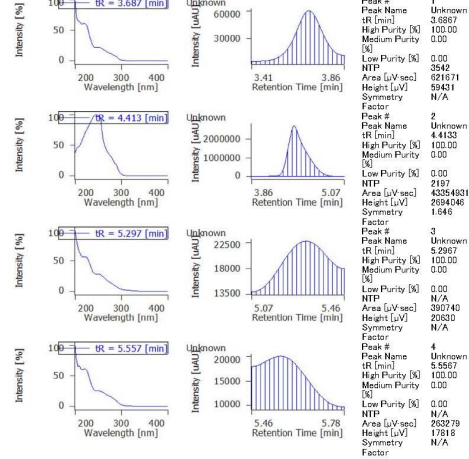

## FTIR spectra of 7o

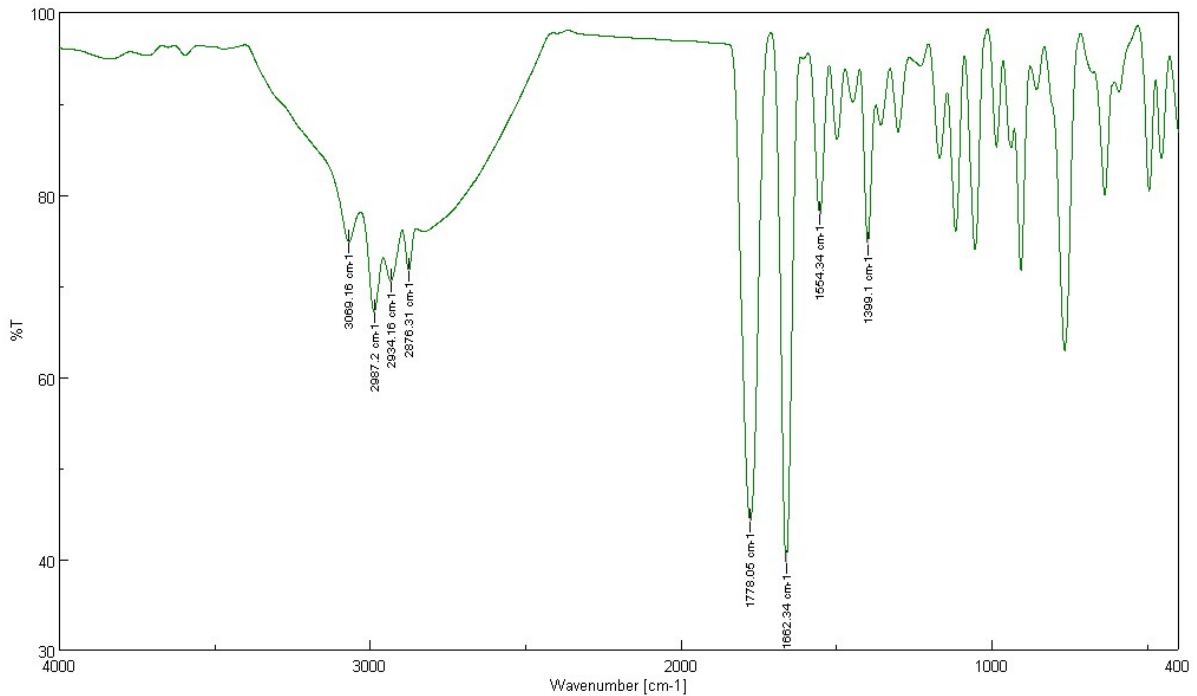

## MASS Analysis of synthesized compound: 7o M+1: 420

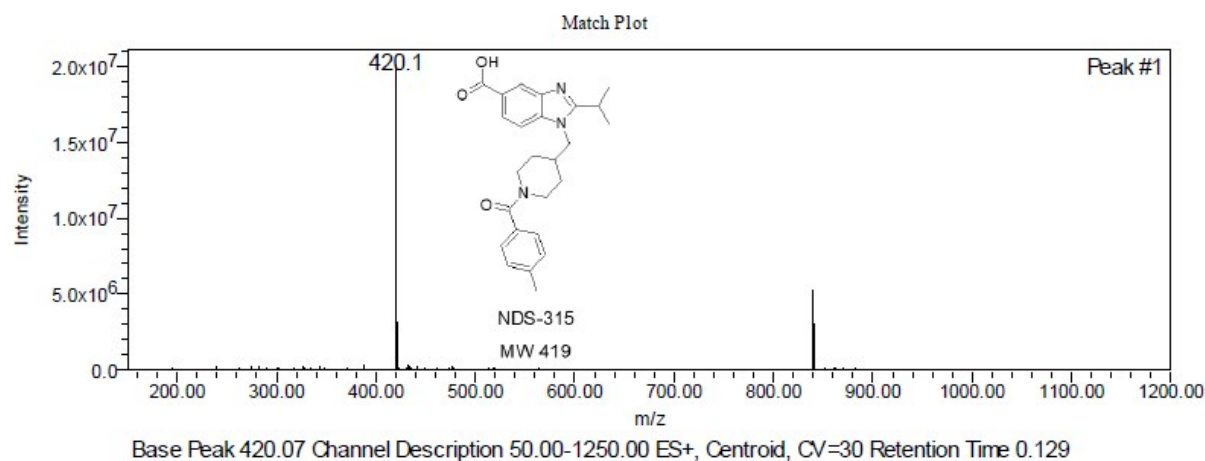

## <sup>1</sup>H-NMR Analysis of synthesized compound: 7o

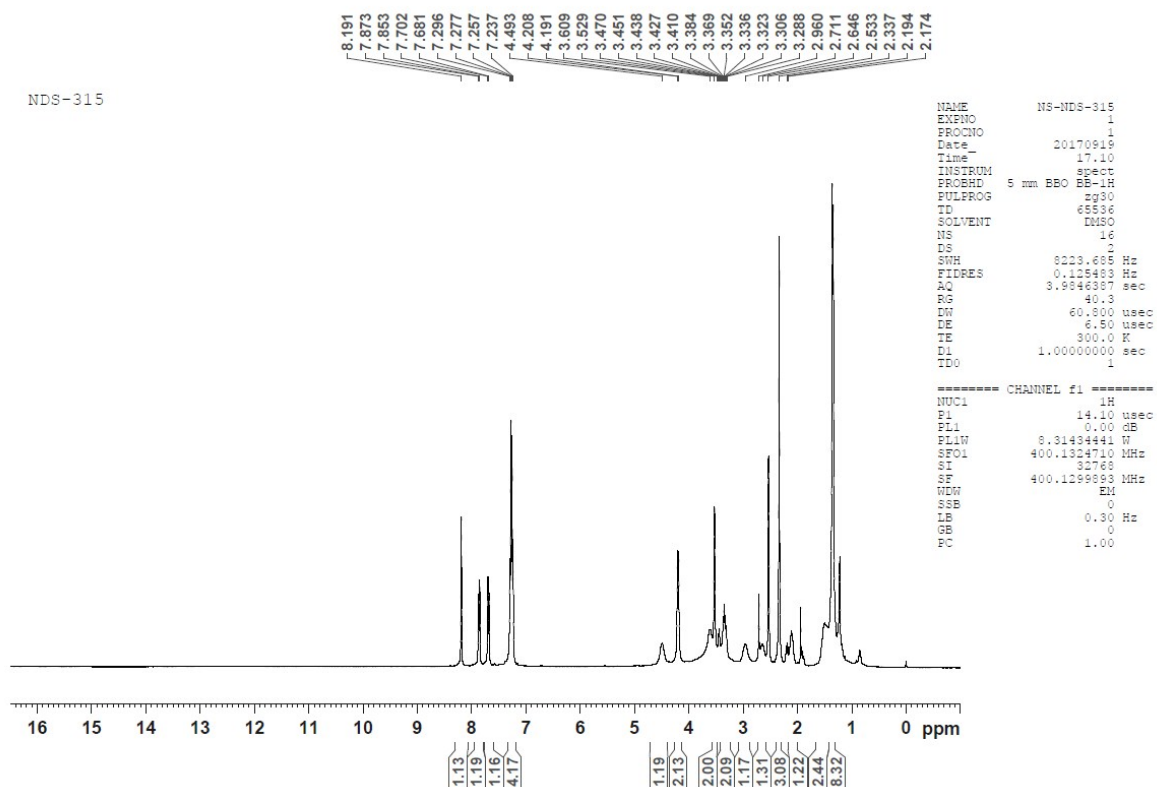

# 1H-NMR-D2O exchange analysis of synthesized compound: 7o

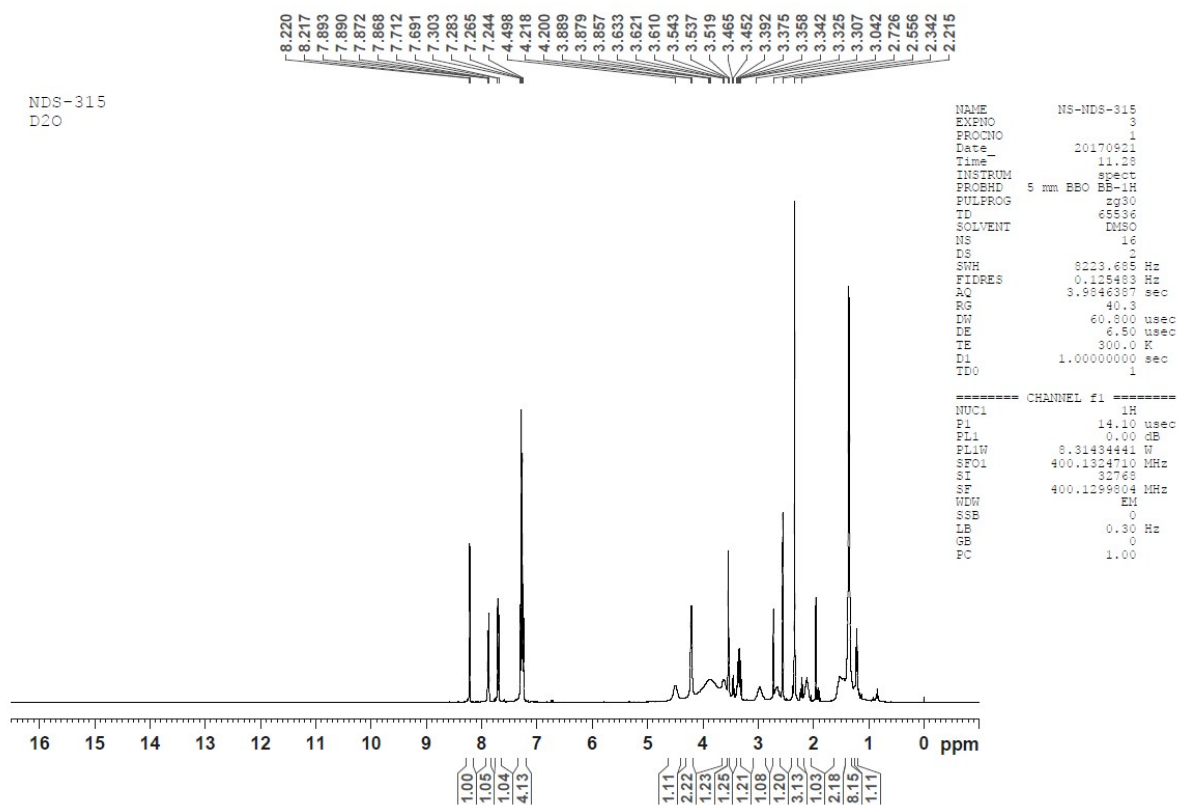

# 13C-NMR Analysis of synthesized compound: 7o

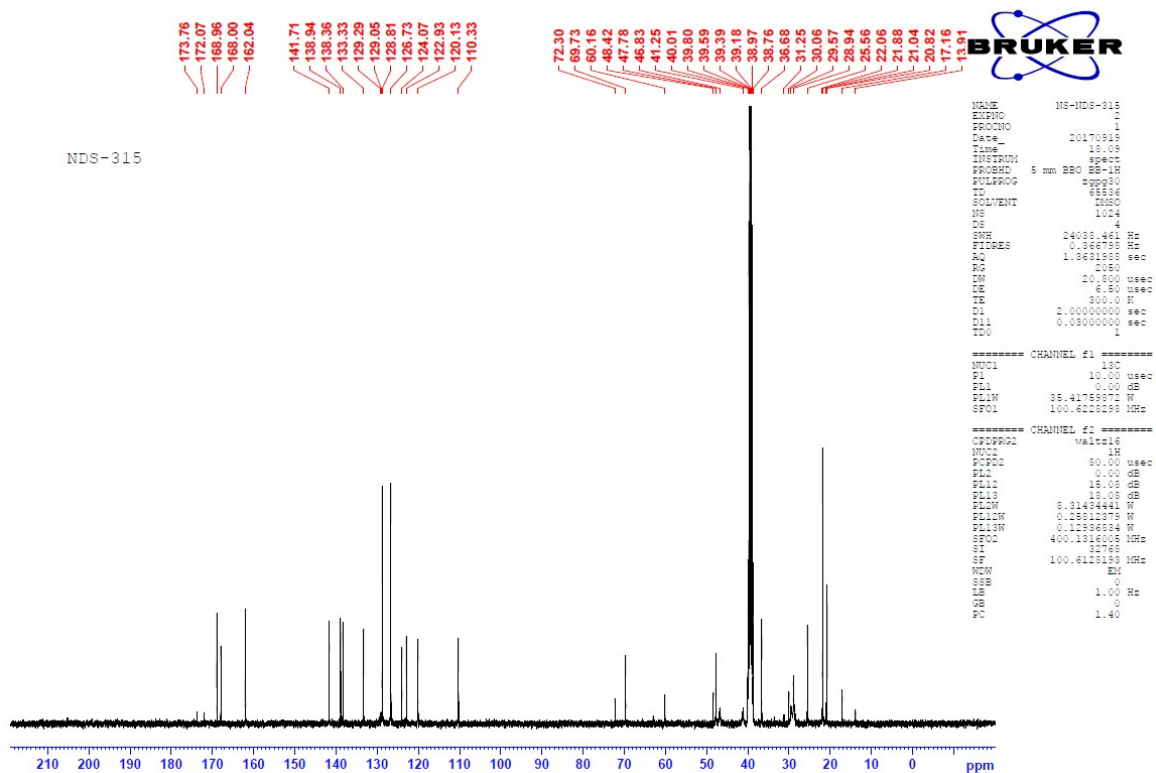

# HPLC (percentage purity) of 7o

Benzimidazolederivatives\_0914 NDS-315\_024 9/16/2017 7:37:14 PM

Institute of Pharmacy, Nirma University

Report - HPLC analysis

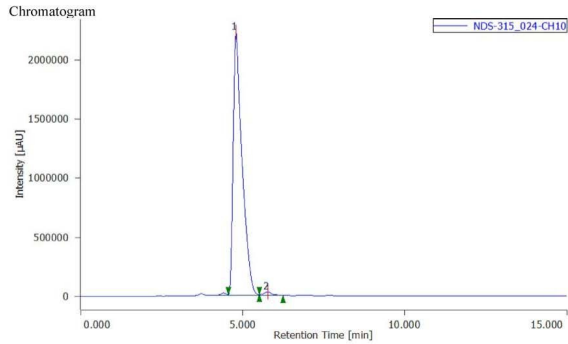

### Chromatogram Information

User Name Administrator  
 Date Modified 9/14/2017 7:11:45 PM  
 Description  
 HPLC System Name Jasco HPLC-4000  
 Injection Date 9/14/2017 5:55:03 PM  
 Volume 20.00 [μL]  
 Sample # 23  
 Project Name DST  
 Acquisition Time 15.0 [min]  
 Acquisition Sequence  
 Control Method 15min6040meohbuffer1.0mlpermin  
 Peak ID Table

### Peak Information

| # | Peak Name | CH | TR [min] | Area [uVsec] | Height [uV] | Area%  | Height% | NTP   | Resolution | Symmetry Factor |
|---|-----------|----|----------|--------------|-------------|--------|---------|-------|------------|-----------------|
| 1 | Unknown   | 10 | 4.797    | 42213264     | 2224509     | 98.737 | 98.704  | 1.757 | 2.070      | 1.870           |
| 2 | Unknown   | 10 | 5.777    | 540124       | 29202       | 1.263  | 1.296   | 2613  | N/A        | N/A             |

# HPLC (peak purity) of 7o

Benzimidazolederivatives\_0914 NDS-315\_024 9/22/2017 10:56:48 AM

Institute of Pharmacy, Nirma University

Report - HPLC peak purity

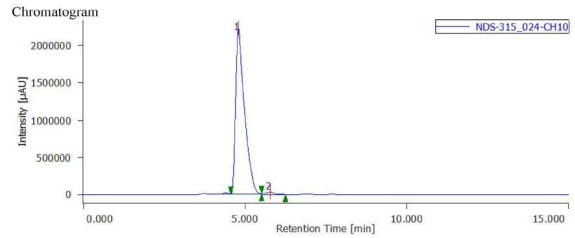

### Peak Purity Info

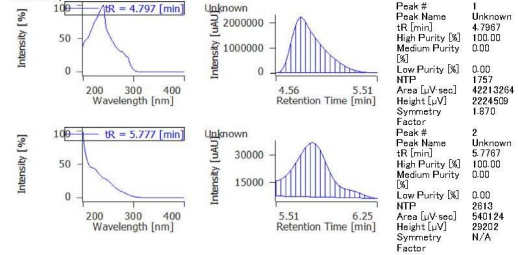

| Peak # | Peak Name | TR [min] | High Purity [X] | Medium Purity [X] | Low Purity [X] | NTP  | Area [uVsec] | Height [uV] | Symmetry Factor |
|--------|-----------|----------|-----------------|-------------------|----------------|------|--------------|-------------|-----------------|
| 1      | Unknown   | 4.797    | 100.00          | 0.00              | 0.00           | 1757 | 42213264     | 2224509     | 1.870           |
| 2      | Unknown   | 5.777    | 100.00          | 0.00              | 0.00           | 2613 | 540124       | 29202       | N/A             |

## Spectral Data for Series 2

### FTIR spectra of 16

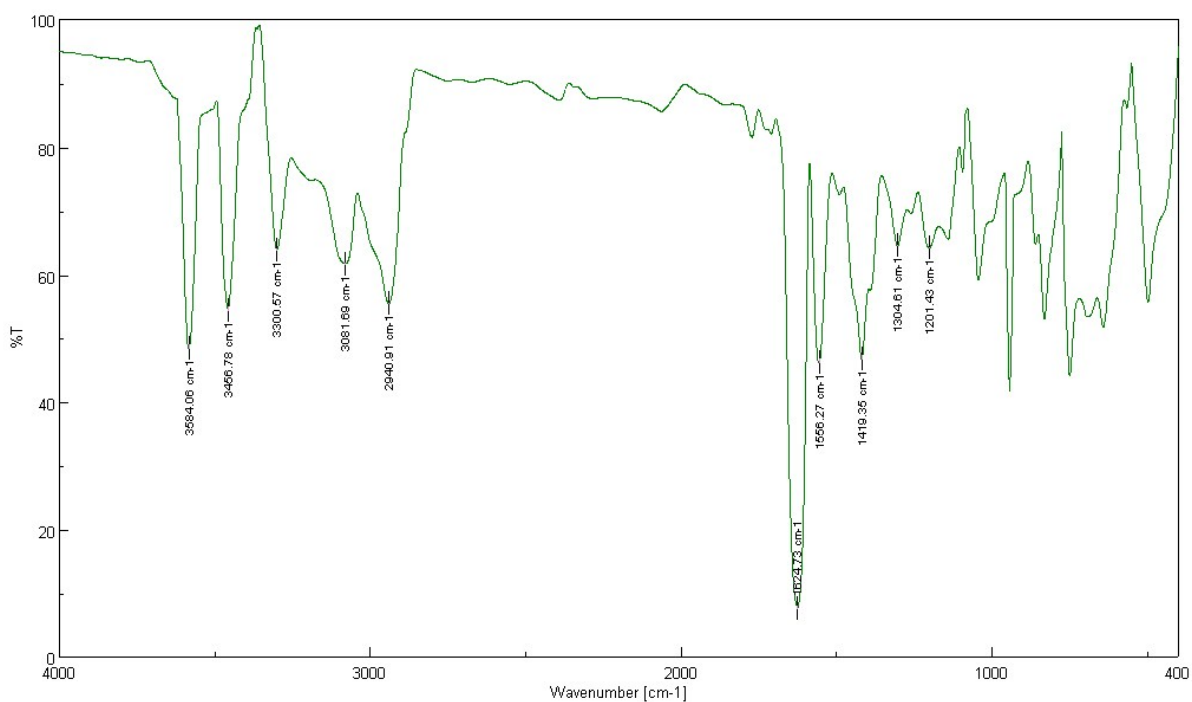

### MASS Analysis of synthesized compound: 16 M+1: 265

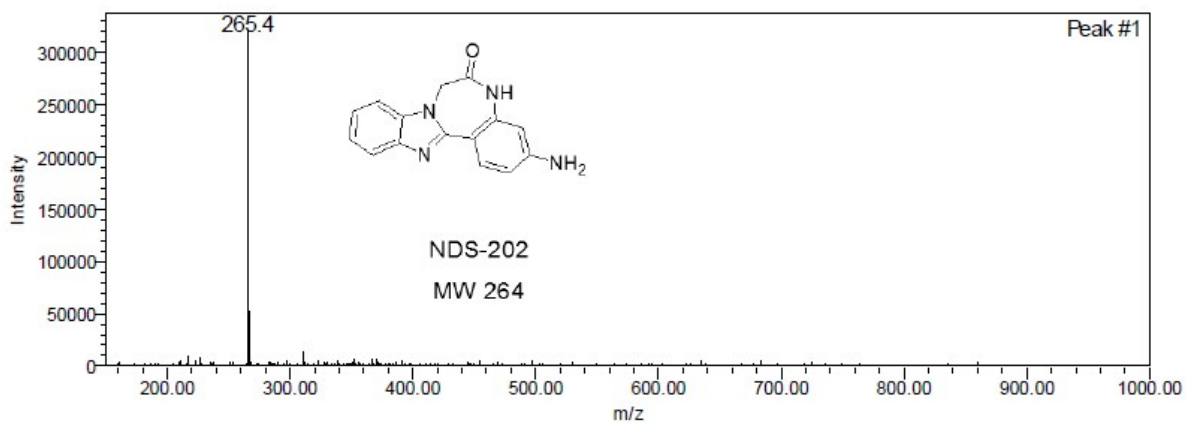

Base Peak 50.15 Channel Description 50.00-1200.00 ES+, Centroid, CV=10 Retention Time 0.235

# 1H-NMR Analysis of synthesized compound: 16

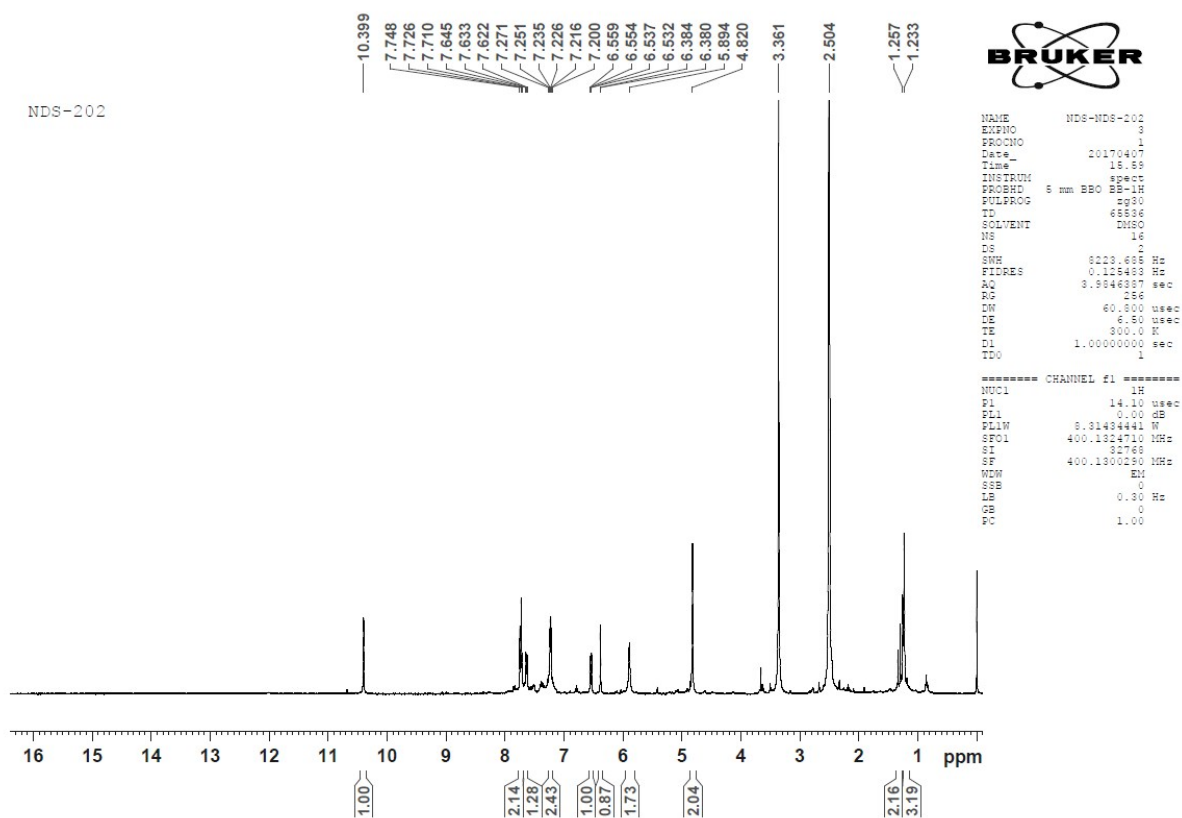

# 1H-NMR-D2O exchange analysis of synthesized compound: 16

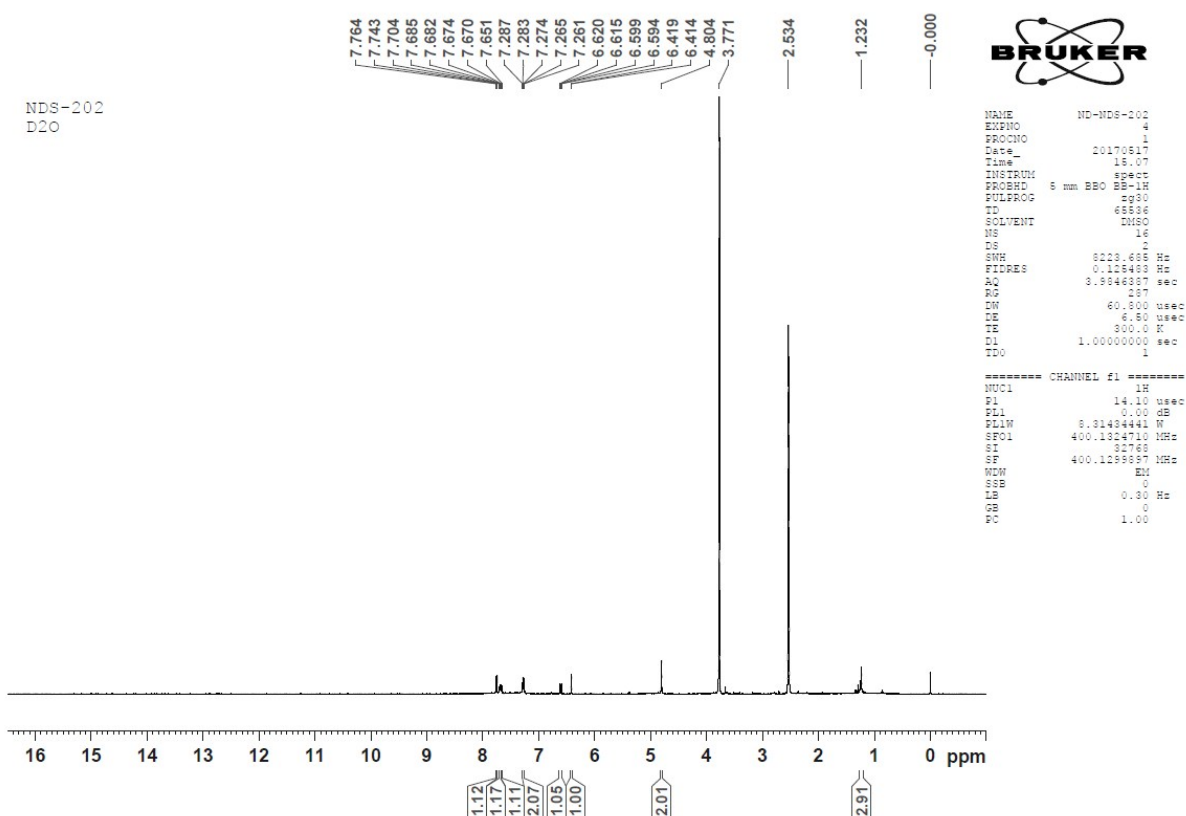

# 13C-NMR Analysis of synthesized compound: 16

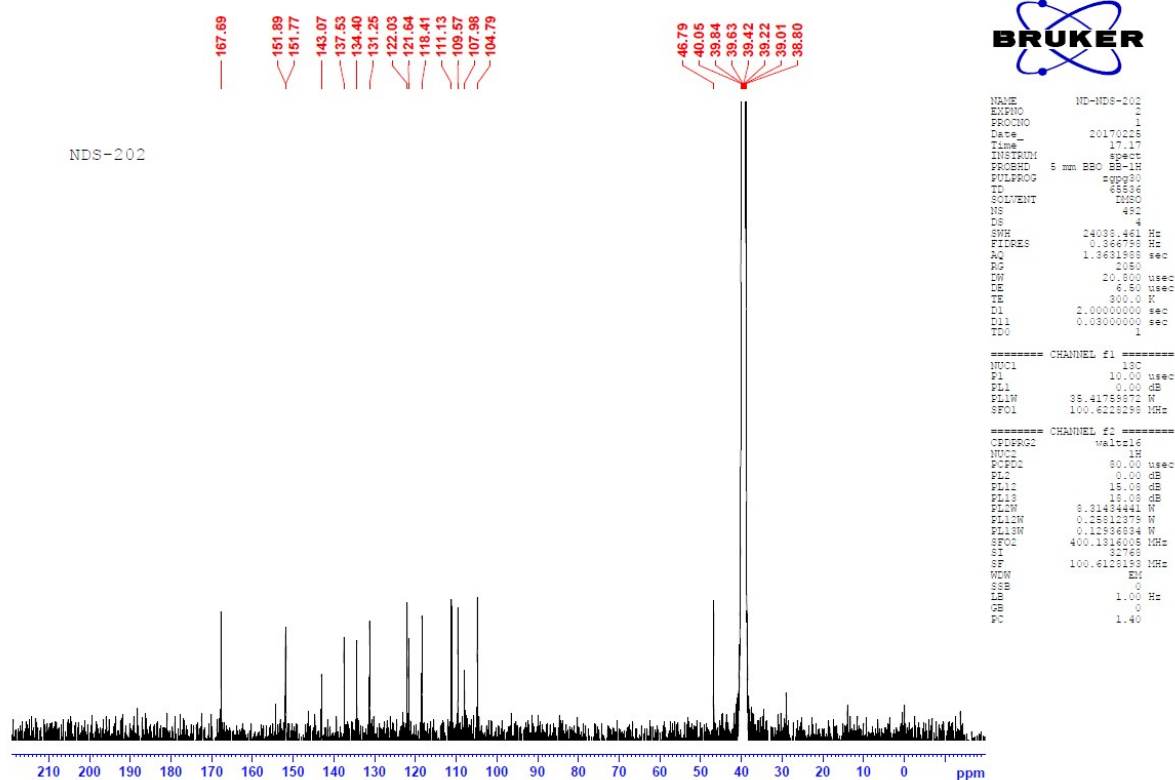

## HPLC (percentage purity) of 16

Benzimidazole derivatives\_0915 nds-202\_023 9/16/2017 7:15:33 PM

Institute of Pharmacy, Nirma University

Report - HPLC analysis

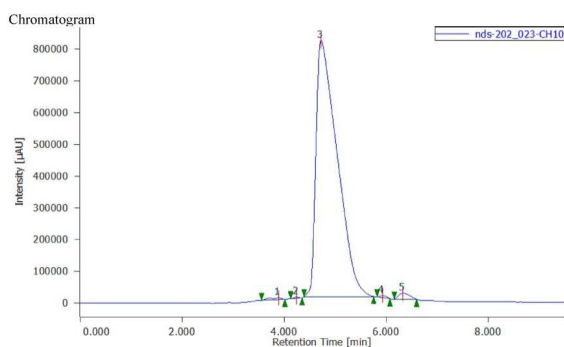

### Chromatogram Information

User Name Administrator  
Date Modified 9/15/2017 7:15:25 PM  
Description  
HPLC System Name Jasco HPLC-4000  
Injection Date 9/15/2017 5:11:00 PM  
Volume 20.00 [µL]  
Sample # 20  
Project Name DST  
Acquisition Time 9.5 [min]  
Acquisition Sequence  
Control Method 10min8020meohbuffer1mlpermin  
Peak ID Table

### Peak Information

| # | Peak Name | CH | IR [min] | Area [µVsec] | Height [µV] | Area%  | Height% | NTP   | Resolution | Symmetry Factor |
|---|-----------|----|----------|--------------|-------------|--------|---------|-------|------------|-----------------|
| 1 | Unknown   | 10 | 3.893    | 96792        | 5033        | 0.417  | 0.721   | 702   | 0.979      | 0.951           |
| 2 | Unknown   | 10 | 4.247    | 26430        | 2397        | 0.111  | 0.468   | 1253  | 0.969      | 0.984           |
| 3 | Unknown   | 10 | 4.727    | 23257571     | 807286      | 98.063 | 95.777  | 615   | 2.397      | 2.341           |
| 4 | Unknown   | 10 | 5.833    | 56784        | 7054        | 0.239  | 0.837   | 10934 | 1.219      | 1.192           |
| 5 | Unknown   | 10 | 6.333    | 277399       | 18543       | 1.176  | 2.205   | 3244  | N/A        | 1.292           |

## HPLC (peak purity) of 16

Benzimidazole derivatives\_0915 nds-202\_023 9/22/2017 10:23:11 AM

Institute of Pharmacy, Nirma University

Report - HPLC peak purity

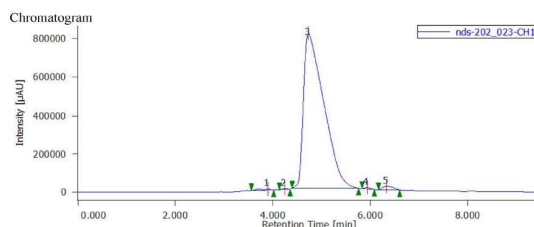

### Peak Purity Info

| Peak # | Peak Name | IR [min] | High Purity [%] | Medium Purity [%] | Low Purity [%] | NTP   | Area [µVsec] | Height [µV] | Symmetry Factor |
|--------|-----------|----------|-----------------|-------------------|----------------|-------|--------------|-------------|-----------------|
| 1      | Unknown   | 3.8933   | 97.69           | 2.40              | 0.00           | 702   | 96792        | 6073        | 0.951           |
| 5      | Unknown   | 4.2467   | 100.00          | 0.00              | 0.00           | 7530  | 26430        | 3927        | 0.984           |
| 2      | Unknown   | 4.7267   | 100.00          | 0.00              | 0.00           | 615   | 23257571     | 807286      | 2.341           |
| 4      | Unknown   | 5.8333   | 100.00          | 0.00              | 0.00           | 10934 | 56784        | 7054        | 1.192           |



## FTIR spectra of 17a

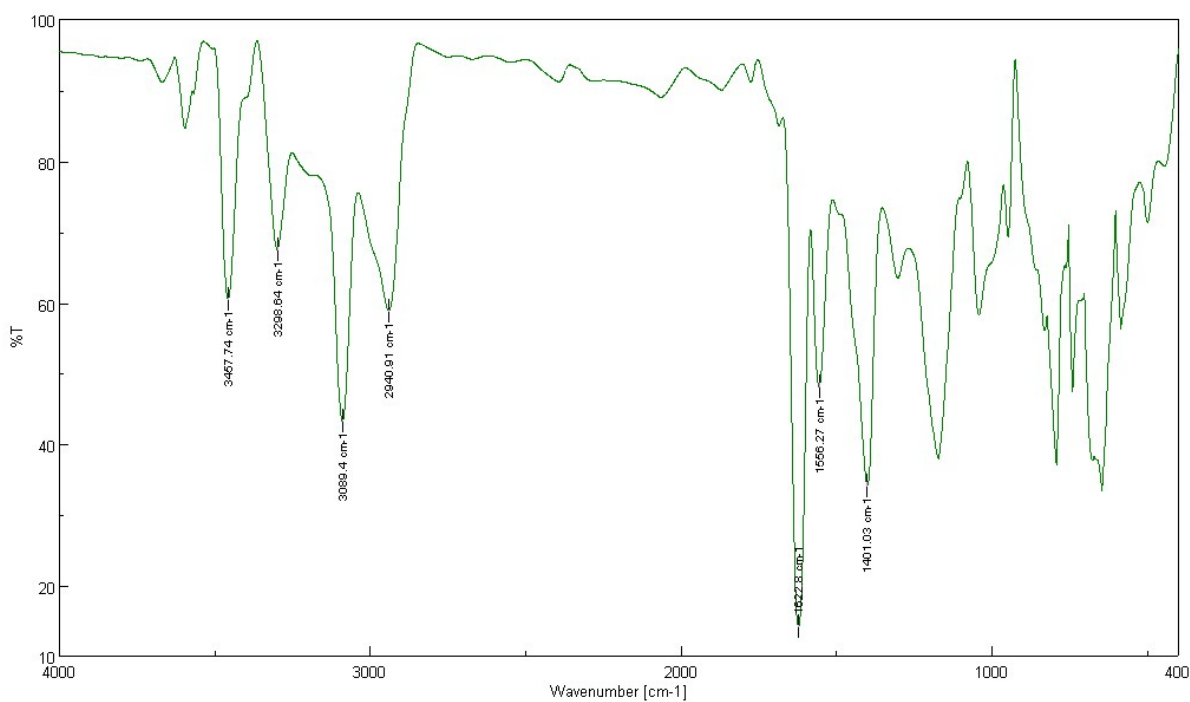

## MASS Analysis of synthesized compound: 17a M+1: 369

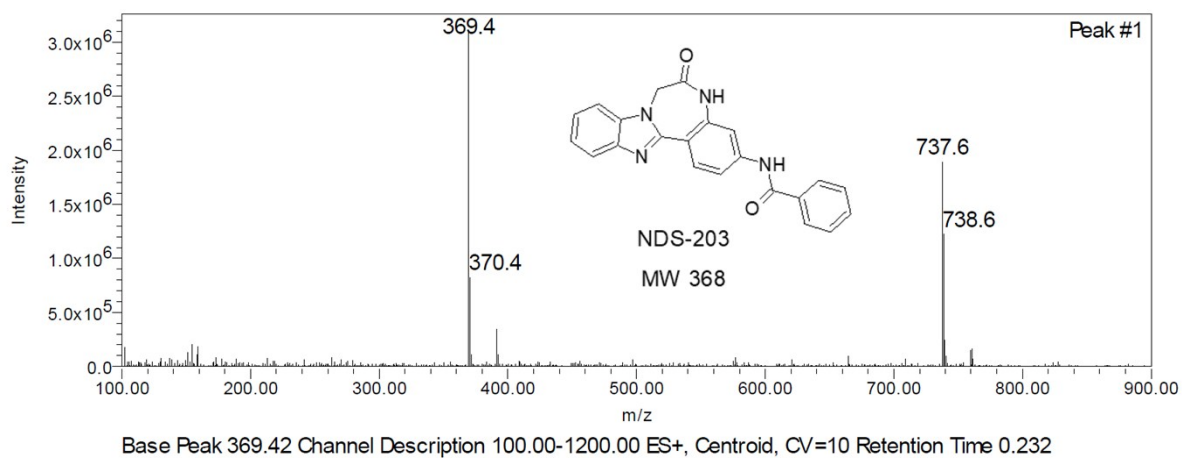

# 1H-NMR Analysis of synthesized compound: 17a

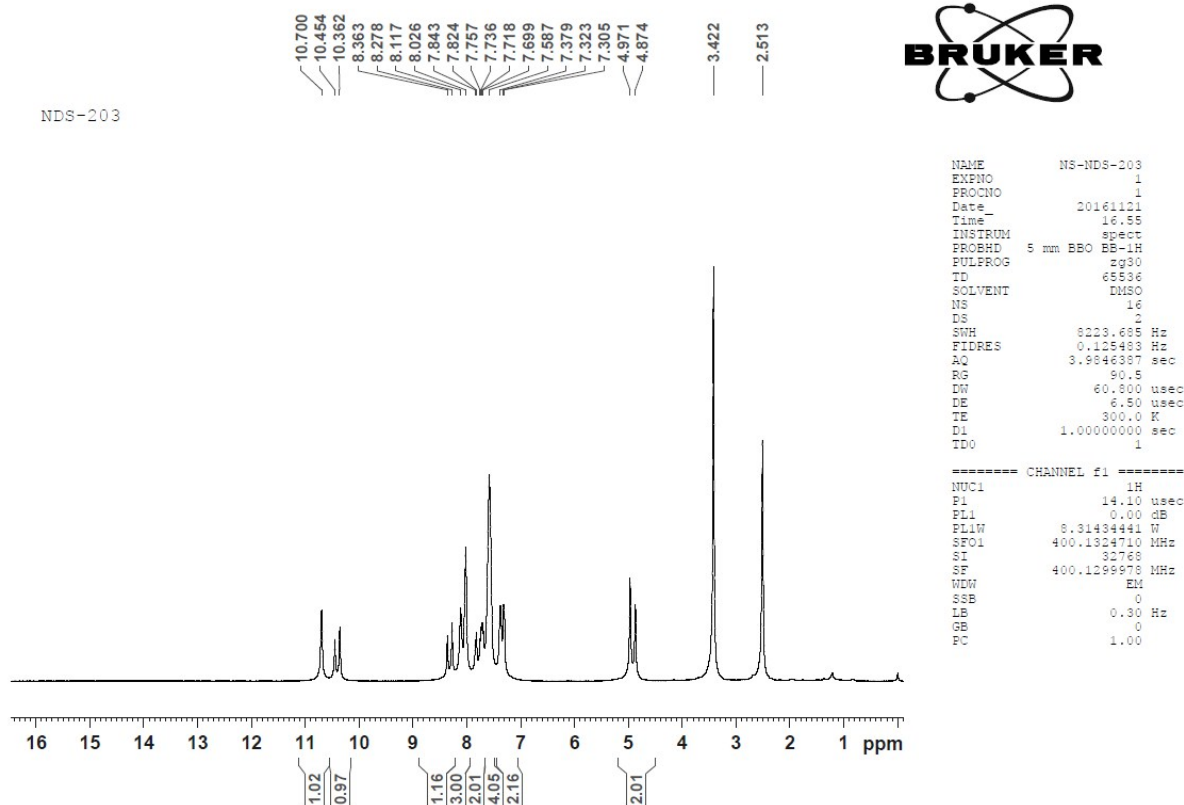

# 13C-NMR Analysis of synthesized compound: 17a

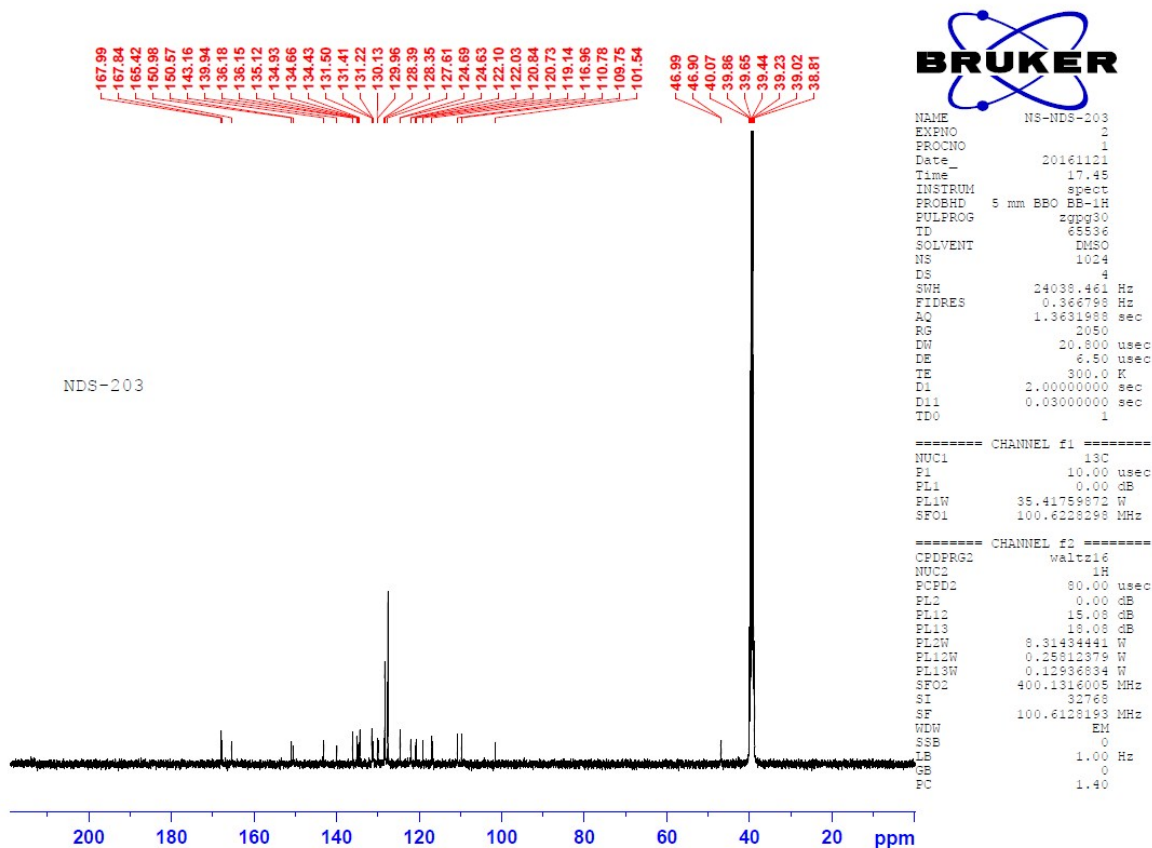

## HPLC (percentage purity) of 17a

Benzimidazole derivatives\_0915 nds-203\_019 9/16/2017 7:14:38 PM

Institute of Pharmacy, Nirma University

Report - HPLC analysis

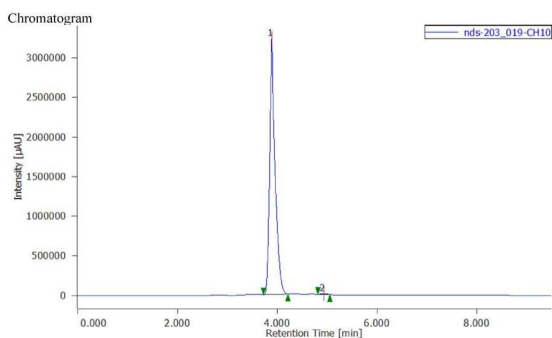

### Chromatogram Information

User Name Administrator  
 Date Modified 9/15/2017 7:15:15 PM  
 Description  
 HPLC System Name Jasco HPLC-4000  
 Injection Date 9/15/2017 4:20:35 PM  
 Volume 20.00 [μL]  
 Sample # 16  
 Project Name DST  
 Acquisition Time 9.5 [min]  
 Acquisition Sequence  
 Control Method 10min8020meohbuffer1mlpermin  
 Peak ID Table

### Peak Information

| # | Peak Name | CH | IR [min] | Area [μVsec] | Height [μV] | Area%  | Height% | NTP  | Resolution | Symmetry Factor |
|---|-----------|----|----------|--------------|-------------|--------|---------|------|------------|-----------------|
| 1 | Unknown   | 10 | 3.893    | 24081427     | 3229802     | 99.698 | 99.738  | 9884 | 4.888      | 1.440           |
| 2 | Unknown   | 10 | 4.933    | 73006        | 8559        | 0.302  | 0.264   | 8089 | N/A        | 1.059           |

## HPLC (peak purity) of 17a

Benzimidazole derivatives\_0915 nds-203\_019 9/22/2017 10:30:10 AM

Institute of Pharmacy, Nirma University

Report - HPLC peak purity

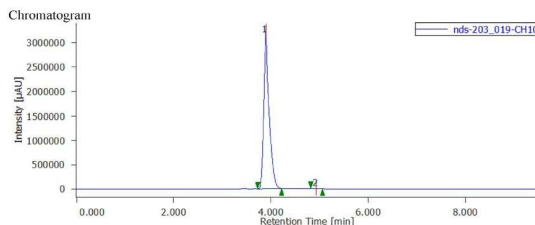

### Peak Purity Info

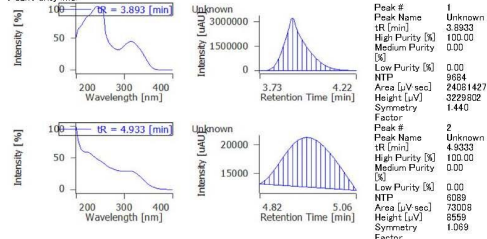

Peak # 1  
 Peak Name Unknown  
 IR [min] 3.8933  
 High Purity [%] 100.00  
 Medium Purity [%] 0.00  
 Low Purity [%] 0.00  
 NTP 9884  
 Area [μVsec] 24081427  
 Height [μV] 3229802  
 Symmetry Factor 1.440

Peak # 2  
 Peak Name Unknown  
 IR [min] 4.9333  
 High Purity [%] 100.00  
 Medium Purity [%] 0.00  
 Low Purity [%] 0.00  
 NTP 6089  
 Area [μVsec] 73006  
 Height [μV] 8559  
 Symmetry Factor 1.059

## FTIR spectra of 17b

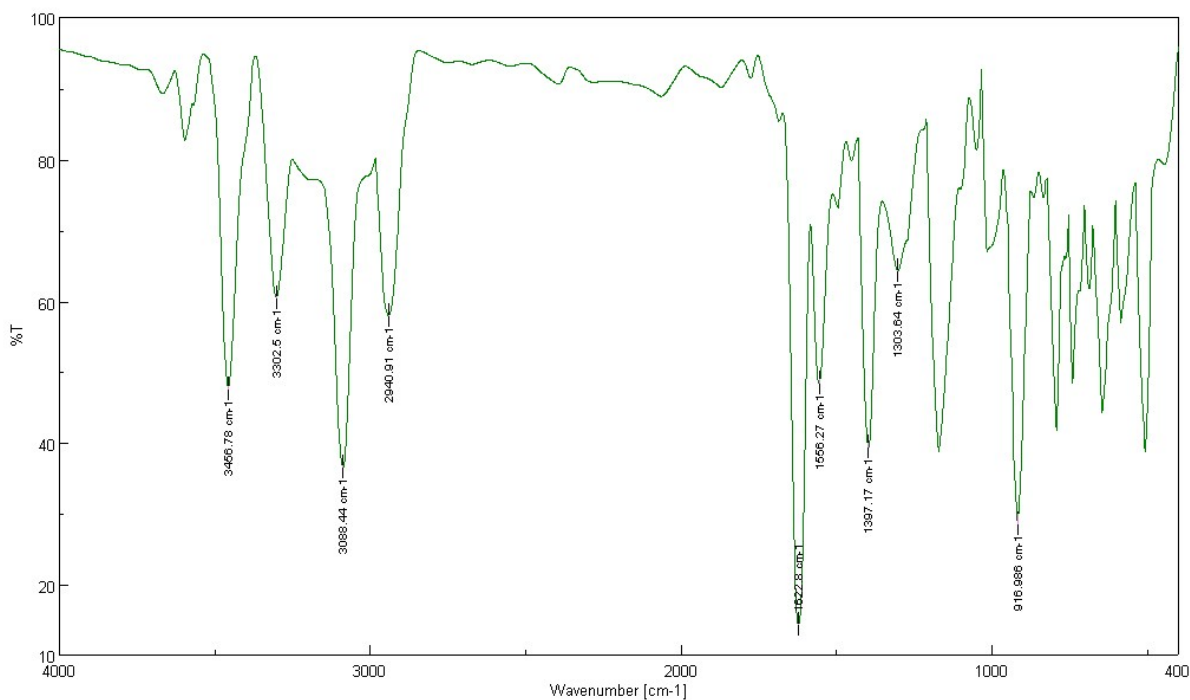

### MASS Analysis of synthesized compound: 17b M+1: 447, M+3: 449

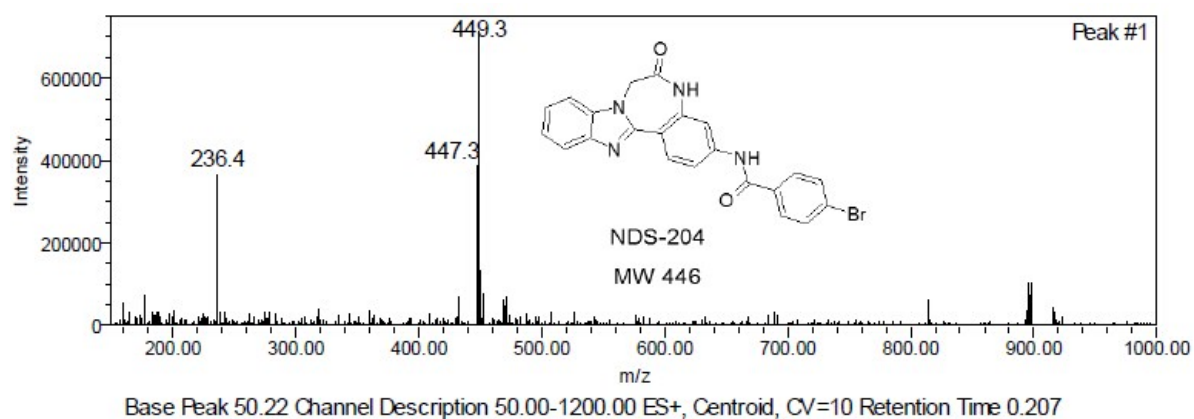

### <sup>1</sup>H-NMR Analysis of synthesized compound: 17b

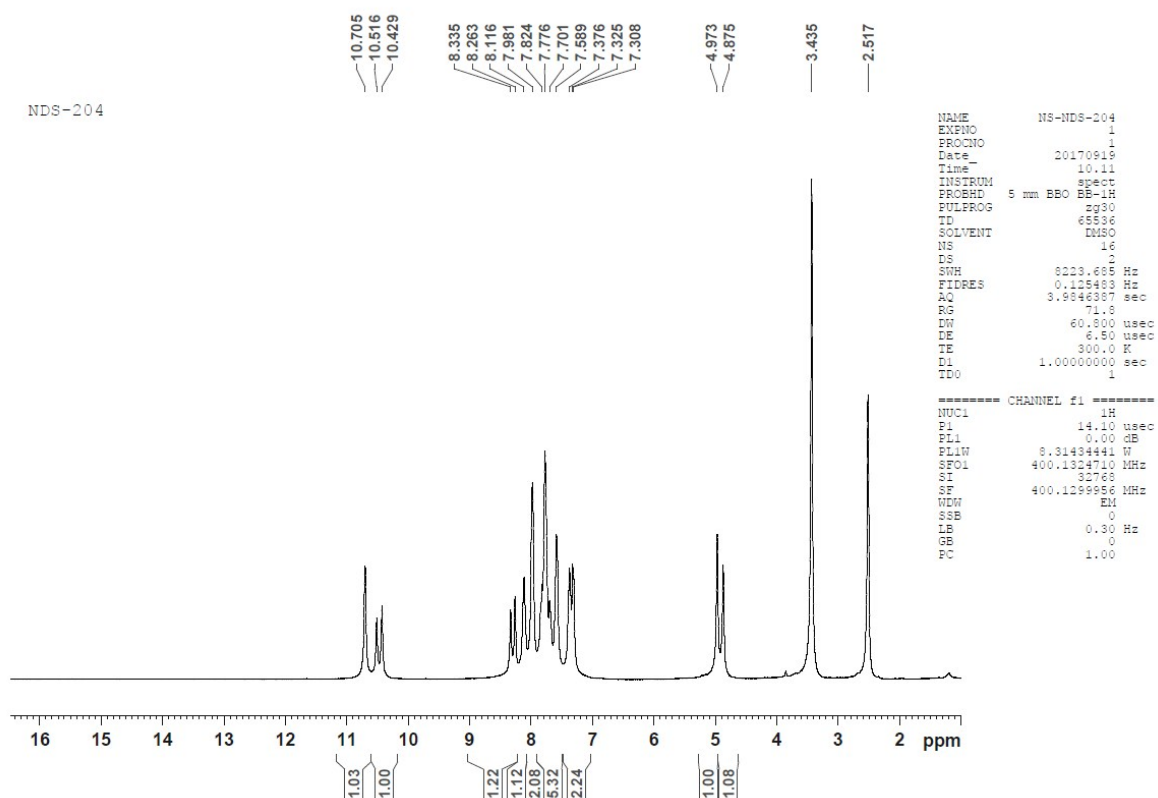

# 1H-NMR-D2O exchange analysis of synthesized compound: 17b

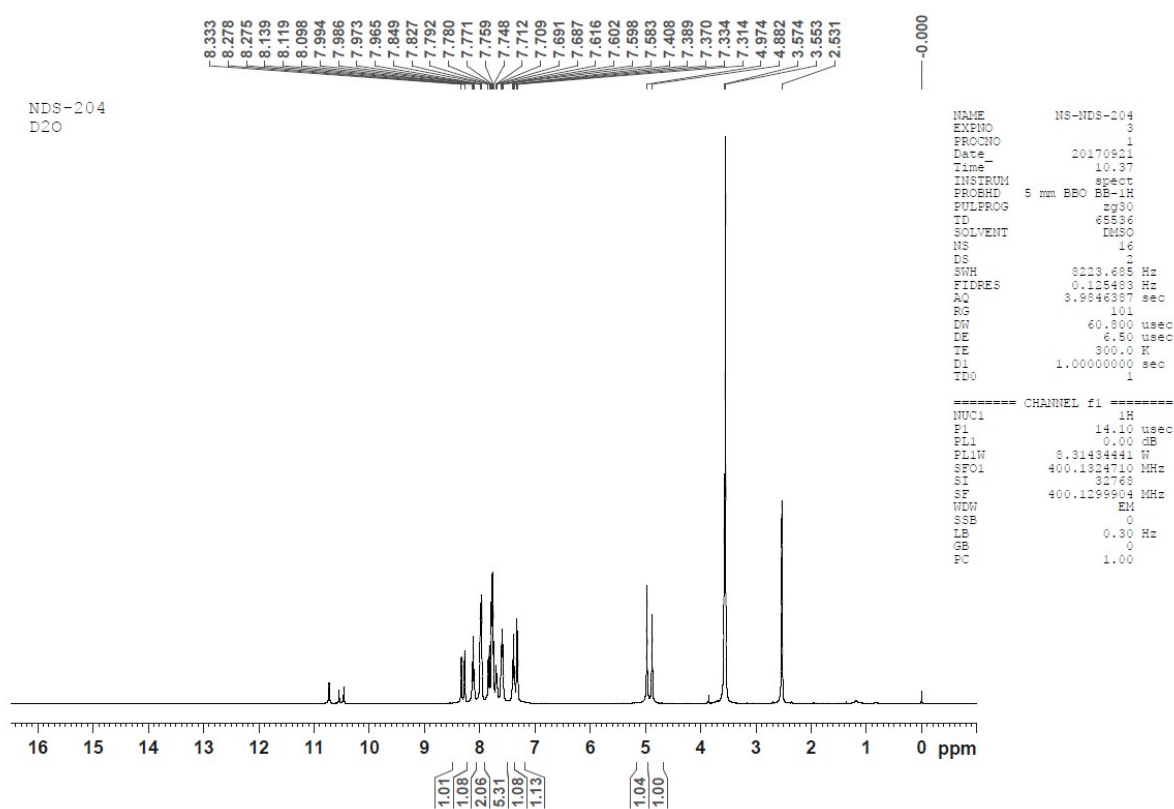

# 13C-NMR Analysis of synthesized compound: 17b

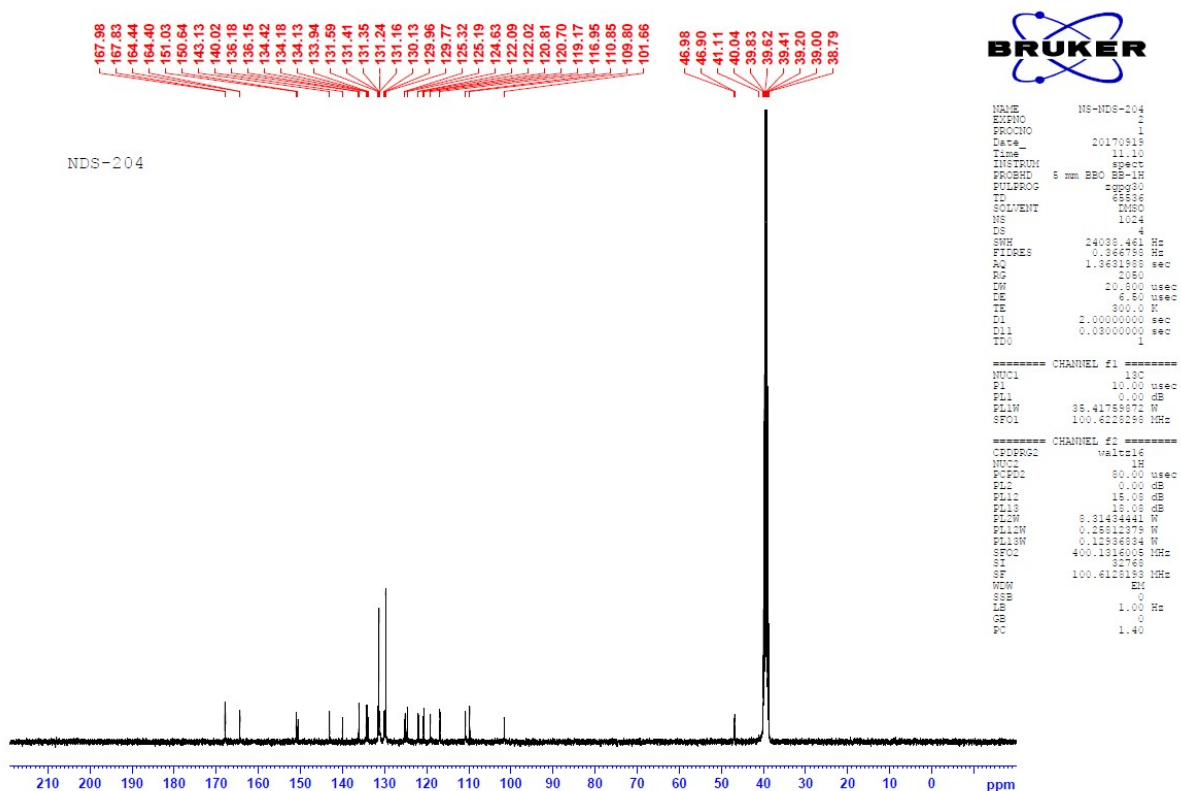

## HPLC (percentage purity) of 17b

Benzimidazole derivatives\_0915 nds-204\_015 9/16/2017 7:18:38 PM

Institute of Pharmacy, Nirma University

Report - HPLC analysis

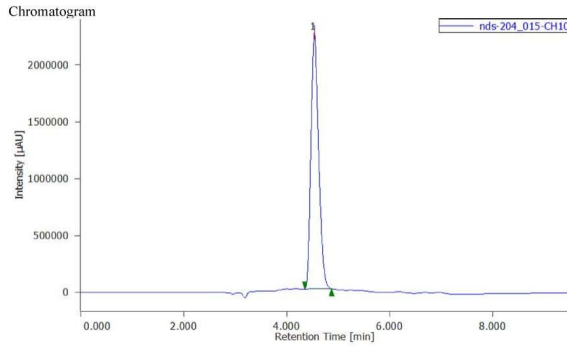

### Chromatogram Information

User Name Administrator  
 Date Modified 9/15/2017 7:15:10 PM  
 Description  
 HPLC System Name Jasco HPLC-4000  
 Injection Date 9/15/2017 3:05:48 PM  
 Volume 20.00 [µL]  
 Sample # 12  
 Project Name DST  
 Acquisition Time 9.5 [min]  
 Acquisition Sequence  
 Control Method 10min8020meohbuffer1mlpermin  
 Peak ID Table

### Peak Information

| # | Peak Name | CH | TR [min] | Area [µVsec] | Height [µV] | Area%   | Height% | NTP  | Resolution | Symmetry Factor |
|---|-----------|----|----------|--------------|-------------|---------|---------|------|------------|-----------------|
| 1 | Unknown   | 10 | 4.540    | 23317713     | 2253176     | 100.000 | 100.000 | 4352 | N/A        | 1.241           |

## HPLC (peak purity) of 17b

Benzimidazole derivatives\_0915 nds-204\_015 9/22/2017 10:29:35 AM

Institute of Pharmacy, Nirma University

Report - HPLC peak purity

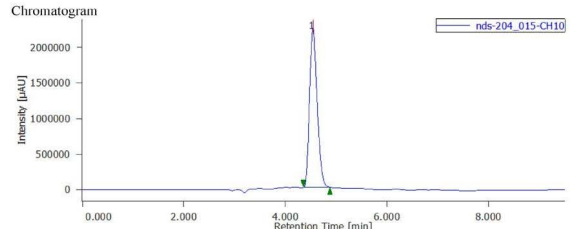

### Peak Purity Info

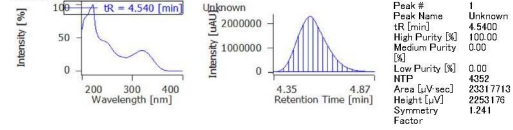

## FTIR spectra of 17c

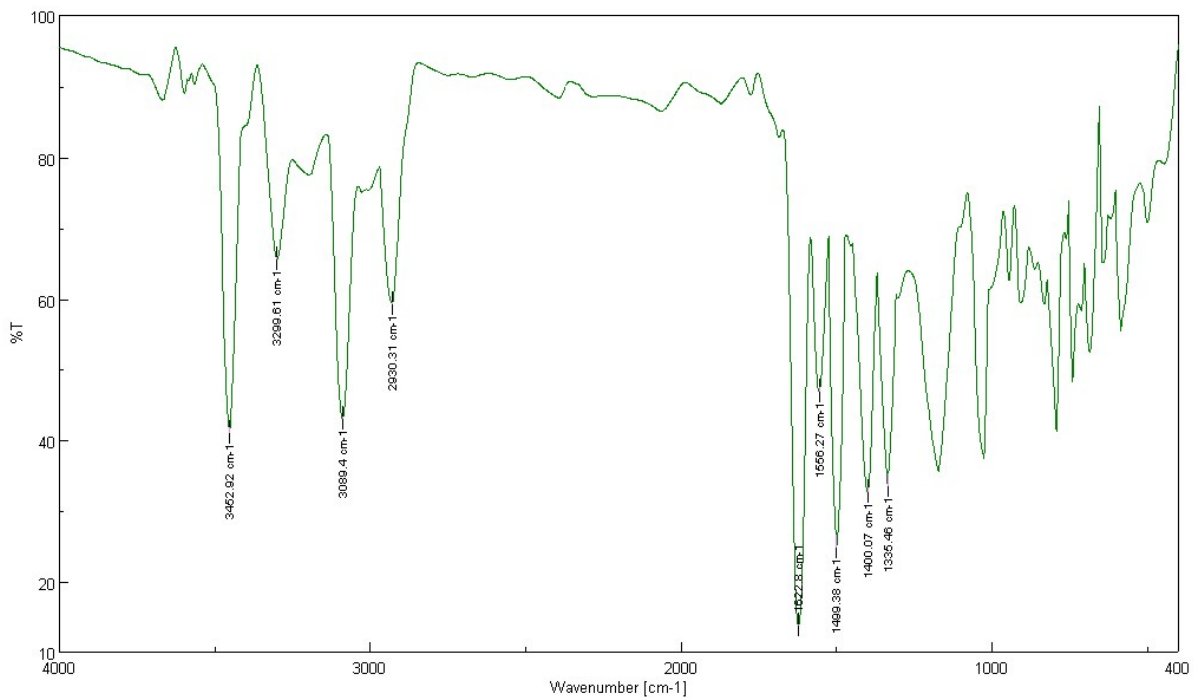

### MASS Analysis of synthesized compound: 17c M+1: 414

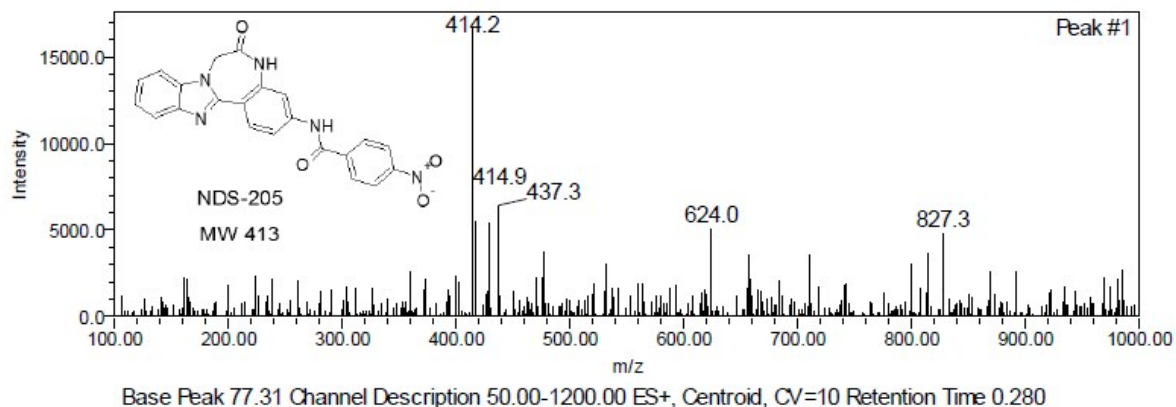

### <sup>1</sup>H-NMR Analysis of synthesized compound: 17c

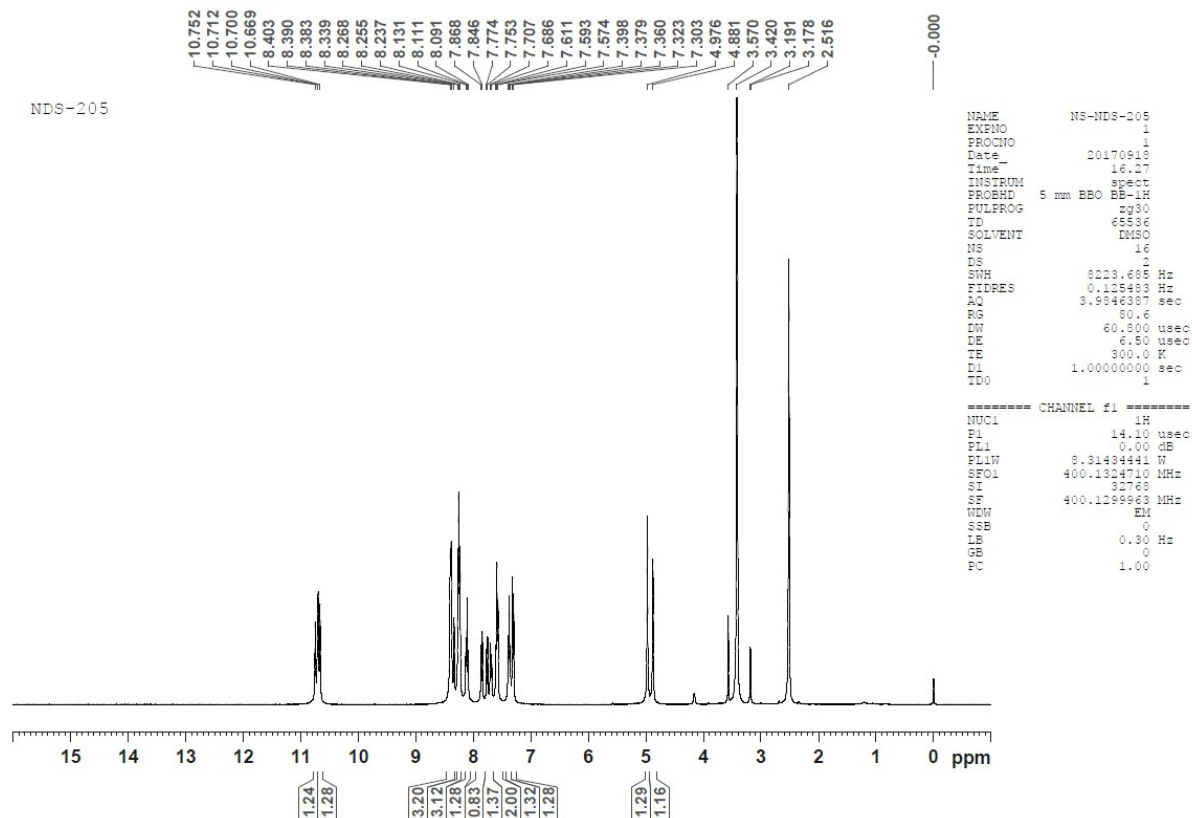

# 1H-NMR-D2O exchange analysis of synthesized compound: 17c

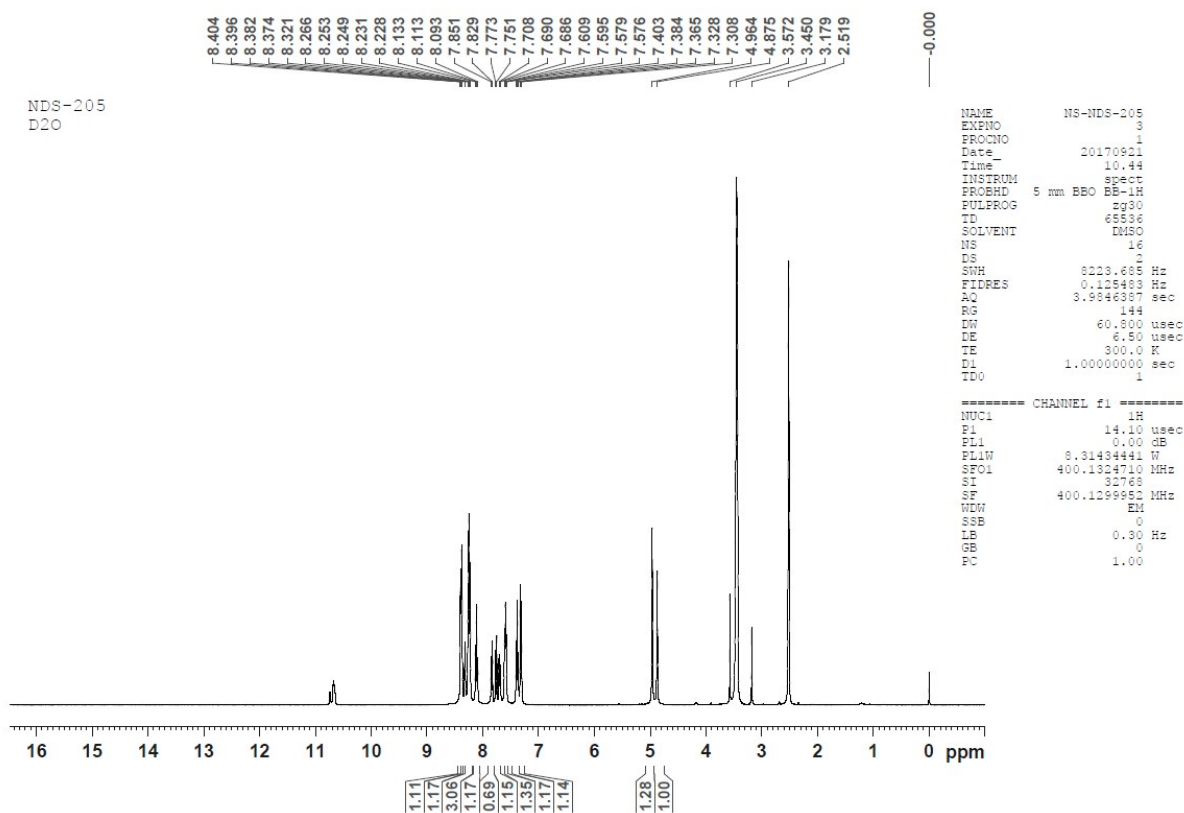

# 13C-NMR Analysis of synthesized compound: 17c

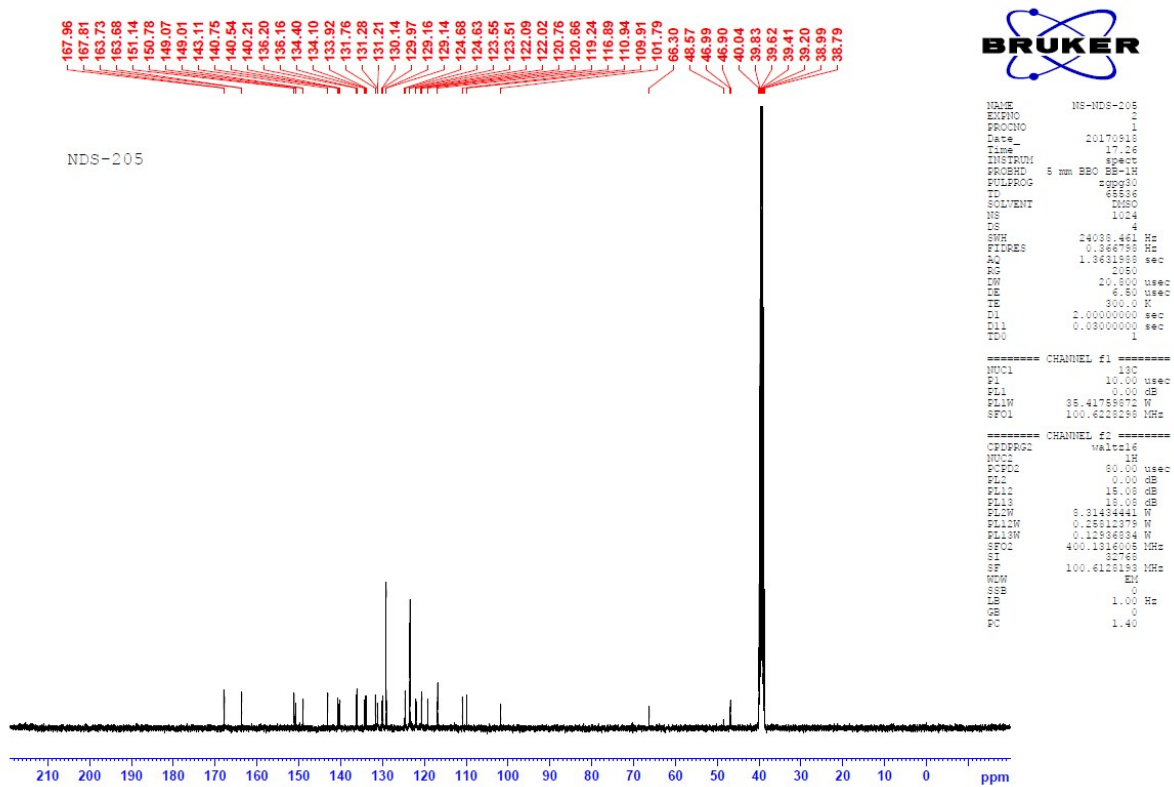



## HPLC (percentage purity) of 17c

Benzimidazole derivatives\_0915 nds-205\_026 9/16/2017 7:15:51 PM

Institute of Pharmacy, Nirma University

Report - HPLC analysis

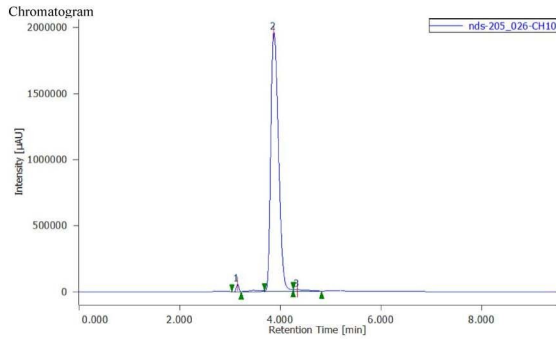

### Chromatogram Information

User Name Administrator  
 Date Modified 9/15/2017 7:15:27 PM  
 Description  
 HPLC System Name Jasco HPLC-4000  
 Injection Date 9/15/2017 5:57:13 PM  
 Volume 20.00 [µL]  
 Sample # 23  
 Project Name DST  
 Acquisition Time 9.5 [min]  
 Acquisition Sequence  
 Control Method 10min8020meohbuffer1mlpermin  
 Peak ID Table

### Peak Information

| # | Peak Name | Ch | RT [min] | Area [µVsec] | Height [µV] | Area%  | Height% | NTP   | Resolution | Symmetry Factor |
|---|-----------|----|----------|--------------|-------------|--------|---------|-------|------------|-----------------|
| 1 | Unknown   | 10 | 3.157    | 203597       | 57725       | 0.953  | 2.839   | 16832 | 3.774      | 0.994           |
| 2 | Unknown   | 10 | 3.877    | 20921904     | 1982338     | 97.898 | 96.6514 | 2877  | N/A        | 1.332           |
| 3 | Unknown   | 10 | 4.343    | 245718       | 13161       | 1.150  | 0.847   | N/A   | N/A        | N/A             |

## HPLC (peak purity) of 17c

Benzimidazole derivatives\_0915 nds-205\_026 9/22/2017 10:41:11 AM

Institute of Pharmacy, Nirma University

Report - HPLC peak purity

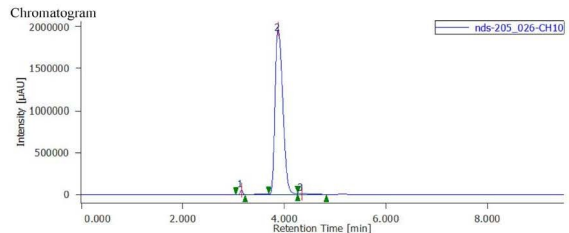

### Peak Purity Info

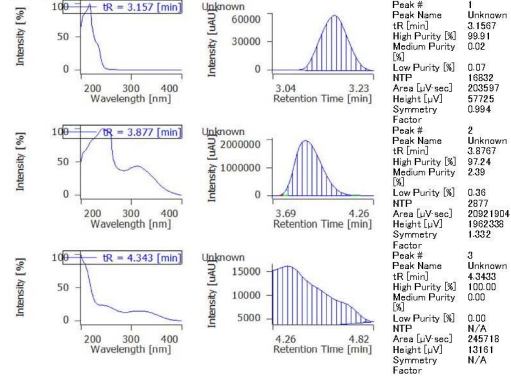

## FTIR spectra of 17d

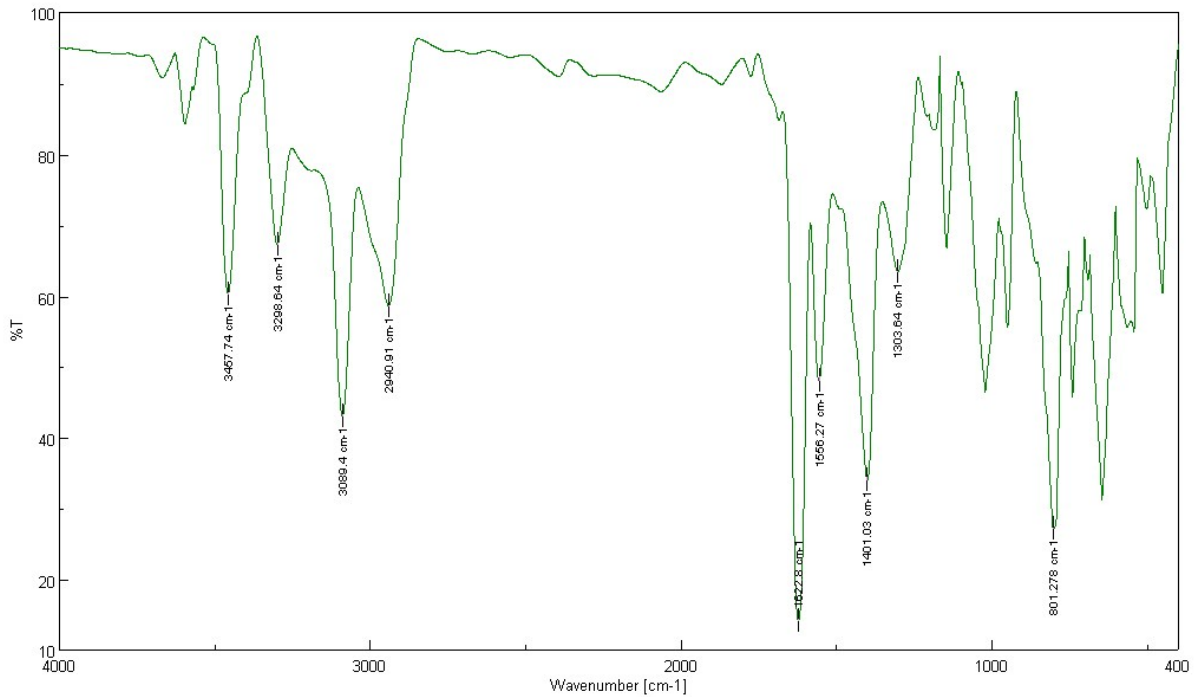

**MASS Analysis of synthesized compound: 17d M+1: 403, M+3: 405**

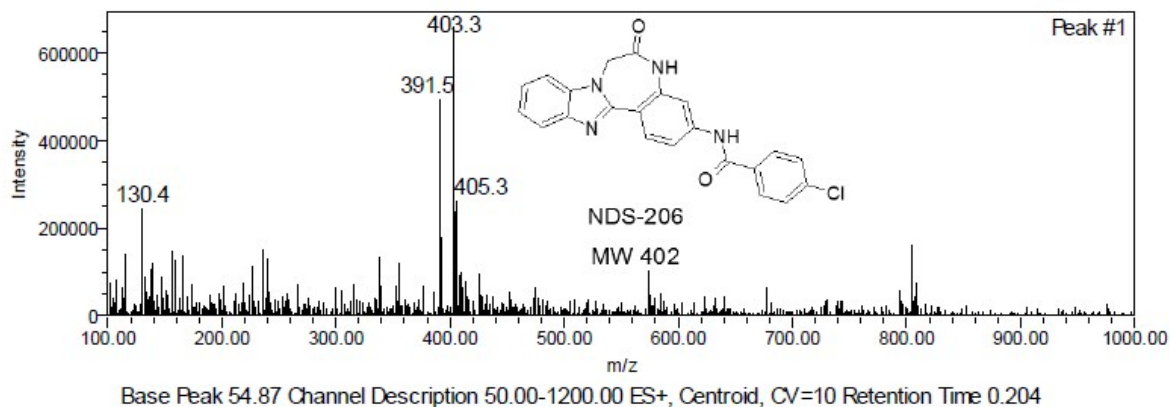

**<sup>1</sup>H-NMR Analysis of synthesized compound: 17d**

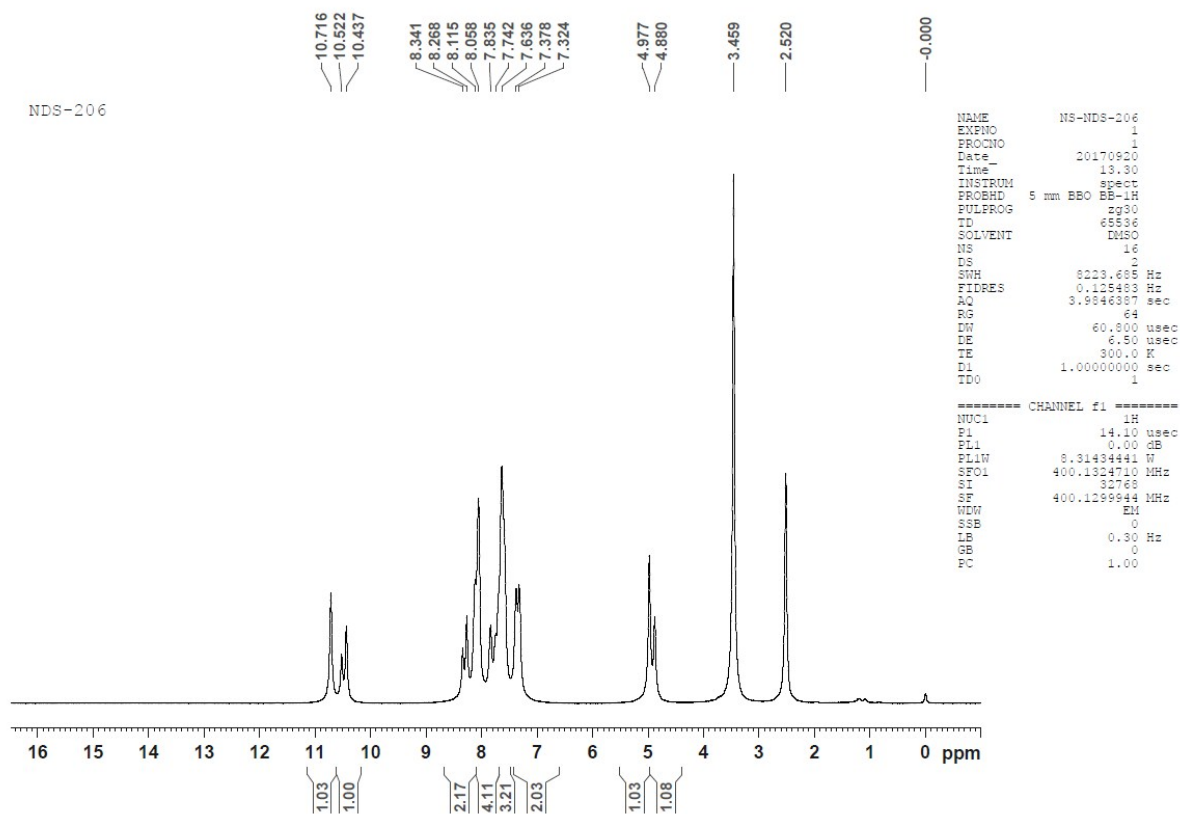

# 1H-NMR-D2O exchange analysis of synthesized compound: 17d

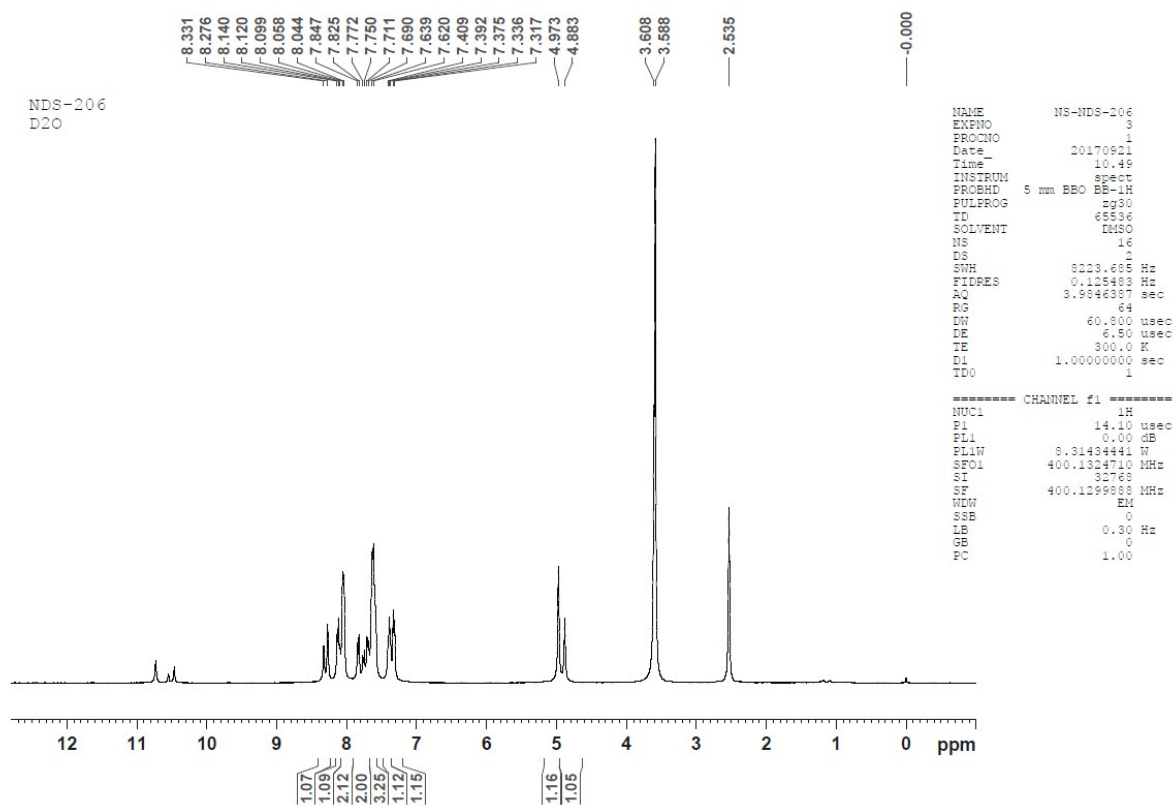

# 13C-NMR Analysis of synthesized compound: 17d

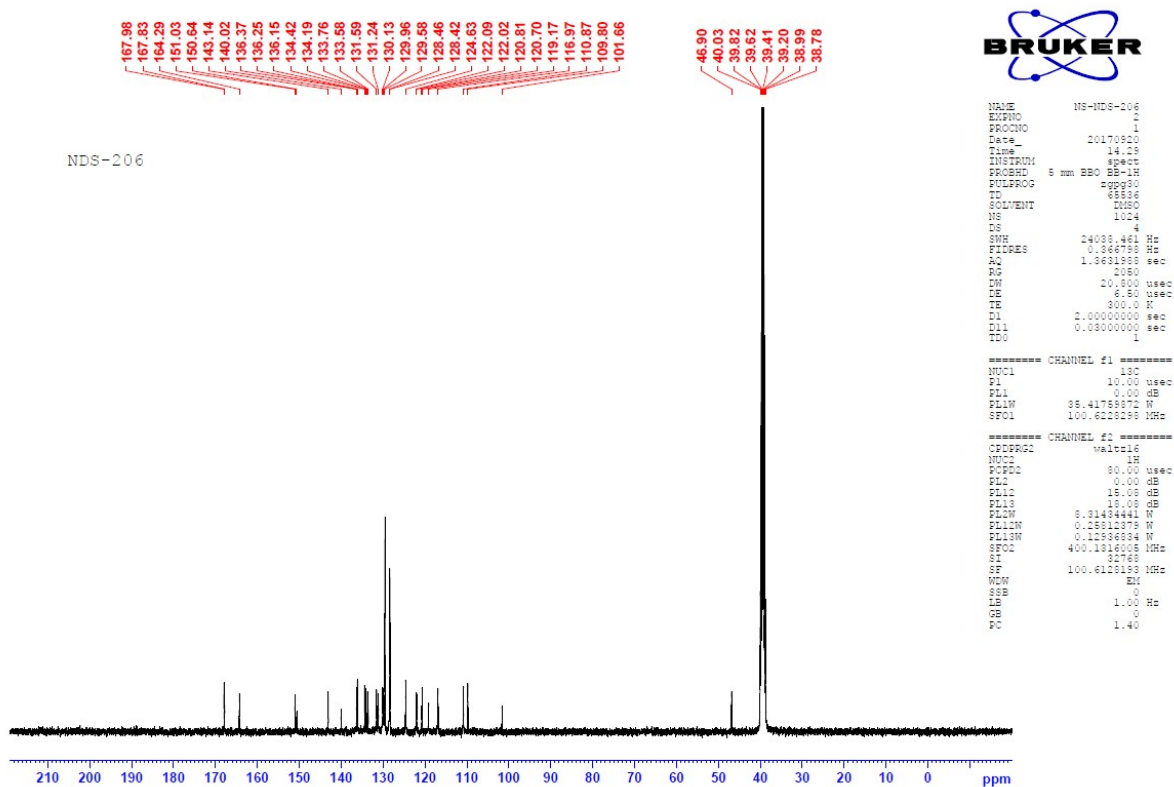

## HPLC (percentage purity) of 17d

Benzimidazole derivatives\_0915 nds-206\_018 9/16/2017 7:14:01 PM

Institute of Pharmacy, Nirma University

Report - HPLC analysis

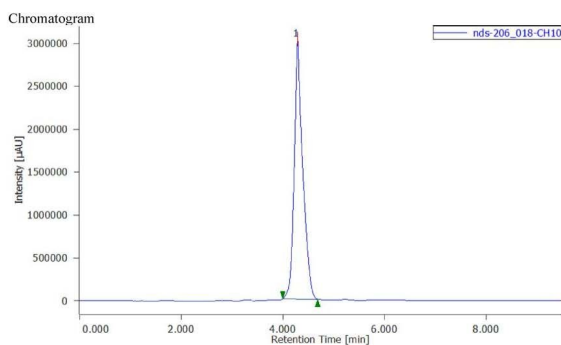

### Chromatogram Information

User Name Administrator  
 Date Modified 9/15/2017 7:15:13 PM  
 Description  
 HPLC System Name Jasco HPLC-4000  
 Injection Date 9/15/2017 4:00:13 PM  
 Volume 20.00 [µL]  
 Sample # 15  
 Project Name DST  
 Acquisition Time 9.5 [min]  
 Acquisition Sequence  
 Control Method 10min8020meohbuffer1mlpermin  
 Peak ID Table

### Peak Information

| Peak Name | RT [min] | Area [µVsec] | Height [µV] | Area%   | Height% | NTP  | Resolution | Symmetry Factor |
|-----------|----------|--------------|-------------|---------|---------|------|------------|-----------------|
| 1 Unknown | 4.293    | 35037850     | 3028794     | 100.000 | 100.000 | 3801 | N/A        | 1.289           |

## HPLC (peak purity) of 17d

Benzimidazole derivatives\_0915 nds-206\_018 9/22/2017 10:29:52 AM

Institute of Pharmacy, Nirma University

Report - HPLC peak purity

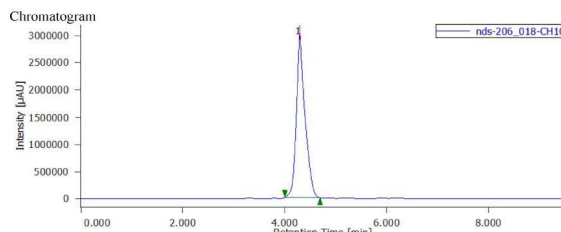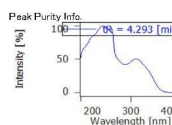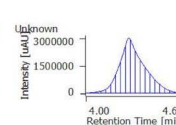

|                   |          |
|-------------------|----------|
| Peak #            | 1        |
| Peak Name         | Unknown  |
| RT [min]          | 4.2933   |
| High Purity [%]   | 100.00   |
| Medium Purity [%] | 0.00     |
| Low Purity [%]    | 0.00     |
| NTP               | 3801     |
| Area [µVsec]      | 35037850 |
| Height [µV]       | 3028794  |
| Symmetry Factor   | 1.289    |

## FTIR spectra of 17e

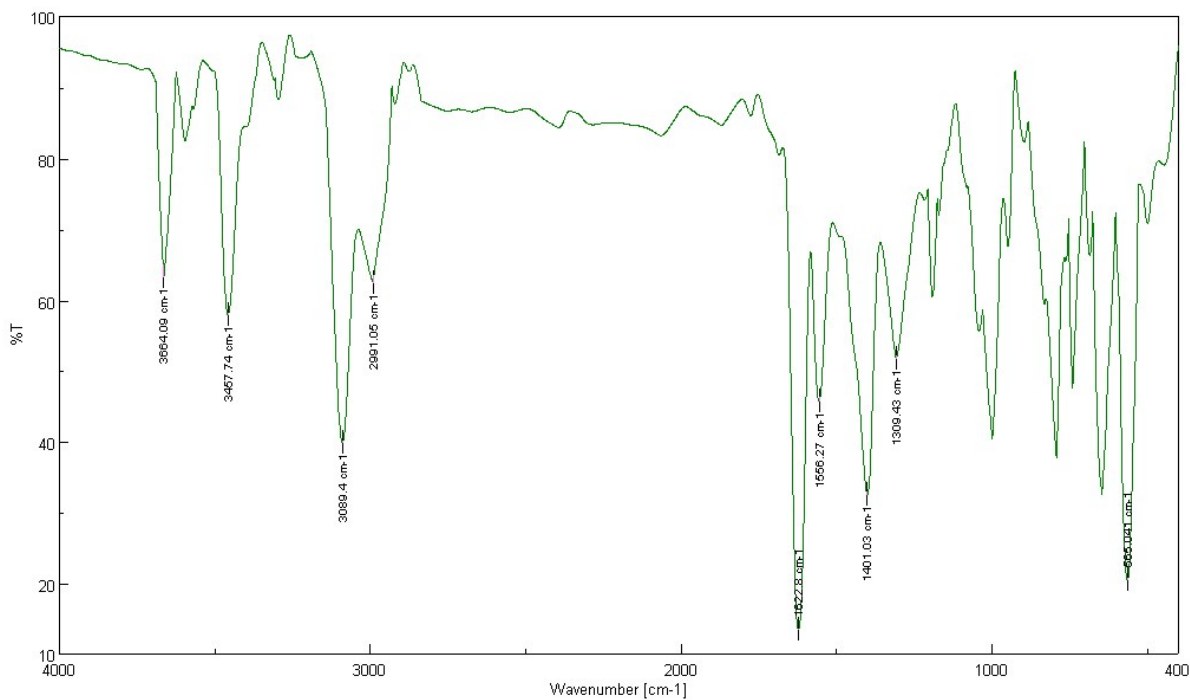

### MASS Analysis of synthesized compound: 17e M+1: 387

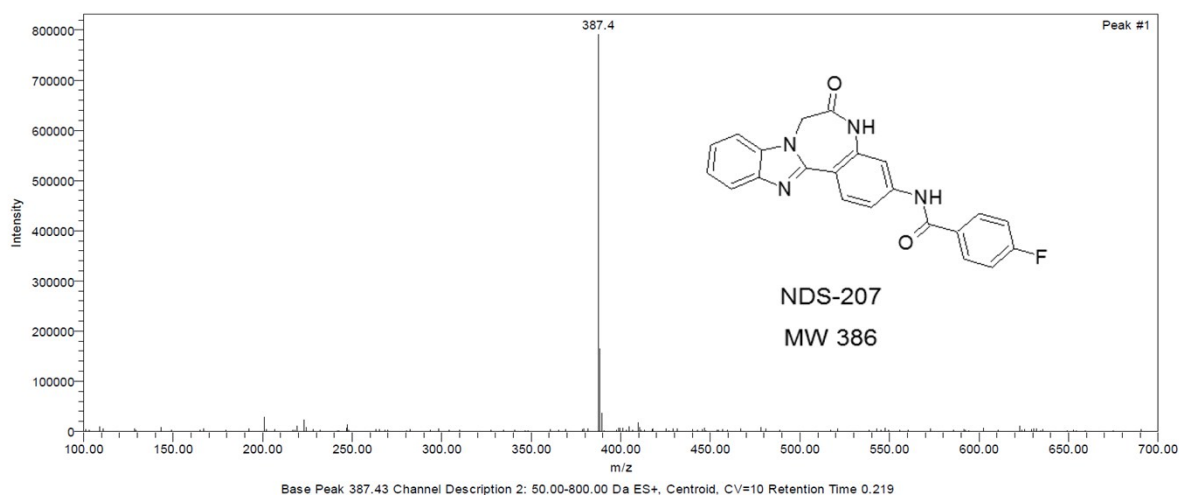

### <sup>1</sup>H-NMR Analysis of synthesized compound: 17e

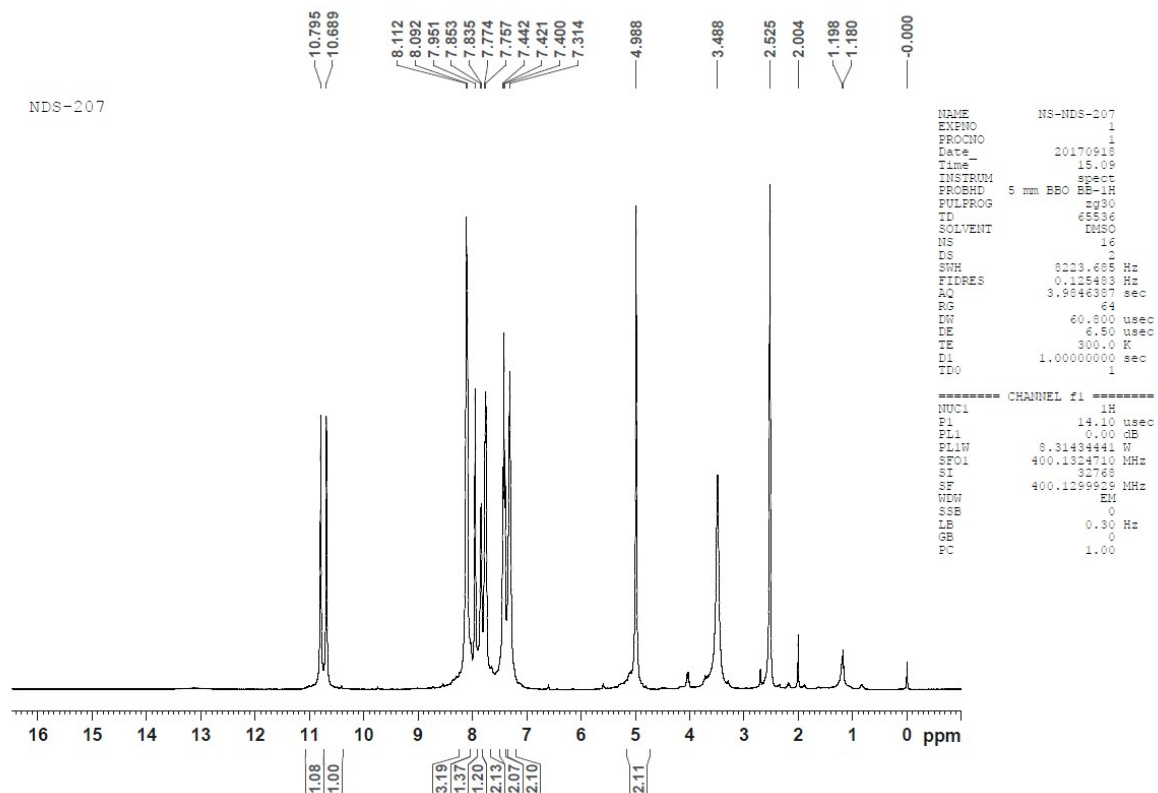

# 1H-NMR-D2O exchange analysis of synthesized compound: 17e

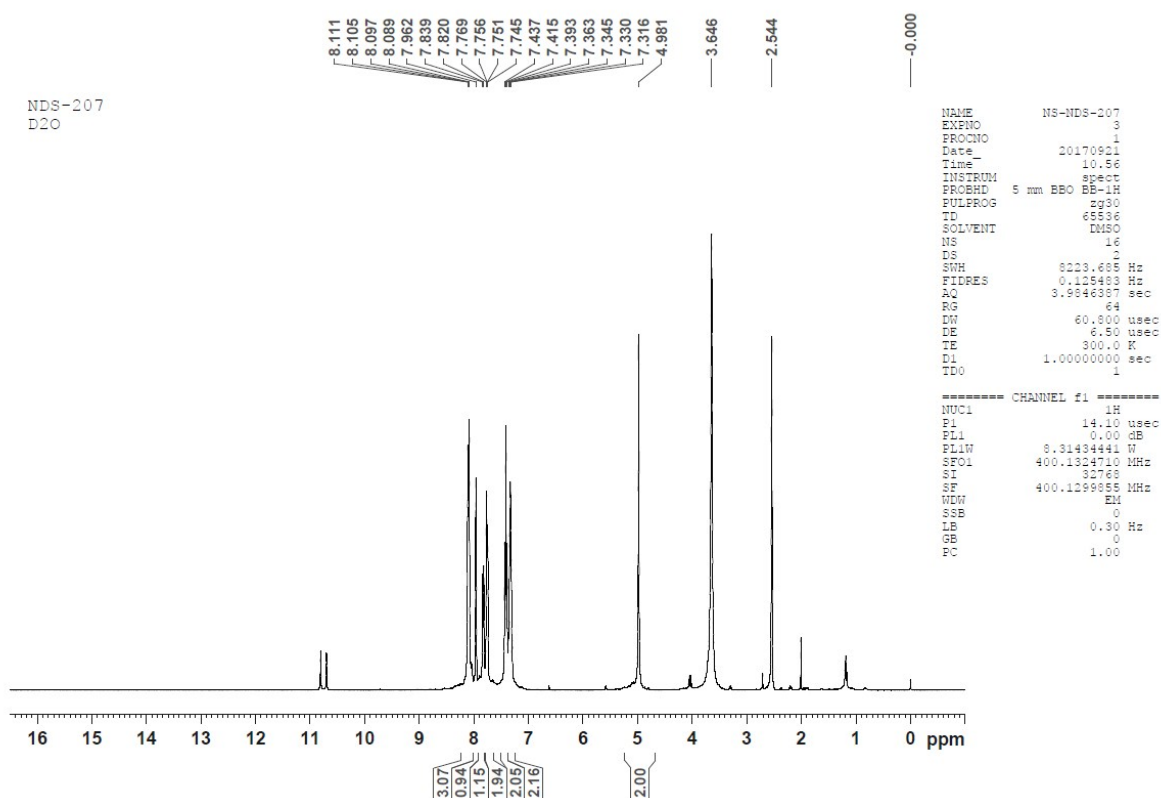

# 13C-NMR Analysis of synthesized compound: 17e

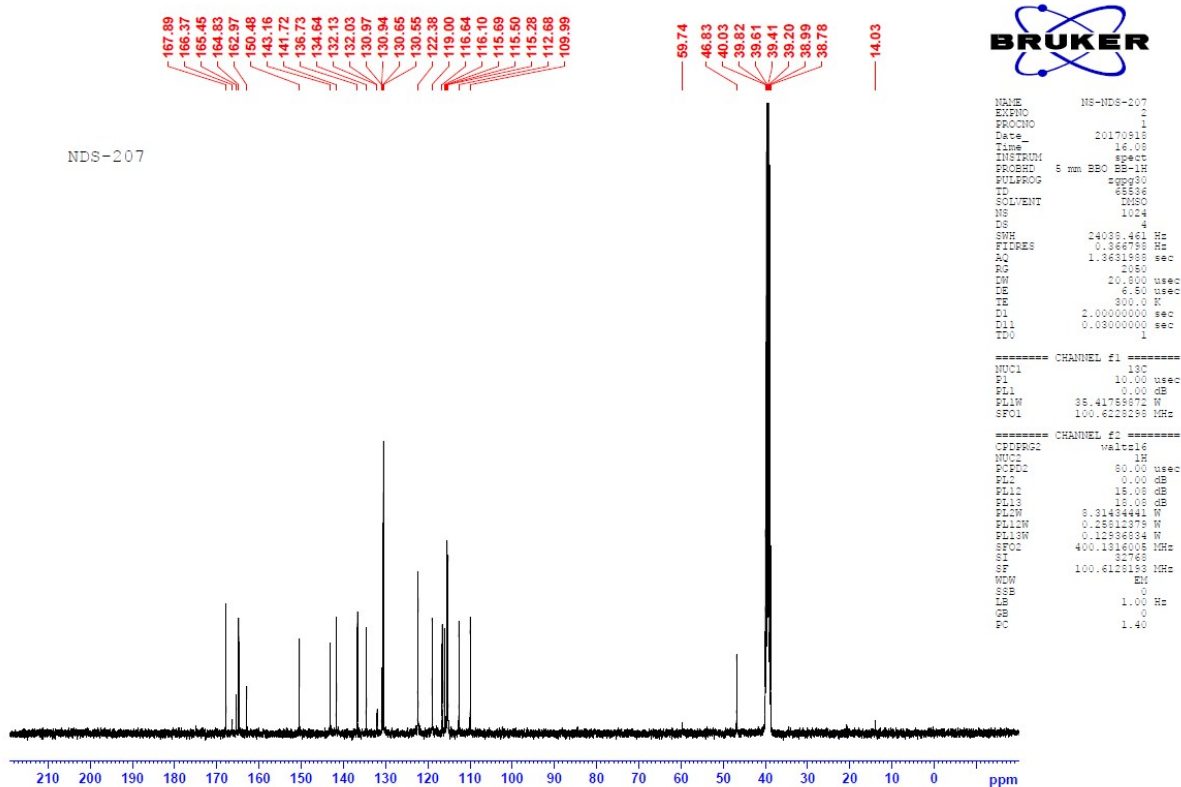

## HPLC (percentage purity) of 17e

Benzimidazole derivatives\_0915 nds-207\_012 9/16/2017 7:17:39 PM

Institute of Pharmacy, Nirma University

Report - HPLC analysis

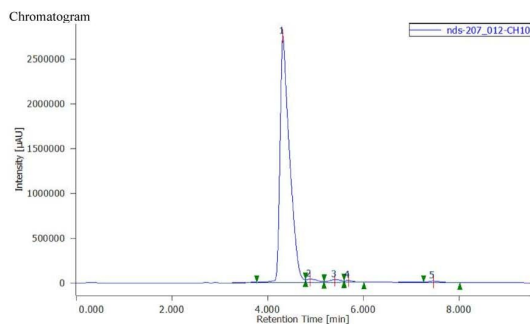

### Chromatogram Information

User Name Administrator  
 Date Modified 9/15/2017 7:15:03 PM  
 Description  
 HPLC System Name Jasco HPLC-4000  
 Injection Date 9/15/2017 2:01:09 PM  
 Volume 20.00  $\mu$ L  
 Sample # 9  
 Project Name DST  
 Acquisition Time 9.5 [min]  
 Acquisition Sequence  
 Control Method 10min8020mechbuffer1mlpermin  
 Peak ID Table

### Peak Information

| Peak Name | CH | IR [min] | Area [V*sec] | Height [V] | Area% Height  | NTP  | Resolution | Symmetry Factor |
|-----------|----|----------|--------------|------------|---------------|------|------------|-----------------|
| 1 Unknown | 10 | 4.323    | 37823777     | 2751846    | 96.701/96.349 | 2650 | N/A        | 1.821           |
| 2 Unknown | 10 | 4.887    | 820189       | 38802      | 1.805/1.295   | N/A  | N/A        | N/A             |
| 3 Unknown | 10 | 5.410    | 858688       | 22957      | 1.402/1.035   | N/A  | N/A        | N/A             |
| 4 Unknown | 10 | 5.687    | 247102       | 21696      | 0.824/0.760   | N/A  | N/A        | N/A             |
| 5 Unknown | 10 | 7.460    | 280582       | 11076      | 0.708/0.598   | 5601 | N/A        | N/A             |

## HPLC (peak purity) of 17e

Benzimidazole derivatives\_0915 nds-207\_012 9/22/2017 10:23:33 AM

Institute of Pharmacy, Nirma University

Report - HPLC peak purity

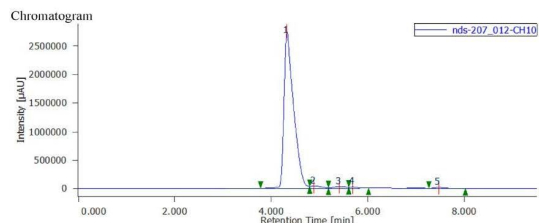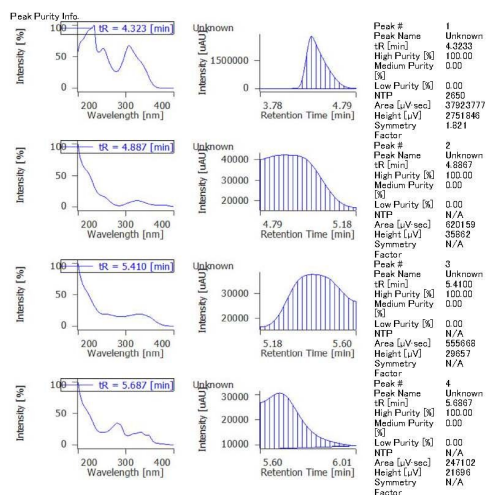

## FTIR spectra of 17f

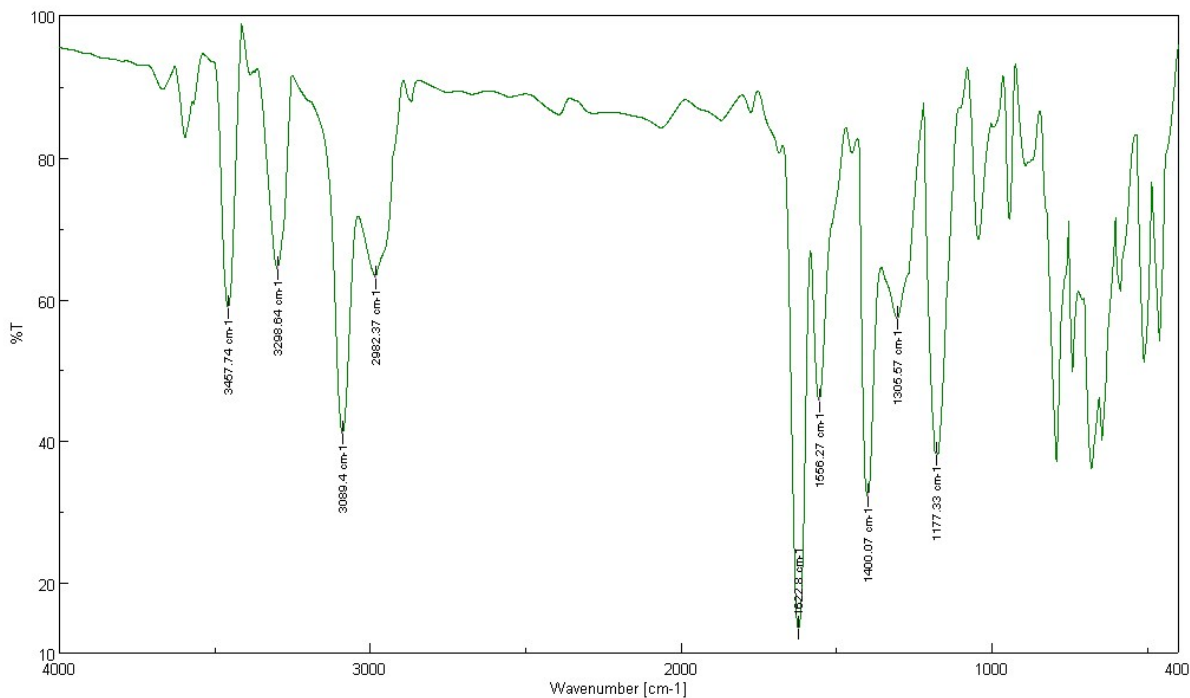

## MASS Analysis of synthesized compound: 17f M+1: 399

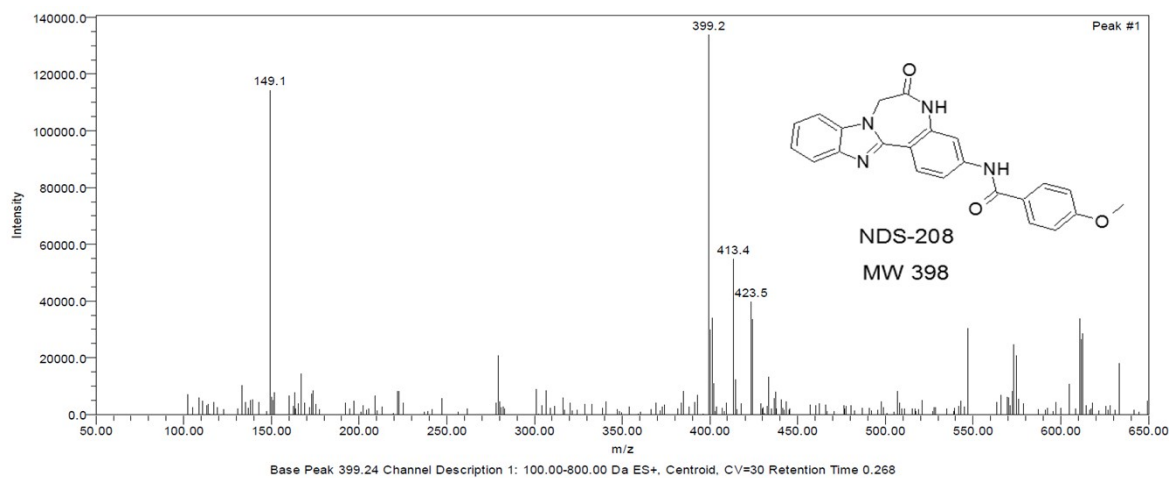

## <sup>1</sup>H-NMR Analysis of synthesized compound: 17f

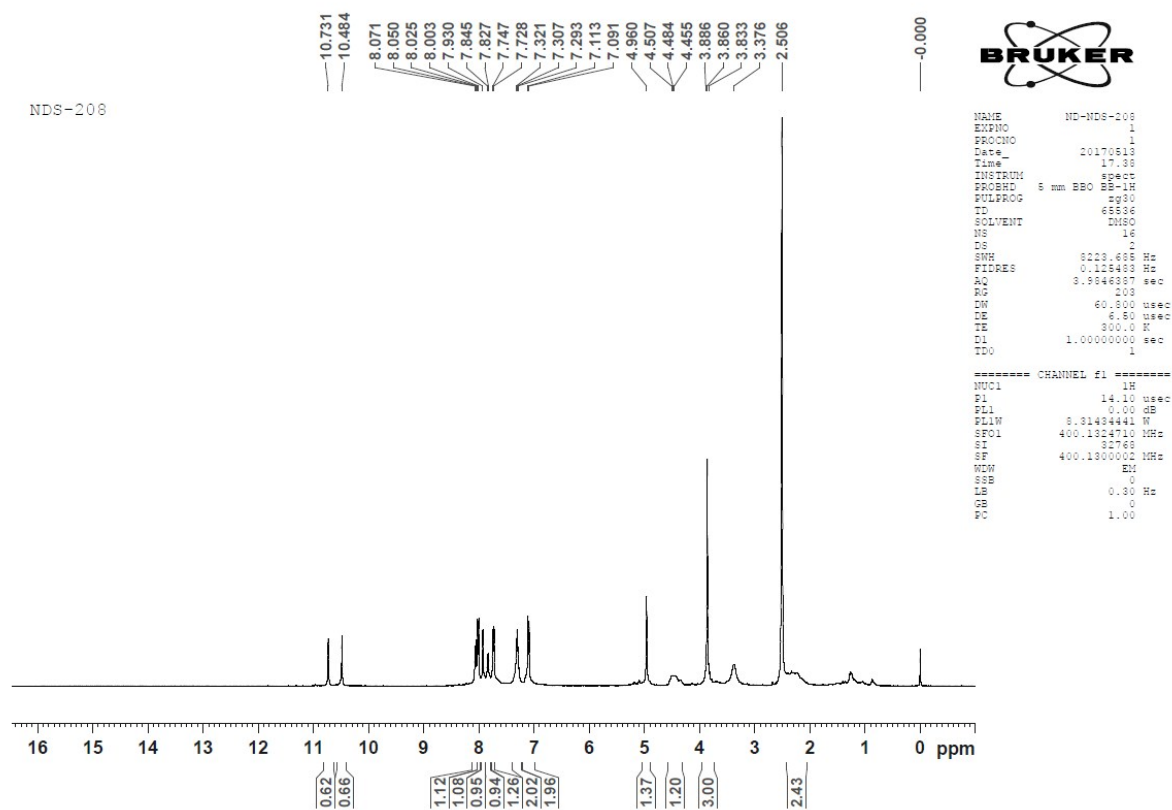



# 1H-NMR-D2O exchange analysis of synthesized compound: 17f

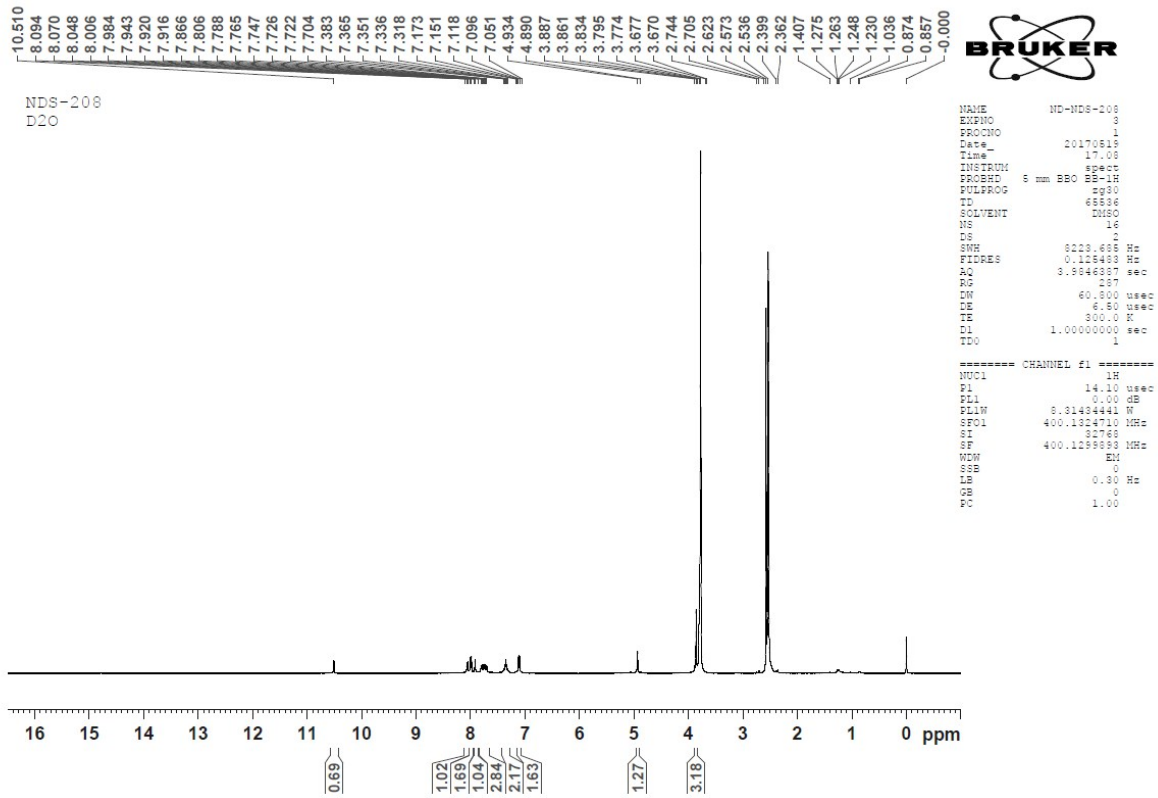

# 13C-NMR Analysis of synthesized compound: 17f

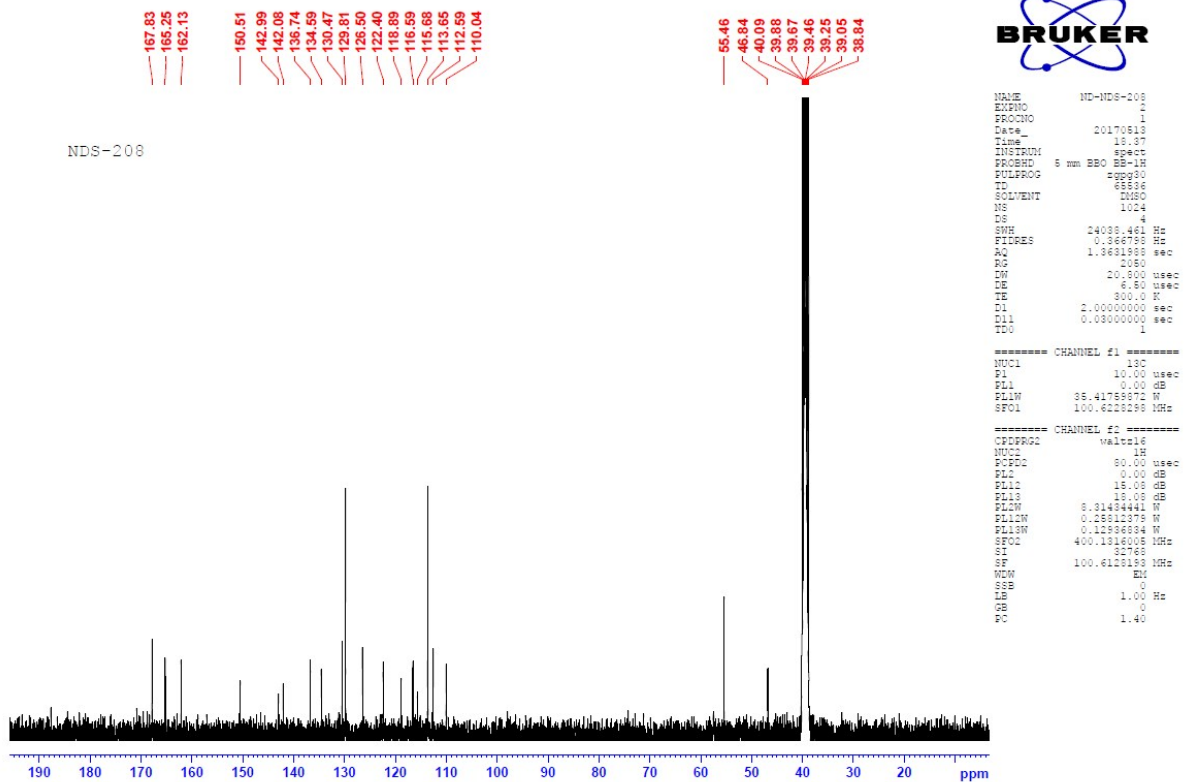

## HPLC (percentage purity) of 17f

Benzimidazole derivative\_0915 nds-208.013 9/16/2017 7:17:53 PM

Institute of Pharmacy, Nirma University

Report - HPLC analysis

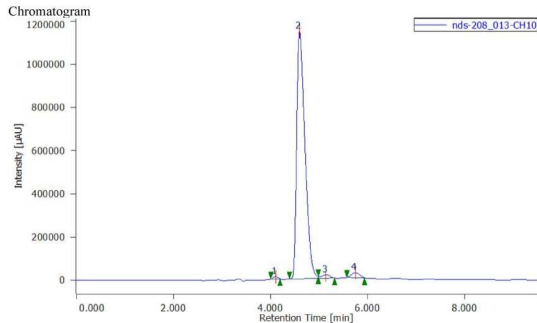

### Chromatogram Information

User Name Administrator  
 Date Modified 9/15/2017 7:15:05 PM  
 Description  
 HPLC System Name Jasco HPLC-4000  
 Injection Date 9/15/2017 2:12:36 PM  
 Volume 20.00 [µL]  
 Sample # 10  
 Project Name DST  
 Acquisition Time 9.5 [min]  
 Acquisition Sequence  
 Control Method 10min8020meohbuffer1mlpermin  
 Peak ID Table

### Peak Information

| # | Peak Name | CH | IR [min] | Area [µVsec] | Height [µV] | Area%  | Height% | NTP  | Resolution | Symmetry Factor |
|---|-----------|----|----------|--------------|-------------|--------|---------|------|------------|-----------------|
| 1 | U-unknown | 10 | 4.107    | 68682        | 10994       | 0.475  | 0.885   | 8250 | 2.015      | 0.995           |
| 2 | U-unknown | 10 | 4.600    | 13512537     | 1147572     | 88.290 | 95.855  | 3571 | N/A        | 1.648           |
| 3 | U-unknown | 10 | 5.147    | 183116       | 18033       | 1.375  | 1.339   | 3983 | N/A        | N/A             |
| 4 | U-unknown | 10 | 5.750    | 282333       | 22990       | 1.889  | 1.920   | 5057 | N/A        | 1.043           |

## HPLC (peak purity) of 17f

Benzimidazole derivative\_0915 nds-208.013 9/22/2017 10:28:53 AM

Institute of Pharmacy, Nirma University

Report - HPLC peak purity

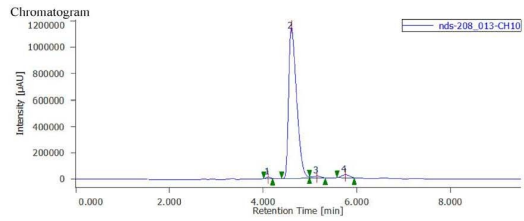

### Peak Purity Info

| Peak # | Peak Name | IR [min] | High Purity [%] | Medium Purity [%] | Low Purity [%] | Area [µVsec] | Height [µV] | Symmetry Factor |
|--------|-----------|----------|-----------------|-------------------|----------------|--------------|-------------|-----------------|
| 1      | Unknown   | 4.107    | 100.00          | 0.00              | 0.00           | 68682        | 10594       | 0.995           |
| 2      | Unknown   | 4.600    | 100.00          | 0.00              | 0.00           | 13512537     | 1147572     | 1.648           |
| 3      | Unknown   | 5.147    | 100.00          | 0.00              | 0.00           | 183116       | 18033       | N/A             |
| 4      | Unknown   | 5.750    | 100.00          | 0.00              | 0.00           | 282333       | 22990       | 1.043           |

## FTIR spectra of 17g

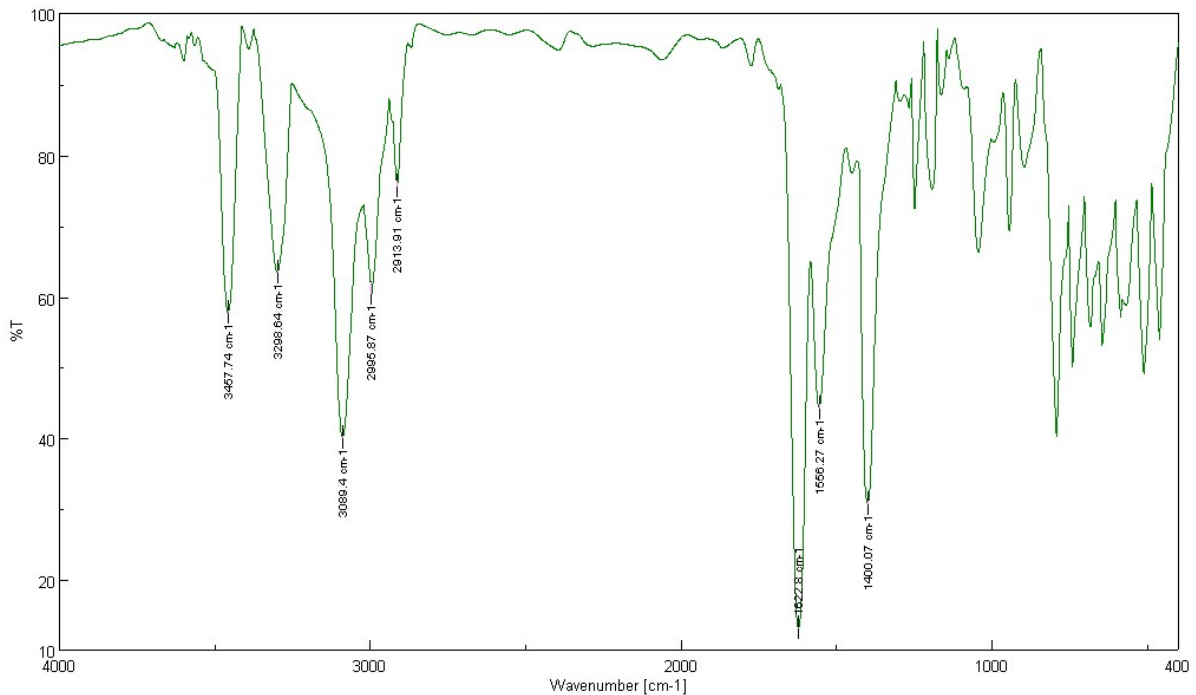

## MASS Analysis of synthesized compound: 17g M+1: 383

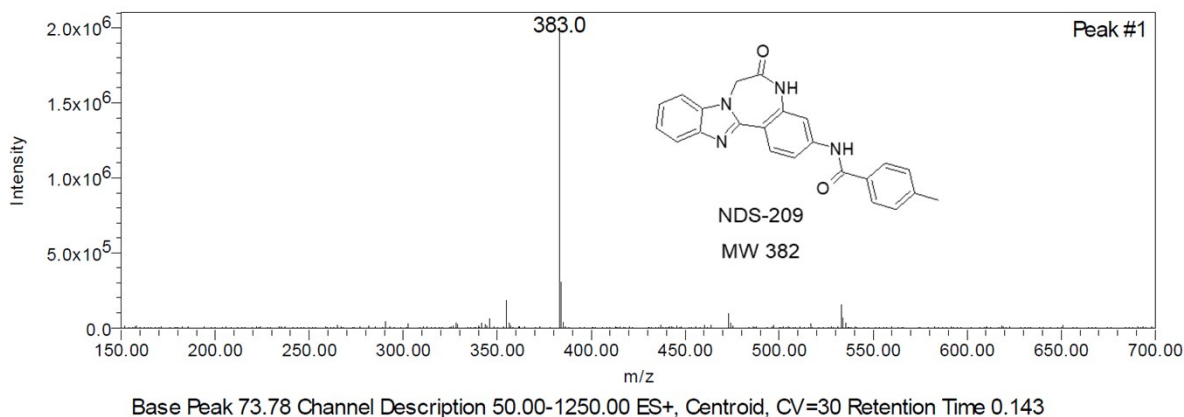

## <sup>1</sup>H-NMR Analysis of synthesized compound: 17g

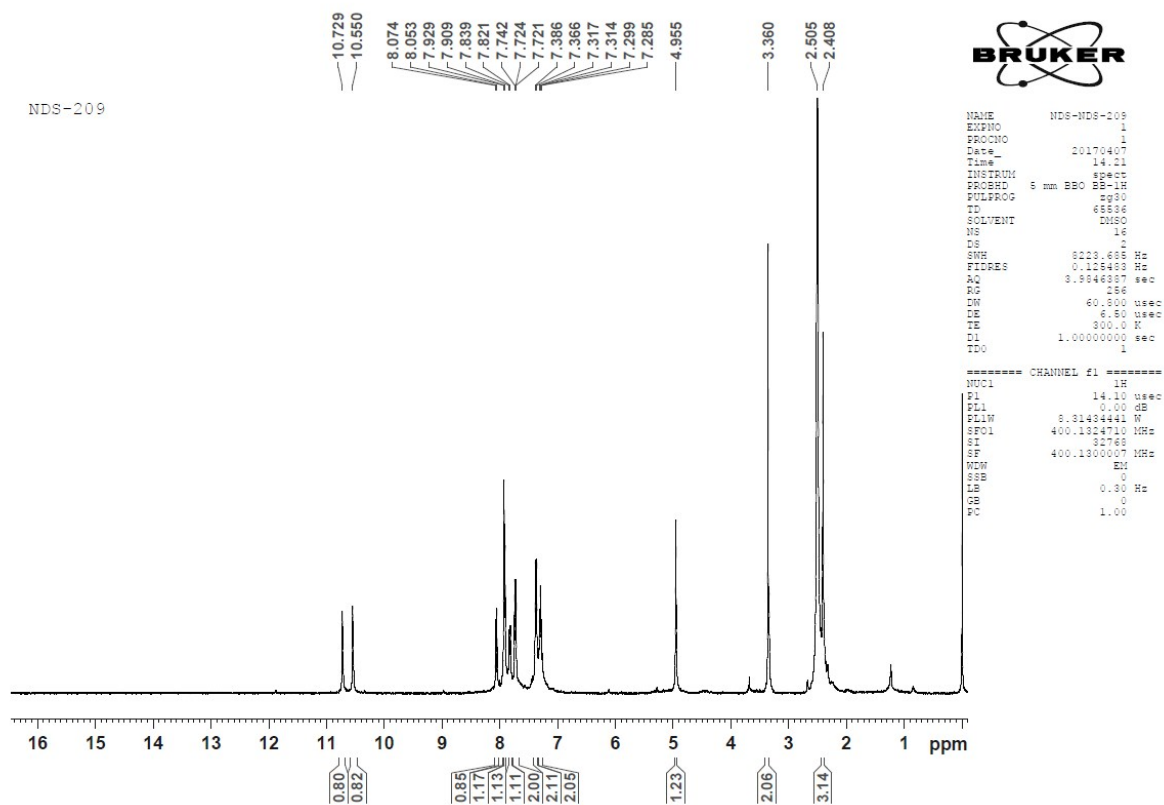

# 1H-NMR-D2O exchange analysis of synthesized compound: 17g

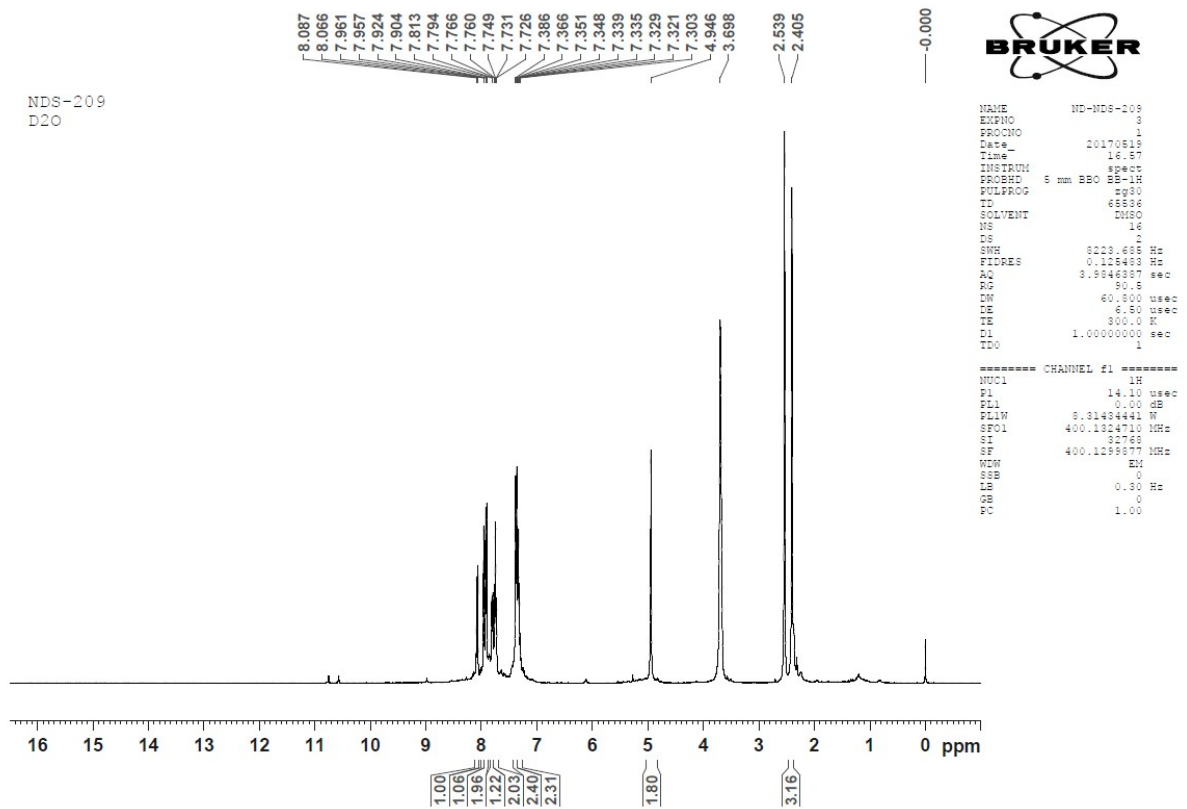

# 13C-NMR Analysis of synthesized compound: 17g

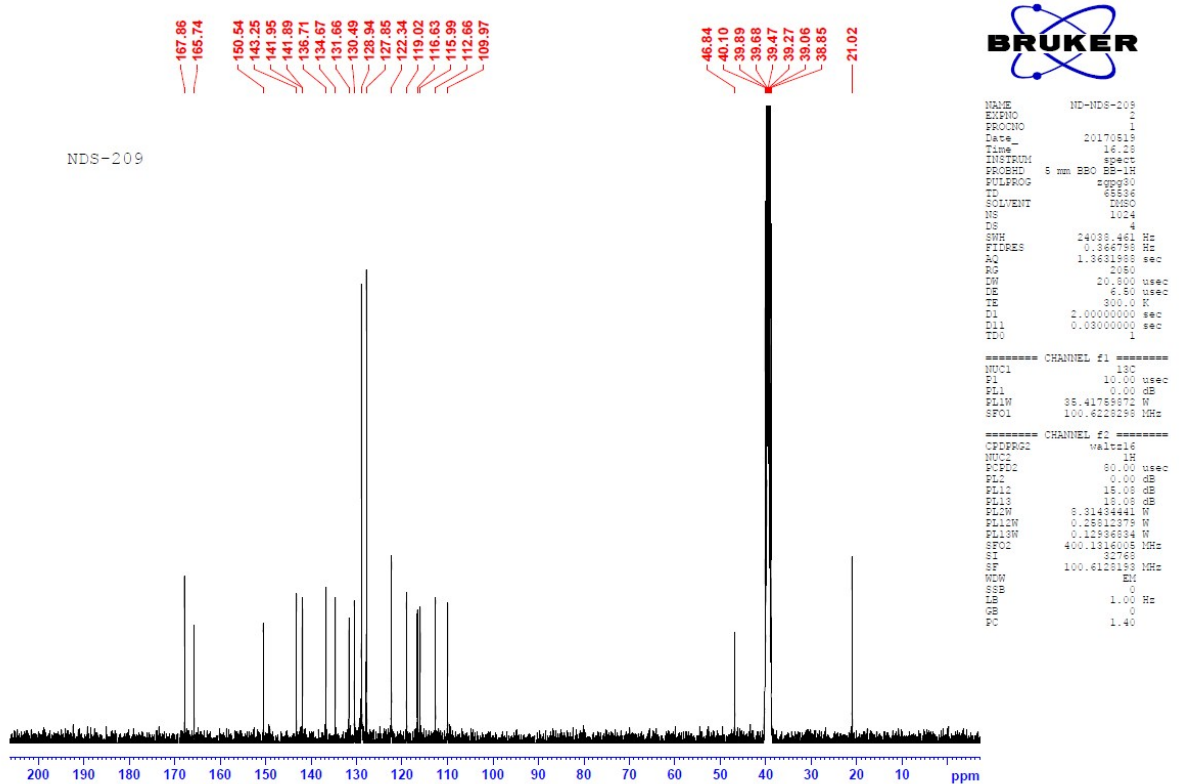

## HPLC (percentage purity) of 17g

Benzimidazole derivatives,0815 nds-209\_014 9/16/2017 7:13:19 PM

Institute of Pharmacy, Nirma University

Report - HPLC analysis

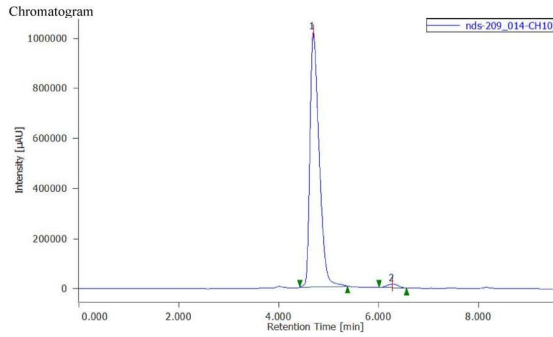

### Chromatogram Information

User Name Administrator  
 Date Modified 9/15/2017 7:15:08 PM  
 Description  
 HPLC System Name Jasco HPLC-4000  
 Injection Date 9/15/2017 2:24:55 PM  
 Volume 20.00 [µL]  
 Sample # 11  
 Project Name DST  
 Acquisition Time 9.5 [min]  
 Acquisition Sequence  
 Control Method 10min8020meohbuffer1mlpermin  
 Peak ID Table

### Peak Information

| Peak Name | CH | RT [min] | Area [µVsec] | Height [µV] | Area%  | Height% | NTP  | Resolution | Symmetry Factor |
|-----------|----|----------|--------------|-------------|--------|---------|------|------------|-----------------|
| 1 Unknown | 10 | 4.697    | 13050351     | 1016424     | 93.330 | 93.679  | 3293 | 4.244      | 1.535           |
| 2 Unknown | 10 | 6.283    | 221682       | 14682       | 1.676  | 1.421   | 3512 | N/A        | 0.978           |

## HPLC (peak purity) of 17g

Benzimidazole derivatives,0815 nds-209\_014 9/22/2017 10:29:15 AM

Institute of Pharmacy, Nirma University

Report - HPLC peak purity

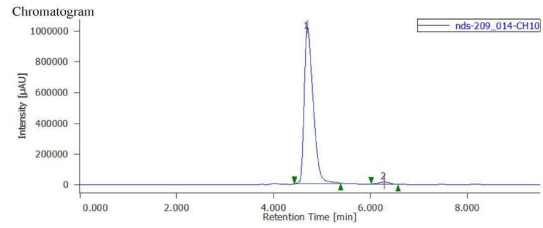

### Peak Purity Info

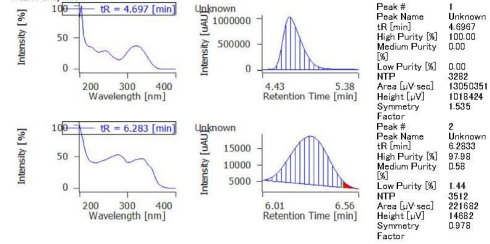

| Peak # | Peak Name | RT [min] | High Purity [%] | Medium Purity [%] | Low Purity [%] | NTP  | Area [µVsec] | Height [µV] | Symmetry Factor |
|--------|-----------|----------|-----------------|-------------------|----------------|------|--------------|-------------|-----------------|
| 1      | Unknown   | 4.697    | 100.00          | 0.00              | 0.00           | 3282 | 13050351     | 1016424     | 1.535           |
| 2      | Unknown   | 6.283    | 97.98           | 0.58              | 1.44           | 3512 | 221682       | 14682       | 0.978           |

## FTIR spectra of 17h

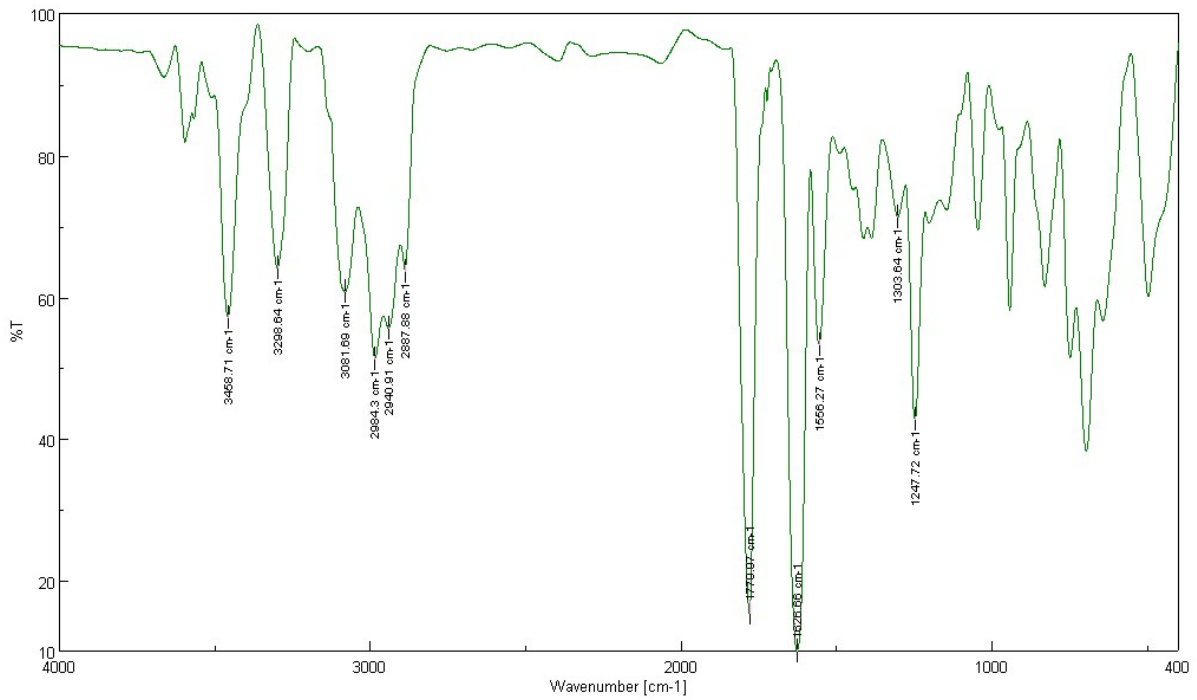

## MASS Analysis of synthesized compound: 17h M+1: 365

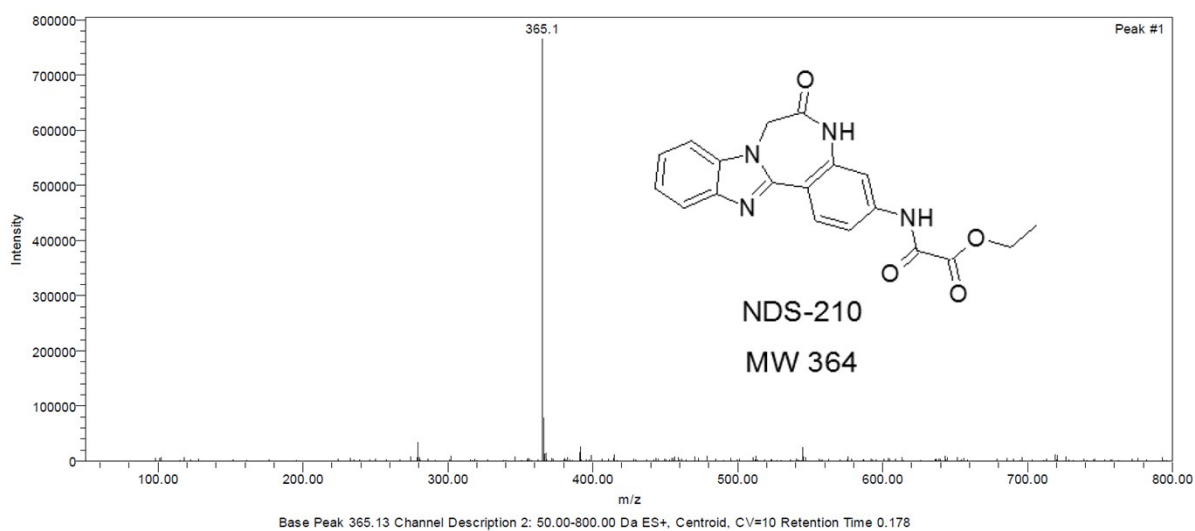

## <sup>1</sup>H-NMR Analysis of synthesized compound: 17h

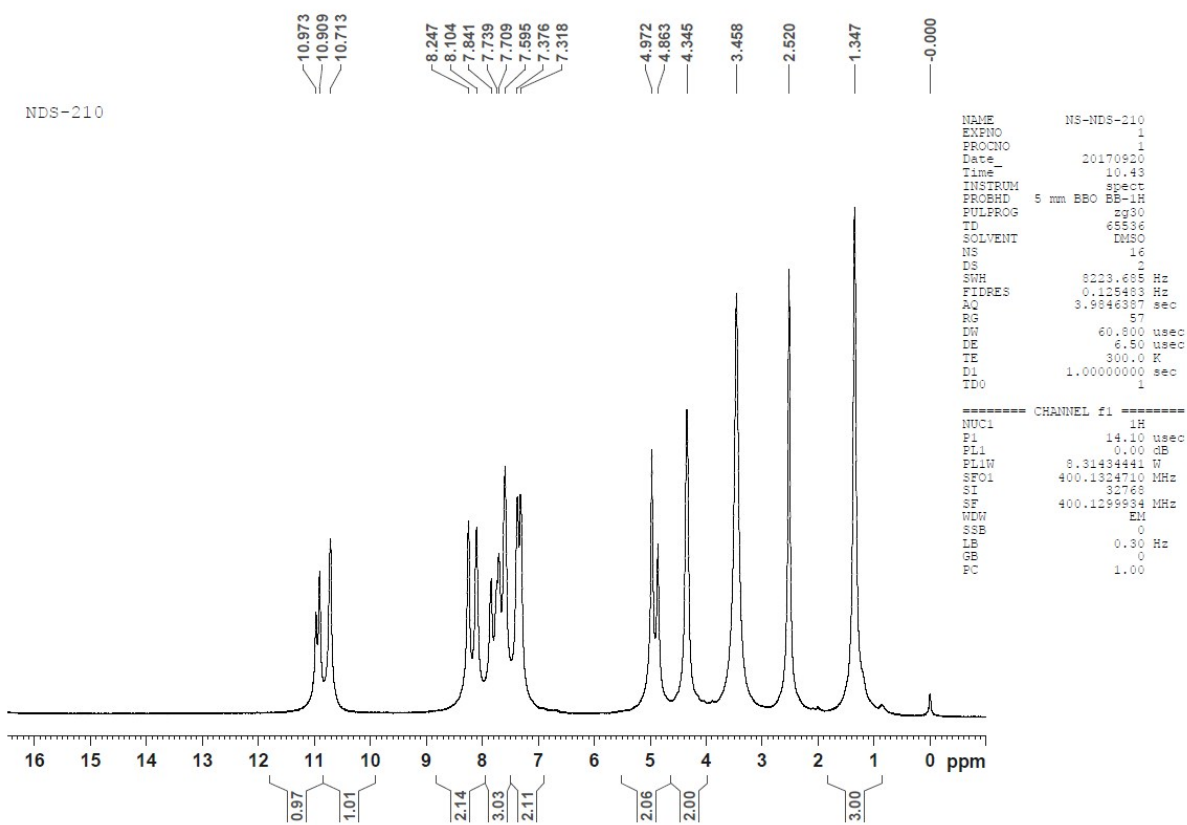

# 1H-NMR-D2O exchange analysis of synthesized compound: 17h

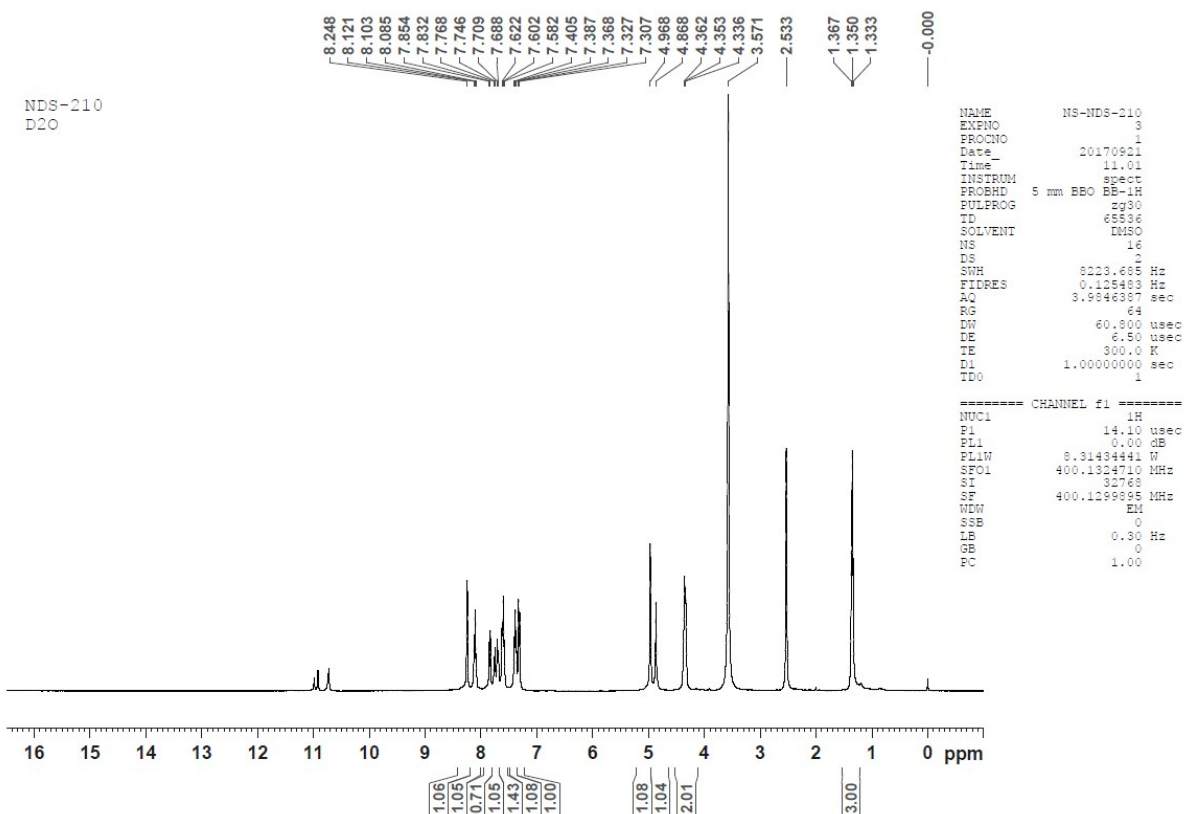

# 13C-NMR Analysis of synthesized compound: 17h

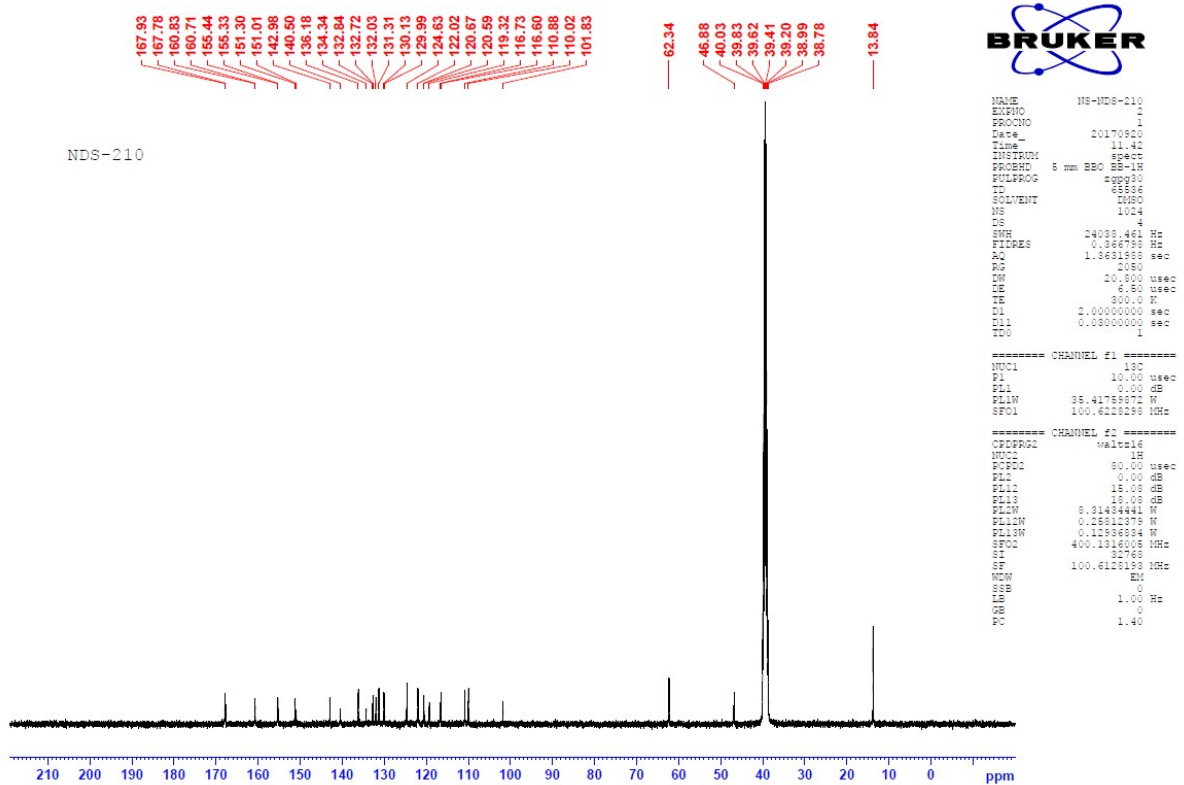

## HPLC (percentage purity) of 17h

Benzimidazole derivatives\_0915 nds-210\_020 9/16/2017 7:14:53 PM

Institute of Pharmacy, Nirma University

Report - HPLC analysis

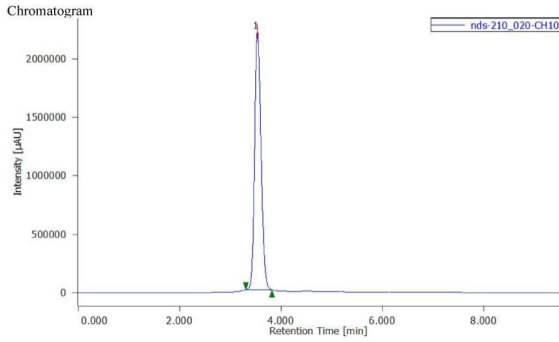

### Chromatogram Information

User Name Administrator  
 Date Modified 9/15/2017 7:15:18 PM  
 Description  
 HPLC System Name Jasco HPLC-4000  
 Injection Date 9/15/2017 4:32:26 PM  
 Volume 20.00 [µL]  
 Sample # 17  
 Project Name DST  
 Acquisition Time 9.5 [min]  
 Acquisition Sequence  
 Control Method 10min8020meohbuffer1mlpermin  
 Peak ID Table

### Peak Information

| Peak Name | RT [min] | Area [µVsec] | Height [µV] | Area%   | Height% | NTP  | Resolution | Symmetry Factor |
|-----------|----------|--------------|-------------|---------|---------|------|------------|-----------------|
| 1 Unknown | 3.540    | 19420156     | 2205507     | 100.000 | 100.000 | 3786 | N/A        | 1.182           |

## HPLC (peak purity) of 17h

Benzimidazole derivatives\_0915 nds-210\_020 9/22/2017 10:30:29 AM

Institute of Pharmacy, Nirma University

Report - HPLC peak purity

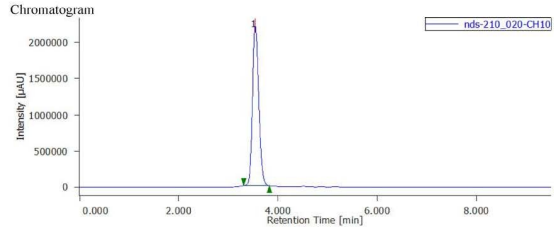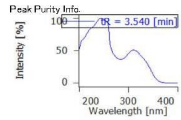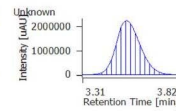

Peak # 1  
 Peak Name Unknown  
 RT [min] 3.5400  
 High Purity [%] 100.00  
 Medium Purity [%] 0.00  
 Low Purity [%] 0.00  
 NTP 3786  
 Area [µVsec] 19420156  
 Height [µV] 2205507  
 Symmetry Factor 1.182

## FTIR spectra of 17i

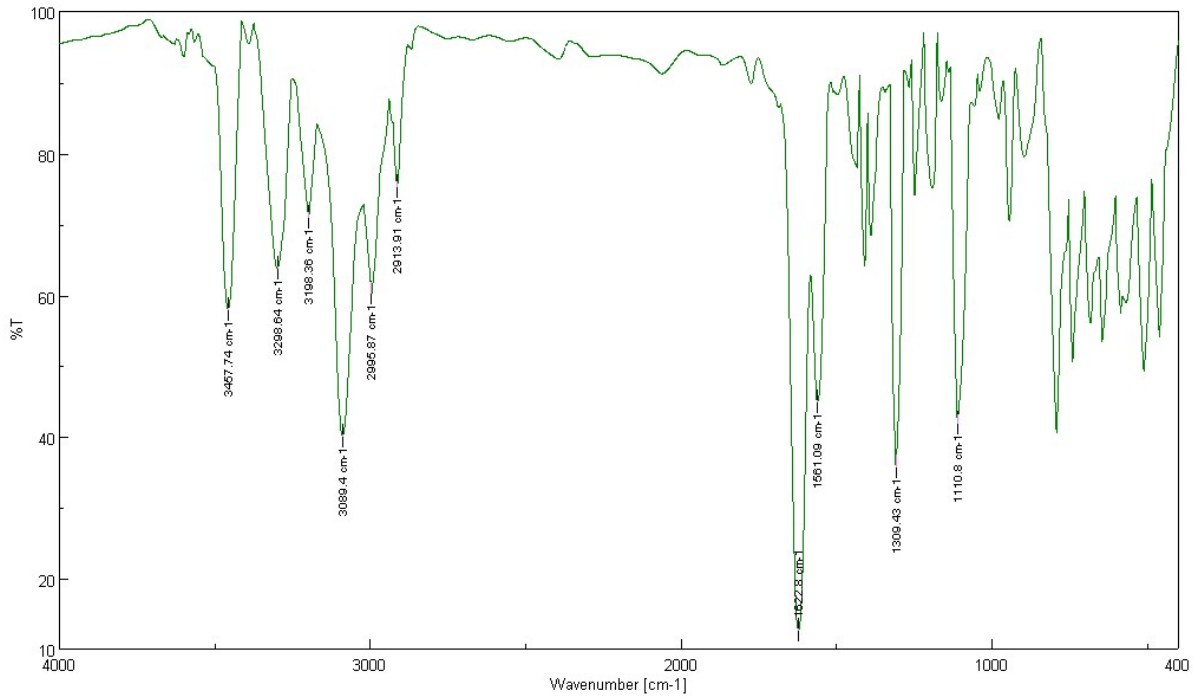



## MASS Analysis of synthesized compound: 17i M+1: 435

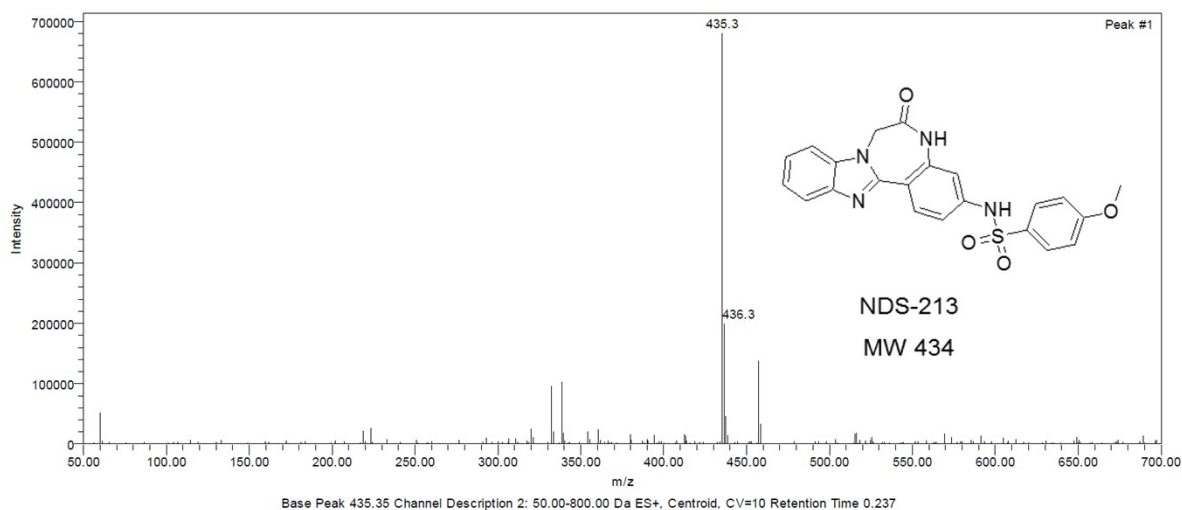

## <sup>1</sup>H-NMR Analysis of synthesized compound: 17i

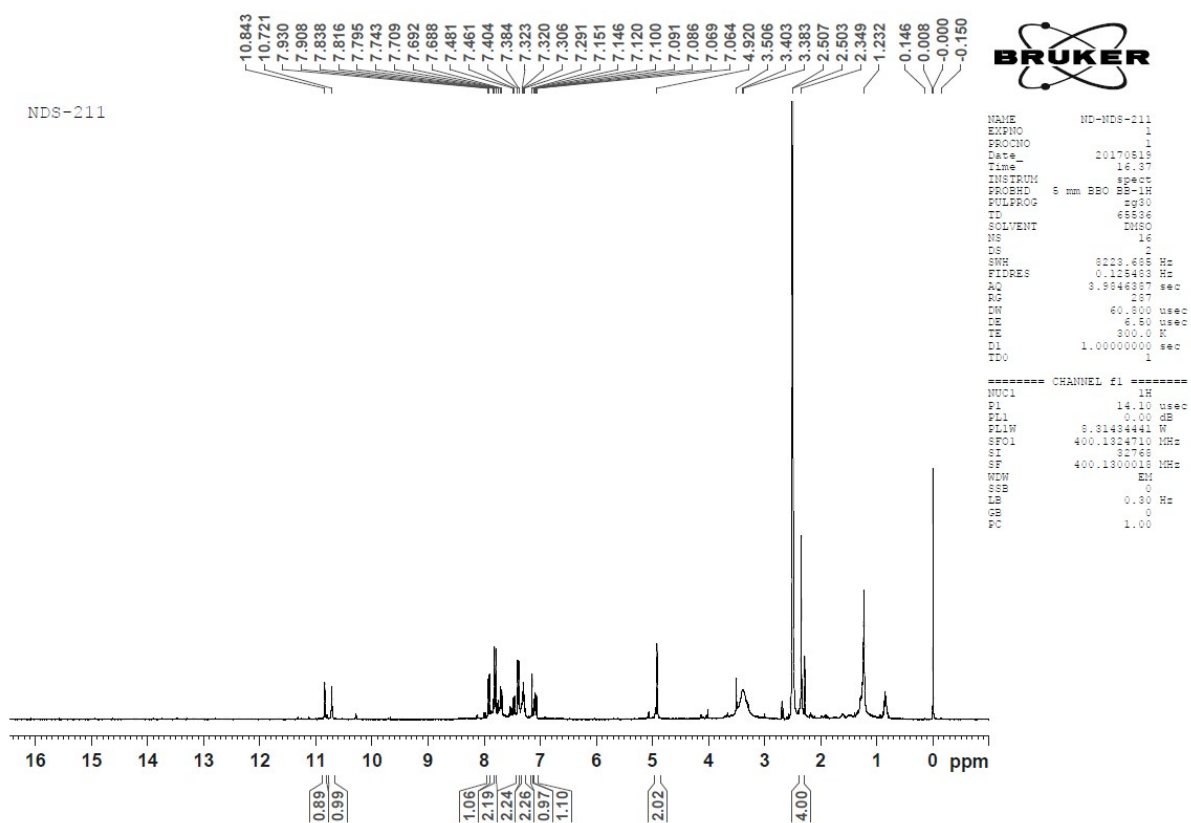

# 1H-NMR-D2O exchange analysis of synthesized compound: 17i

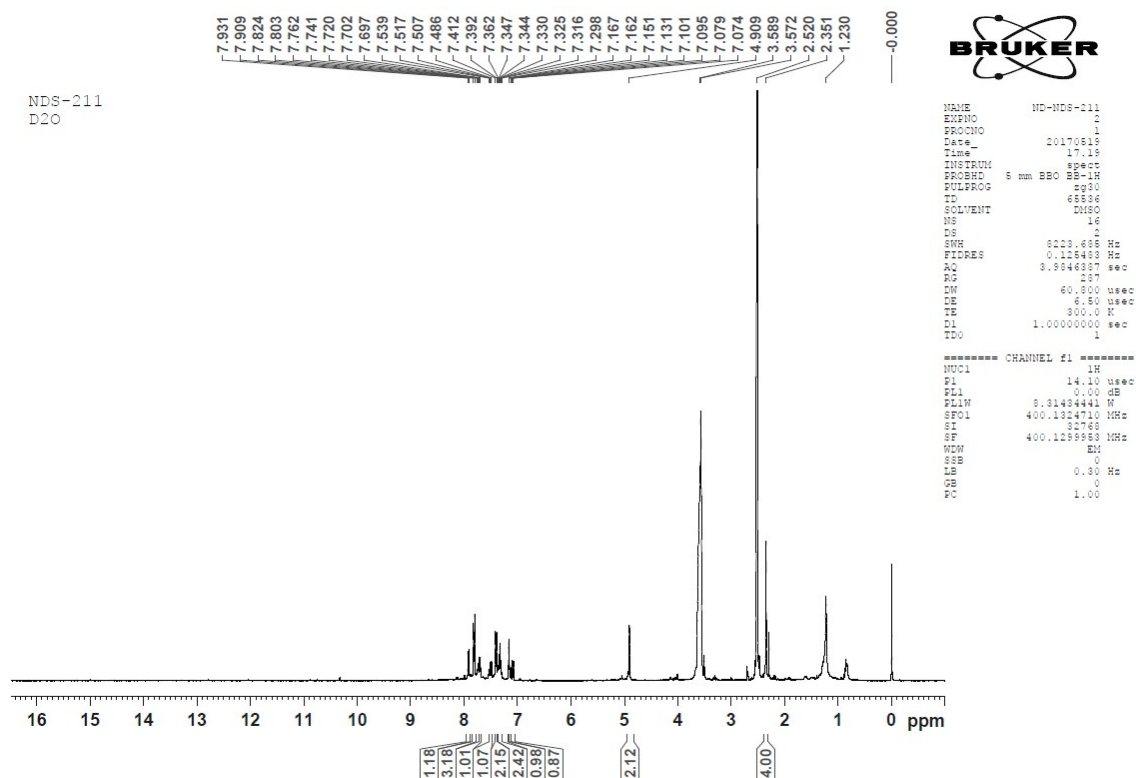

## HPLC (percentage purity) of 17i

Benzimidazole derivatives\_0815 nds-211\_022 9/16/2017 7:15:16 PM

Institute of Pharmacy, Nirma University

Report - HPLC analysis

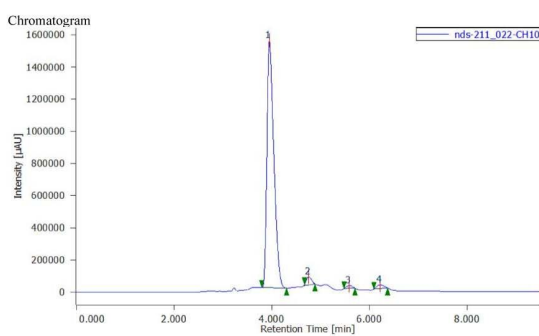

### Chromatogram Information

User Name Administrator  
Date Modified 9/15/2017 7:15:20 PM  
Description  
HPLC System Name Jasco HPLC-4000  
Injection Date 9/15/2017 4:53:22 PM  
Volume 20.00 [µL]  
Sample # 19  
Project Name DST  
Acquisition Time 9.5 [min]  
Acquisition Sequence  
Control Method 10min8020mechbuffer1mlpermin  
Peak ID Table

### Peak Information

| Peak Name | ChRt [min] | Area [uVsec] | Height [uV] | Area%  | Height% | NTP   | Resolution | Symmetry Factor |
|-----------|------------|--------------|-------------|--------|---------|-------|------------|-----------------|
| 1         | Unknown    | 15110610     | 1538162     | 95.308 | 94.496  | 3364  | 3.422      | 1.514           |
| 2         | Unknown    | 369143       | 49509       | 2.328  | 3.042   | 7891  | 3.859      | N/A             |
| 3         | Unknown    | 5590         | 146076      | 17778  | 0.921   | 1.092 | 8263       | 2.351           |
| 4         | Unknown    | 6.223        | 228722      | 22811  | 1.443   | 1.371 | 9571       | N/A             |

## HPLC (peak purity) of 17i

Benzimidazole derivatives\_0815 nds-211\_022 9/22/2017 10:43:17 AM

Institute of Pharmacy, Nirma University

Report - HPLC peak purity

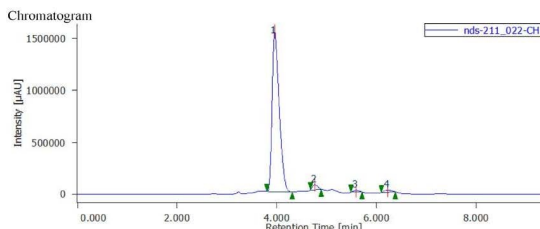

### Peak Purity Info

| Peak # | Peak Name | ChRt [min] | High Purity [%] | Medium Purity [%] | Low Purity [%] | NTP  | Area [uVsec] | Height [uV] | Symmetry Factor |
|--------|-----------|------------|-----------------|-------------------|----------------|------|--------------|-------------|-----------------|
| 1      | Unknown   | 3.957      | 100.00          | 0.00              | 0.00           | 3894 | 15110610     | 1538162     | 1.5114          |
| 2      | Unknown   | 4.763      | 100.00          | 0.00              | 0.00           | 7891 | 369143       | 49509       | N/A             |
| 4      | Unknown   | 5.590      | 100.00          | 0.00              | 0.00           | 8263 | 5590         | 146076      | 17778           |
| 5      | Unknown   | 6.223      | 100.00          | 0.00              | 0.00           | 9571 | 228722       | 22811       | 1.076           |
